# Supplementary material for: In Vitro Antioxidant and In Vivo Antigenotoxic Features of a Series of 61 Essential Oils and Quantitative Composition–Activity Relationships Modeled through Machine Learning Algorithms
Source: Antioxidants (Basel). 2023 Sep 29;12(10):1815. doi: 10.3390/antiox12101815 (PMC10604248; doi:10.3390/antiox12101815)
Supplement: Supplementary file 1 [file antioxidants-12-01815-s001.zip › antioxidants-2601580-supplementary.pdf]

# ***In vitro* Antioxidant and *in vivo* Antigenotoxic Features of a series of 61 Essential Oils and Quantitative-Composition Activity Relationships Modeling Through Machine Learning Algorithms**

Milan Mladenović<sup>1\*</sup>, Roberta Astolfi<sup>2</sup>, Nevena Tomašević<sup>1</sup>, Sanja Matić<sup>3</sup>, Mijat Božović<sup>4</sup>, Filippo Sapienza<sup>2</sup>, and Rino Ragno<sup>2\*</sup>

<sup>1</sup> Kragujevac Center for Computational Biochemistry, Department of Chemistry, Faculty of Science, University of Kragujevac, Radoja Domanovića 12, 34000 Kragujevac, P.O. Box 60, Serbia milan.mladenovic@pmf.kg.ac.rs (M.M.) nevena.tomasevic@pmf.kg.ac.rs (N.T.)

<sup>2</sup> Rome Center for Molecular Design, Department of Drug Chemistry and Technology, Faculty of Pharmacy and Medicine, Rome Sapienza University, P.le A. Moro 5, 00185, Rome, Italy filippo.sapienza@uniroma1.it (F.S.) roberta.astolfi@uniroma1.it (R.A.) rino.ragno@uniroma1.it (R.R.)

<sup>3</sup> Department of Science, Institute for Information Technologies Kragujevac, University of Kragujevac, Jovana Cvijića bb, 34000 Kragujevac, Serbia sanjamatic@kg.ac.rs (S.M.)

<sup>4</sup> University of Montenegro, Faculty of Science and Mathematics, Džordža Vašingtona bb, 81000 Podgorica, Montenegro mijatboz@ucg.ac.me (M.B)

\* Correspondence: milan.mladenovic@pmf.kg.ac.rs Tel.: +381 638932160, Fax: +381 34335040 (M.M.) rino.ragno@uniroma1.it Tel.: +39 49913937, Fax: +39 49913627 (R.R.)

## **Content**

**Table S1.** Investigated essential oils and their previously literature-reported chemical compositions and antioxidant features.

**Table S2.** Herein investigated essential oils chemical compositions.

**Table S3.** Total antioxidant capacity of examined EOs.

**Table S4.** DNA protective potential of selected 61 commercial essential oils on peroxy radical-induced DNA damage.

**Table S5.** DNA protective potential of selected 61 commercial essential oils on hydroxyl radical-induced DNA damage.

**Table S6.** List of dataset pretreatment parameters settings randomly varied during ML hyperparameters optimization.

**Table S7.** List of the initial thresholds<sup>a</sup> used for the ML models' for each antioxidant evaluation.

**Table S8.** List of hyperparameters setting used for the ML models' through random search optimization performed at 100 and 1000 iterations.

**Table S9.** List of hyperparameters setting used for the ML models' through random search optimization performed at 10000 and 100000 iterations.

## **Final ML Models Development**

### **1. M<sup>nt</sup>**

1.1. 100 random iterations.

**Table S10.** Coarse best models obtained for each classifier.

**Table S11.** Hyperparameters associated to models MN1-MN5. The list is reported as python dictionaries.

1.2. 1000 random iterations.

**Table S12.** Coarse best models obtained for each classifier.

**Table S13.** Hyperparameters associated to models MN6-MN9. The list is reported as python dictionaries.

1.3. 10000 random iterations.

**Table S14.** Refined best models obtained for each classifier.

**Table S15.** Hyperparameters associated to models MN10-MN13. The list is reported as python dictionaries.

1.4. 100000 random iterations.

**Table S16.** Refined best models obtained for each classifier.

**Table S17.** Hyperparameters associated to models **MN14-MN16**. The list is reported as python dictionaries.

## **2. DPPH<sup>•</sup>**

2.1. 100 random iterations.

**Table S18.** Coarse best models obtained for each classifier.

**Table S19.** Hyperparameters associated to models **DPPH1-DPPH5**. The list is reported as python dictionaries.

2.2. 1000 random iterations.

**Table S20.** Coarse best models obtained for each classifier.

**Table S21.** Hyperparameters associated to models **DPPH6-DPPH10**. The list is reported as python dictionaries.

2.3. 10000 random iterations.

**Table S22.** Refined best models obtained for each classifier.

**Table S23.** Hyperparameters associated to models **DPPH11-DPPH13**. The list is reported as python dictionaries.

2.4. 100000 random iterations.

**Table S24.** Refined best models obtained for each classifier.

**Table S25.** Hyperparameters associated to models **DPPH14-DPPH16**. The list is reported as python dictionaries.

## **3. LOO<sup>•</sup>**

3.1. 100 random iterations.

**Table S26.** Coarse best models obtained for each classifier.

**Table S27.** Hyperparameters associated to models **LOO1-LOO5**. The list is reported as python dictionaries.

3.2. 1000 random iterations.

**Table S28.** Coarse best models obtained for each classifier.

**Table S29.** Hyperparameters associated to models **LOO6-LOO10**. The list is reported as python dictionaries.

3.3. 10000 random iterations.

**Table S30.** Refined best models obtained for each classifier.

**Table S31.** Hyperparameters associated to models **LOO10-LOO14**. The list is reported as python dictionaries.

3.4. 100000 random iterations.

**Table S32.** Refined best models obtained for each classifier.

**Table S33.** Hyperparameters associated to models **LOO15-LOO17**. The list is reported as python dictionaries.

## **4. ABTS<sup>••</sup>**

4.1. 100 random iterations.

**Table S34.** Coarse best models obtained for each classifier.

**Table S35.** Hyperparameters associated to models **ABTS1-ABTS5**. The list is reported as python dictionaries.

4.2. 1000 random iterations.

**Table S36.** Coarse best models obtained for each classifier.

**Table S37.** Hyperparameters associated to models **ABTS6-ABTS10**. The list is reported as python dictionaries.

4.3. 10000 random iterations.

**Table S38.** Refined best models obtained for each classifier.

**Table S39.** Hyperparameters associated to models **ABTS11-ABTS14**. The list is reported as python dictionaries.

4.4. 100000 random iterations.

**Table S40.** Refined best models obtained for each classifier.

**Table S41.** Hyperparameters associated to models **ABTS15-ABTS17**. The list is reported as python dictionaries.

## **5. OH<sup>•</sup>**

5.1. 100 random iterations.

**Table S42.** Coarse best models obtained for each classifier.

**Table S43.** Hyperparameters associated to models **OH1-OH5**. The list is reported as python dictionaries.

5.2. 1000 random iterations.

**Table S44.** Coarse best models obtained for each classifier.

**Table S45.** Hyperparameters associated to models **OH6-OH10**. The list is reported as python dictionaries.

5.3. 10000 random iterations.

**Table S46.** Refined best models obtained for each classifier.

**Table S47.** Hyperparameters associated to models **OH11-OH14**. The list is reported as python dictionaries.

5.4. 100000 random iterations.

**Table S48.** Refined best models obtained for each classifier.

**Table S49.** Hyperparameters associated to models **OH15-OH16**. The list is reported as python dictionaries.

## 6. ROO-RBD<sub>50s</sub>

6.1. 100 random iterations.

**Table S50.** Coarse best models obtained for each classifier.

**Table S51.** Hyperparameters associated to models **ROO1-ROO5**. The list is reported as python dictionaries.

6.2. 1000 random iterations.

**Table S52.** Coarse best models obtained for each classifier.

**Table S53.** Hyperparameters associated to models **ROO6-ROO9**. The list is reported as python dictionaries.

6.3. 10000 random iterations.

**Table S54.** Refined best models obtained for each classifier.

**Table S55.** Hyperparameters associated to models **ROO10-ROO13**. The list is reported as python dictionaries.

6.4. 100000 random iterations.

**Table S56.** Refined best models obtained for each classifier.

**Table S57.** Hyperparameters associated to models **ROO14-ROO16**. The list is reported as python dictionaries.

## 7. OH-RBD<sub>50</sub>

7.1. 100 random iterations.

**Table S58.** Coarse best models obtained for each classifier.

**Table S59.** Hyperparameters associated to models **OH-RBD1-OH-RBD5**. The list is reported as python dictionaries.

7.2. 1000 random iterations.

**Table S60.** Coarse best models obtained for each classifier.

**Table S61.** Hyperparameters associated to models **OH-RBD6-OH-RBD10**. The list is reported as python dictionaries.

7.3. 10000 random iterations.

**Table S62.** Refined best models obtained for each classifier.

**Table S63.** Hyperparameters associated to models **OH-RBD11-OH-RBD13**. The list is reported as python dictionaries.

7.4. 100000 random iterations.

**Table S64.** Refined best models obtained for each classifier.

**Table S65.** Hyperparameters associated to models **OH-RBD14-OH-RBD16**. The list is reported as python dictionaries.

**Figure S1.** Protective effect of Chamomile morocco EO against peroxy (A) and hydroxyl (B) radicals-induced DNA damage. DNA from salmon sperm (lane 1, negative control), DNA damage control (lane 2, positive control), quercetin (lane 3, 100 µg/mL, standard), essential oils in concentrations of 25, 50, 100, 200, and 400 µg/mL (lanes 4, 5, 6, 7, and 8). \*p < 0.05 when compared with the negative control group †p < 0.05 when compared with the positive control group.

**Figure S2.** Protective effect of Clary sage EO against peroxy (A) and hydroxyl (B) radicals-induced DNA damage. DNA from salmon sperm (lane 1, negative control), DNA damage control (lane 2, positive control), quercetin (lane 3, 100 µg/mL, standard), essential oils in concentrations of 25, 50, 100, 200, and 400 µg/mL (lanes 4, 5, 6, 7, and 8). \*p < 0.05 when compared with the negative control group †p < 0.05 when compared with the positive control group.

**Figure S3.** Protective effect of Sage EO against peroxy (A) and hydroxyl (B) radicals-induced DNA damage. DNA from salmon sperm (lane 1, negative control), DNA damage control (lane 2, positive control), quercetin (lane 3, 100 µg/mL, standard), essential oils in concentrations of 25, 50, 100, 200, and 400 µg/mL (lanes 4, 5, 6, 7, and 8). \*p < 0.05 when compared with the negative control group †p < 0.05 when compared with the positive control group.

**Figure S4.** Protective effect of Red thyme EO against peroxy (A) and hydroxyl (B) radicals-induced DNA damage. DNA from salmon sperm (lane 1, negative control), DNA damage control (lane 2, positive control), quercetin (lane 3, 100 µg/mL, standard), essential oils in concentrations of 25, 50, 100, 200, and 400 µg/mL (lanes 4, 5, 6, 7, and 8). \*p < 0.05 when compared with the negative control group †p < 0.05 when compared with the positive control group.

**Figure S5.** Protective effect Tea tree EO against peroxy (A) and hydroxyl (B) radicals-induced DNA damage. DNA from salmon sperm (lane 1, negative control), DNA damage control (lane 2, positive control), quercetin (lane 3, 100 µg/mL, standard), essential oils in concentrations of 25, 50, 100, 200, and 400 µg/mL (lanes 4, 5, 6, 7, and 8). \*p < 0.05 when compared with the negative control group †p < 0.05 when compared with the positive control group.

**Figure S6.** Protective effect of Melissa EO against peroxy (A) and hydroxyl (B) radicals-induced DNA damage. DNA from salmon sperm (lane 1, negative control), DNA damage control (lane 2, positive control), quercetin (lane 3, 100 µg/mL, standard), essential oils in concentrations of 25, 50, 100, 200, and 400 µg/mL (lanes 4, 5, 6, 7, and 8). \*p < 0.05 when compared with the negative control group †p < 0.05 when compared with the positive control group.

**Figure S7.** Protective effect of Mountain pine EO against peroxy (A) and hydroxyl (B) radicals-induced DNA damage. DNA from salmon sperm (lane 1, negative control), DNA damage control (lane 2, positive control), quercetin (lane 3, 100









µg/mL, standard), essential oils in concentrations of 25, 50, 100, 200, and 400 µg/mL (lanes 4, 5, 6, 7, and 8). \*p < 0.05 when compared with the negative control group †p < 0.05 when compared with the positive control group.

**Figure S60.** Partial dependence graphs of limonene in the model of M<sup>nt</sup> (A), DPPH• (B), LOO• (C), ABTS<sup>•+</sup> (D), OH• (E), ROO-RBD<sub>50</sub> (F), HO-RBD<sub>50</sub> (G).

**Figure S61.** Partial dependence graphs of thymol in the model of M<sup>nt</sup> (A), DPPH• (B), LOO• (C), ABTS<sup>•+</sup> (D), OH• (E), ROO-RBD<sub>50</sub> (F), HO-RBD<sub>50</sub> (G).

**Figure S62.** Partial dependence graphs of eugenol in the model of M<sup>nt</sup> (A), DPPH• (B), LOO• (C), ABTS<sup>•+</sup> (D), OH• (E), ROO-RBD<sub>50</sub> (F), HO-RBD<sub>50</sub> (G).

**Figure S63.** Partial dependence graphs of chrysanthone in the model of M<sup>nt</sup> (A), DPPH• (B), LOO• (C), ABTS<sup>•+</sup> (D), OH• (E), ROO-RBD<sub>50</sub> (F), HO-RBD<sub>50</sub> (G).

**Figure S64.** Partial dependence graphs of chrysanthone in the model of M<sup>nt</sup> (A), DPPH• (B), LOO• (C), ABTS<sup>•+</sup> (D), OH• (E), ROO-RBD<sub>50</sub> (F), HO-RBD<sub>50</sub> (G).

**Figure S65.** Partial dependence graphs of α-pinene in the model of M<sup>nt</sup> (A), DPPH• (B), LOO• (C), ABTS<sup>•+</sup> (D), OH• (E), ROO-RBD<sub>50</sub> (F), HO-RBD<sub>50</sub> (G).

**Figure S66.** Partial dependence graphs of caryophyllene in the model of M<sup>nt</sup> (A), DPPH• (B), LOO• (C), ABTS<sup>•+</sup> (D), OH• (E), ROO-RBD<sub>50</sub> (F), HO-RBD<sub>50</sub> (G).

**Figure S67.** Partial dependence graphs of *p*-cymene in the model of M<sup>nt</sup> (A), DPPH• (B), LOO• (C), ABTS<sup>•+</sup> (D), OH• (E), ROO-RBD<sub>50</sub> (F), HO-RBD<sub>50</sub> (G).

## Results

ABTS cation radical neutralizing activity of EOs.

Antigenotoxic activity *in vitro*.

EOs with increasing dose-dependent potency to protect DNA from ROO• and OH•.

EOs with decreasing dose-dependent potency to protect from ROO• and OH•.

EOs with increasing and decreasing dose-dependent potency to protect DNA from ROO• and OH•, respectively.

EOs with decreasing and increasing dose-dependent potency to protect DNA from ROO• and OH•, respectively.

Liver redox status.

The *r*TBARS concentrations.

The *r*SOD catalytic activities.

The *r*CAT catalytic activities.

The *r*GSH concentrations.

The hepatocytes toxicity status.

The *r*AST and *r*ALT catalytic activities.

The *r*ALP and γ-GT catalytic activities.

Kidneys redox status.

The *r*TBARS concentrations.

The *r*SOD catalytic activities.

The *r*CAT catalytic activities.

The *r*GSH concentration.

Chronic kidney disease markers.

The *r*XO catalytic activities.

The *r*XO catalytic activities.

The *r*NO concentrations.

The GPx catalytic activities.

EOs antigenotoxic activity *in vivo*.

Antigenotoxicity in liver.

Antigenotoxicity in kidneys.

**Table S1.** Investigated essential oils and their previously literature-reported chemical compositions and antioxidant features.

| EOs IDs<br><i>Official Latin<br/>names of<br/>biological<br/>source/sources</i> | Components<br>(%)                                                                                                                                                       | TAC <sup>a</sup><br>μg<br>AAE/mg | M <sup>n+b</sup>   | DPPH <sup>•c</sup><br>EC <sub>50</sub> <sup>i</sup> (μg/mL) | LOO <sup>•d</sup> | ABTS <sup>•+e</sup> | OH <sup>•f</sup> | Ref. |
|---------------------------------------------------------------------------------|-------------------------------------------------------------------------------------------------------------------------------------------------------------------------|----------------------------------|--------------------|-------------------------------------------------------------|-------------------|---------------------|------------------|------|
| Chamomile<br>Morocco<br><i>Cladanthus<br/>mixtus</i> (L.)<br>Chevall.           | tiglic aldehyde<br>(36 %)<br>methacrylate<br>(34 %)                                                                                                                     | NPR <sup>g</sup>                 | NPR                | 342 ± 0.2                                                   | NPR               | NPR                 | NPR              | [21] |
| Clary sage<br><i>Salvia sclarea</i><br>L.                                       | linalyl acetate (62.6%)<br>linalool<br>(11.1%)                                                                                                                          | NPR                              | NPR                | 7.79 ±1.06                                                  | NPR               | 2.26 ± 0.05         | NPR              | [22] |
| Sage oil<br><i>Salvia<br/>officinalis</i> L.                                    | <i>cis</i> -thujone<br>(43.2%)<br>camphor<br>(17.6%)<br>1,8-cineole<br>(13.8%)                                                                                          | NPR                              | NPR                | 6160-9650                                                   | NPR               | 43.64 ±<br>2.51     | NPR              | [23] |
|                                                                                 |                                                                                                                                                                         | NPR                              | 126.85 -<br>212.91 | 113.56 -<br>88.43                                           | NPR               | 141.55 -<br>244.65  | NPR              | [94] |
|                                                                                 | 1,8-cineole<br>(30.3%)<br>camphor<br>(17.1%)                                                                                                                            | NPR                              | NPR                | 14.10 ±<br>0.17                                             | NPR               | NPR                 | NPR              | [22] |
| Red thyme<br><i>Thymus<br/>praecox</i> Opiz<br>"coccineus "                     | NPR                                                                                                                                                                     | NPR                              | NPR                | NPR                                                         | NPR               | NPR                 | NPR              |      |
| Tea tree<br><i>Melaleuca<br/>alternifolia</i><br>(Maiden &<br>Betcher)<br>Cheel | 4-carvomenthenol<br>(31.11%)<br>γ-terpinene<br>(25.30%)<br>α-terpinene<br>(12.70%)<br>4-carvomenthenol<br>(40.44%)<br>γ-terpinene<br>(19.54%)<br>α-terpinene<br>(7.69%) | NPR                              | NPR                | 48.35                                                       | 135.9             | NPR                 | 43.71            | [24] |
|                                                                                 |                                                                                                                                                                         | NPR                              | NPR                | 12.5                                                        | NPR               | NPR                 | NPR              | [25] |
| Melissa<br><i>Melissa<br/>officinalis</i> L.                                    | NPR                                                                                                                                                                     | NPR                              | 472.50 ±<br>0.20   | 7.58                                                        | NPR               | 73.65 ±<br>0.07     | NPR              | [26] |
|                                                                                 | NPR                                                                                                                                                                     | NPR                              | NPR                | 62.38 ±<br>0.63                                             | NPR               | NPR                 |                  | [27] |

|                                                                                     |                                 |     |                  |                |                |                |     |      |
|-------------------------------------------------------------------------------------|---------------------------------|-----|------------------|----------------|----------------|----------------|-----|------|
| Mountain<br>pine<br><i>Pinus mugo</i><br>Turra                                      | 3-carene<br>(12.11-18.74%)      | NPR | NPR              | 2510 -<br>4260 | NPR            | 43.08<br>±6.95 | NPR | [28] |
|                                                                                     | α-pinene<br>(7.21-12.92%)       |     |                  |                |                |                |     |      |
|                                                                                     | β-pinene<br>(43.3%)             | NPR | NPR              | 3.08 ± 0.65    | NPR            | NPR            | NPR | [29] |
|                                                                                     | α-pinene<br>(16.6%)             |     |                  |                |                |                |     |      |
|                                                                                     | β-phellandrene<br>(16%)         |     |                  |                |                |                |     |      |
|                                                                                     | limonene<br>(9.5%)              |     |                  |                |                |                |     |      |
| Geranium<br>Bourbon<br><i>Pelargonium x</i><br><i>asperum</i><br>Ehrh. ex<br>Willd. | 3-carene<br>(12.11-18.74 %)     | NPR | NPR              | 2510 -<br>4260 | 2590 -<br>4140 | NPR            | NPR | [29] |
|                                                                                     | α-pinene<br>(7.21-12.92%)       |     |                  |                |                |                |     |      |
|                                                                                     | germacrene D<br>(2.38-11.81 %)  |     |                  |                |                |                |     |      |
|                                                                                     | citronellol<br>(25.07%)         | NPR | NPR              | 14620          | NPR            | NPR            | NPR | [30] |
|                                                                                     | citronellyl acetate<br>(10.52%) |     |                  |                |                |                |     |      |
|                                                                                     | geraniol<br>(10.46%)            |     |                  |                |                |                |     |      |
| Oregano<br><i>Origanum</i><br><i>vulgare</i> L.                                     | NPR                             | NPR | NPR              | 16990          | NPR            | NPR            | NPR | [31] |
|                                                                                     | carvacrol<br>(30.73%)           | NPR | NPR              | 332 ± 0.040    | NPR            | NPR            | NPR | [32] |
|                                                                                     | thymol<br>(18.81%)              |     |                  |                |                |                |     |      |
|                                                                                     | <i>p</i> -cymene<br>(10.88%)    |     |                  |                |                |                |     |      |
|                                                                                     | NPR                             | NPR | NPR              | 2.99           | NPR            | NPR            | NPR | [33] |
|                                                                                     | thymol<br>(45%)                 | NPR | NPR              | 590            | NPR            | NPR            | NPR | [34] |
| Ylang-ylang<br><i>Cananga</i><br><i>odorata</i><br>(Lam.) Hook.<br>f. &<br>Thomson  | carvacrol<br>(37.4%)            |     |                  |                |                |                |     |      |
|                                                                                     | α-farnesene<br>(10.33%)         | NPR | NPR              | 1030 ± 20      | NPR            | NPR            | NPR | [35] |
|                                                                                     | linalool<br>(9.97%)             |     |                  |                |                |                |     |      |
|                                                                                     | α-amorphene<br>(9.4%)           |     |                  |                |                |                |     |      |
|                                                                                     | geraniol<br>(7.54%)             |     |                  |                |                |                |     |      |
|                                                                                     | linalool<br>(60.06%)            | NPR | 159.70 ±<br>0.13 | 21050          | NPR            | 1397 ±<br>3.13 | NPR | [36] |
| Coriander<br><i>Coriandrum</i><br><i>sativum</i> L.                                 | NPR                             | NPR | NPR              | 97.84          | NPR            | NPR            | NPR | [37] |
|                                                                                     | NPR                             | NPR | NPR              | 147            | NPR            | NPR            | NPR | [26] |

|                                                    |                                         |     |               |               |     |               |     |      |
|----------------------------------------------------|-----------------------------------------|-----|---------------|---------------|-----|---------------|-----|------|
|                                                    | NPR                                     | NPR | NPR           | 385.00 ± 1.21 | NPR | NPR           | NPR | [38] |
| Lavander<br><i>Lavandula angustifolia</i> Mill.    | linalool (24.63%)                       | NPR | NPR           | 216           | NPR | 42.60±0.22    | NPR | [39] |
|                                                    | camphor (13.58%)                        |     |               |               |     |               |     |      |
|                                                    | linalyl acetate (8.89%)                 |     |               |               |     |               |     |      |
|                                                    | linalool (37.65%)                       | NPR | NPR           | 60.53±0.21    | NPR | NPR           | NPR | [40] |
|                                                    | linalyl acetate (15.29%)                |     |               |               |     |               |     |      |
|                                                    | 1,8-cineole (21.5%)                     | NPR | NPR           | 133           | NPR | NPR           | NPR | [41] |
| Myrtle<br><i>Myrtus communis</i> L.                | linalool (44.94%)                       |     |               |               |     |               |     |      |
|                                                    | α-pinene (48.9%)                        | NPR | NPR           | 941           | NPR | NPR           | NPR | [42] |
|                                                    | 1,8-cineole (15.3%)                     |     |               |               |     |               |     |      |
|                                                    | α-pinene (24.83%)                       | NPR | NPR           | 794.75        | NPR | NPR           | NPR | [43] |
|                                                    | 1,8-cineole (10.8%)                     |     |               |               |     |               |     |      |
| Garlic<br><i>Allium sativum</i> L.                 | diallyl trisulfide (44.21%)             | NPR | 146.40 ± 0.03 | 124.60        | NPR | 159.60 ± 0.02 | NPR | [44] |
|                                                    | diallyl disulfide (22.08%)              |     |               |               |     |               |     |      |
|                                                    | allyl methyl trisulfide (9.72%)         |     |               |               |     |               |     |      |
|                                                    | NPR                                     | NPR | NPR           | 300           | NPR | NPR           | NPR | [26] |
|                                                    | diallyl disulfide (49.1%)               | NPR | NPR           | 165.80 ± 0.20 | NPR | NPR           | NPR | [45] |
|                                                    | diallyl trisulfide (30.38%)             |     |               |               |     |               |     |      |
| Cardamom<br><i>Elettaria cardamomum</i> (L.) Maton | NPR                                     | NPR | NPR           | 29.53         | NPR | NPR           | NPR | [36] |
| Mandarin<br><i>Citrus reticulata</i> Blanco        | limonene (76.5%)                        | NPR | 105           | 890           | NPR | NPR           | NPR | [47] |
|                                                    | p-cymene (16.7%)                        |     |               |               |     |               |     |      |
|                                                    | γ-terpinene (47.89%)                    | NPR | NPR           | 79.84         | NPR | NPR           | NPR | [48] |
|                                                    | methyl 2-(methylamino)benzoate (13.17%) |     |               |               |     |               |     |      |
| Hyssop<br><i>Hyssopus officinalis</i> L.           | camphor (23.61%)                        | NPR | NPR           | 11.22         | NPR | NPR           | NPR | [49] |
|                                                    | β-pinene (21.91%)                       |     |               |               |     |               |     |      |
|                                                    | isopinocamphe                           | NPR | NPR           | 16.37         | NPR | NPR           | NPR | [50] |

|                                                               |                                                                |     |                  |                    |     |                  |     |      |
|---------------------------------------------------------------|----------------------------------------------------------------|-----|------------------|--------------------|-----|------------------|-----|------|
|                                                               | (57.27%)<br>β-pinene<br>(7.23%)<br>4-carvomenthenol<br>(7.13%) |     |                  |                    |     |                  |     |      |
| Grapefruit<br><i>Citrus<br/>paradisi<br/>Macfad.</i>          | limonene<br>(93.33%)                                           | NPR | NPR              | 22060              | NPR | 15720            | NPR | [51] |
|                                                               | limonene<br>(56.31%)                                           | NPR | 98               | 12420              | NPR | NPR              | NPR | [48] |
|                                                               | myrcene<br>(35.83%)                                            |     |                  |                    |     |                  |     |      |
| Lemongrass<br><i>Cymbopogon<br/>citratius<br/>(DC.) Stapf</i> | NPR                                                            | NPR | 794.80 ±<br>0.28 | 601.60 ±<br>0.53   | NPR | 253.20 ±<br>0.34 | NPR | [26] |
| Siberian Pine<br><i>Abies sibirica<br/>Ledeb.</i>             | NPR                                                            | NPR | NPR              | NPR                | NPR | NPR              | NPR |      |
|                                                               | neral<br>(28.7-34.1%)                                          | NPR | NPR              | 28133              | NPR | 117220           | NPR | [52] |
| Camphor<br><i>Cinnamomum<br/>camphora (L.)<br/>J. Presl</i>   | citral<br>(31.8-44.7%)                                         | NPR | NPR              | 12229              | NPR | 66900            | NPR | [52] |
|                                                               |                                                                | NPR | NPR              | 7527               | NPR | 37870            | NPR | [52] |
|                                                               |                                                                | NPR | NPR              | 7065               | NPR | 29910            | NPR | [52] |
| Cade<br><i>Juniperus<br/>oxycedrus L</i>                      | α-pinene<br>(67.33%)                                           | NPR | NPR              | 22.14±1.16<br>6.56 | NPR | NPR              | NPR | [53] |
|                                                               | 3-carene<br>(7.21%)                                            |     |                  |                    |     |                  |     |      |
|                                                               | NPR                                                            | NPR | NPR              | 6.56               | NPR | NPR              | NPR | [54] |
| Cedar leaves<br><i>Thuja<br/>occidentalis L.</i>              | NPR                                                            | NPR | NPR              | NPR                | NPR | NPR              | NPR |      |
| Ginger<br><i>Zingiber<br/>officinale<br/>Roscoe</i>           | NPR                                                            | NPR | 363.90 ±<br>0.24 | 129.40 ±<br>0.26   | NPR | 275 ± 0.82       | NPR | [26] |
| Cumin<br><i>Cuminum<br/>cuminum L.</i>                        | 4-<br>isopropylbenzaldehyde<br>(30.42–33.24 %)                 | NPR | 17020            | 3320               | NPR | NPR              | NPR | [55] |
|                                                               | <i>p</i> -mentha-1,4-dien-7-al<br>(20.54–28.36 %)              |     |                  |                    |     |                  |     |      |
|                                                               | patchouli alcohol<br>(18.12%)                                  | NPR | NPR              | 22.45 ±<br>0.30    | NPR | NPR              | NPR | [57] |
| Patchouli<br><i>Pogostemon<br/>cablin Benth.</i>              | (+)-γ-curcumene<br>(35.07%)                                    |     |                  |                    |     |                  |     |      |
|                                                               | patchouli alcohol<br>(26.31%)                                  | NPR | NPR              | 19.87 ±<br>0.40    | NPR | NPR              | NPR | [57] |
|                                                               | (+)-γ-curcumene<br>(34.79%)                                    |     |                  |                    |     |                  |     |      |

|                                                                                                        |                                    |     |                 |                  |      |                 |       |      |
|--------------------------------------------------------------------------------------------------------|------------------------------------|-----|-----------------|------------------|------|-----------------|-------|------|
| Orange bitter<br><i>Citrus aurantium</i> L.                                                            | limonene<br>(57.57%)               | NPR | 20.62 ±<br>2.36 | 1040 ± 0.9       | NPR  | 25.31 ±<br>2.66 | NPR   | [56] |
|                                                                                                        | linalool<br>(8.01%)                |     |                 |                  |      |                 |       |      |
|                                                                                                        | D-limonene<br>(76.00-89.17%)       | NPR | NPR             | 33.01 ±<br>1.71  | NPR  | 25.31 ±<br>2.66 | NPR   | [58] |
|                                                                                                        | linalool<br>(59%)                  | NPR | NPR             | 4786             | 652  | NPR             | NPR   | [95] |
|                                                                                                        | linalyl acetate<br>(23%)           |     |                 |                  |      |                 |       |      |
| Eucalyptus<br><i>Eucalyptus globulus</i> Labill.                                                       | 1,8-cineole<br>(13.23%)            | NPR | 2000            | 740              | NPR  | NPR             | NPR   | [24] |
|                                                                                                        | <i>p</i> -cymene<br>(32.19-37.82%) |     |                 |                  |      |                 |       |      |
|                                                                                                        | 1,8-cineole<br>(95.61%)            | NPR | NPR             | 57               | NPR  | NPR             | NPR   | [59] |
|                                                                                                        | 1,8-cineole<br>(38%)               | NPR | NPR             | NPR              | 1109 | NPR             | NPR   | [95] |
|                                                                                                        | limonene<br>(58%)                  |     |                 |                  |      |                 |       |      |
| Pine silvestre<br>natural                                                                              | NPR                                | NPR | NPR             | NPR              | NPR  | NPR             | NPR   |      |
| Bergamot<br><i>Citrus limon</i> (L.) Osbeck<br>(syn. <i>Citrus</i> ×<br><i>bergamia</i> Risso & Poit.) | limonene<br>(31.58%)               | NPR | NPR             | 212              | NPR  | NPR             | NPR   | [60] |
|                                                                                                        | linalool<br>(21.47%)               |     |                 |                  |      |                 |       |      |
|                                                                                                        |                                    |     |                 |                  |      |                 |       |      |
| Juniper<br><i>Juniperus communis</i> L.                                                                | α-pinene<br>(35.4%)                | NPR | NPR             | 944              | NPR  | NPR             | 0.024 | [61] |
|                                                                                                        | myrcene<br>(15.3%)                 |     |                 |                  |      |                 |       |      |
| Birch<br><i>Betula lenta</i> L.                                                                        | NPR                                | NPR | NPR             | NPR              | NPR  | NPR             | NPR   |      |
|                                                                                                        |                                    |     |                 |                  |      |                 |       |      |
| Fennel<br><i>Foeniculum vulgare</i> Mill.                                                              | anethole<br>(15.23%-90.11%)        | NPR | NPR             | 11830 -<br>36900 | NPR  | 7650 -<br>20130 | NPR   | [63] |
|                                                                                                        | estragole<br>(4.00-63.72%)         |     |                 |                  |      |                 |       |      |
|                                                                                                        | fenchone<br>(0.03-12.62%)          |     |                 |                  |      |                 |       |      |
|                                                                                                        | limonene<br>(1.05-13.04%)          |     |                 |                  |      |                 |       |      |
|                                                                                                        | anethole<br>(64-75.5%)             | NPR | NPR             | 12370 -<br>37200 | NPR  | NPR             | NPR   | [64] |
|                                                                                                        | α-phellandrene<br>(11.0%)          |     |                 |                  |      |                 |       |      |
|                                                                                                        | fenchone<br>(4.8-13.7%)            |     |                 |                  |      |                 |       |      |
|                                                                                                        | estragole<br>(9.5-10.3%)           |     |                 |                  |      |                 |       |      |
|                                                                                                        | anethole                           | NPR | NPR             | NPR              | 652  | NPR             | NPR   | [95] |
|                                                                                                        |                                    |     |                 |                  |      |                 |       |      |

|                                                                        |                                                                                                            |     |                    |                   |                 |                  |       |      |
|------------------------------------------------------------------------|------------------------------------------------------------------------------------------------------------|-----|--------------------|-------------------|-----------------|------------------|-------|------|
| Cedar fruit<br><i>Citrus medica</i><br>L.                              | (75%)<br>limonene<br>(33.60%)<br>myristicin<br>(24.36%)                                                    | NPR | NPR                | 19.59 ±<br>0.01   | NPR             | NPR              | NPR   | [65] |
|                                                                        | limonene<br>(67.1%)<br>$\alpha$ -pinene<br>(11.0%)<br>$\alpha$ -terpinene<br>(8.0%)                        | NPR | 730                | 15.056            | NPR             | NPR              | NPR   | [66] |
| Lemon<br><i>Citrus limon</i><br>(L.) Osbeck                            | limonene<br>(67.1%)<br>$\alpha$ -pinene<br>(11.0%)<br>$\alpha$ -terpinene<br>(8.0%)                        | NPR | 113.63 -<br>180.90 | 660               | NPR             | NPR              | NPR   | [67] |
|                                                                        | D-limonene<br>(48.56-53.44%)<br>$\beta$ -pinene<br>(17.37-18.29%)<br>$\gamma$ -terpinene<br>(12.33-12.84%) | NPR | NPR                | 40.57 -<br>100.22 | NPR             | NPR              | NPR   | [68] |
|                                                                        | limonene<br>(99%)                                                                                          | NPR | NPR                | 16145             | 3193            | NPR              | NPR   | [95] |
|                                                                        | chamazulene<br>(27.80 %)<br>$\beta$ -pinene<br>(7.93 %)<br>1,8-cineole<br>(7.51 %)                         | NPR | NPR                | 195.8             | NPR             | NPR              | NPR   | [69] |
| Roman<br>chamomile<br><i>Chamaemelum</i><br><i>nobile</i> (L.)<br>All. | carvacrol<br>(41.5%)<br><i>p</i> -cymene<br>(11.0%)<br>thymol<br>(8.6%)                                    | NPR | NPR                | 18.7              | NPR             | NPR              | 0.007 | [70] |
| Savory<br><i>Satureja</i><br><i>montana</i> L.                         | carvacrol<br>(53.35%)<br>$\gamma$ -terpinene<br>(13.54%)<br><i>p</i> -cymene<br>(13.03%)                   | NPR | NPR                | 410.5 ±<br>4.27   | NPR             | NPR              | NPR   | [62] |
|                                                                        | $\alpha$ -pinene<br>(24.6%)<br>1,8-cineole<br>(14.1%)<br>camphor<br>(13.5%)                                | NPR | 195.90 ±<br>0.24   | 444.30 ±<br>0.58  | NPR             | 484.10 ±<br>0.58 | NPR   | [71] |
| Rosemary<br><i>Rosmarinus</i><br><i>officinalis</i> L.                 | 1,8-cineole<br>(14.1%)<br>camphor<br>(13.5%)                                                               | NPR | NPR                | 24800             | NPR             | NPR              | NPR   | [26] |
|                                                                        | 1,8-cineole<br>(42.86-46.76%)<br>camphor<br>(16.26-23.42%)                                                 | NPR | NPR                | 16450 -<br>23800  | 7024 -<br>13340 | NPR              | NPR   | [96] |
|                                                                        |                                                                                                            |     |                    |                   |                 |                  |       |      |

|                                                                      |                                                  |                   |                 |                   |     |                 |     |                      |
|----------------------------------------------------------------------|--------------------------------------------------|-------------------|-----------------|-------------------|-----|-----------------|-----|----------------------|
| Ceylon<br>cinnamon<br>peel<br><i>Cinnamomum<br/>verum</i> J. Presl   | cinnamaldehyde<br>(58.7%)                        | 229.15 ±<br>29.54 | 25.18 ±<br>0.03 | 410               | NPR | 11.42 ±<br>0.10 | NPR | [72]                 |
|                                                                      | linalool<br>(5.8%)                               |                   |                 |                   |     |                 |     |                      |
|                                                                      | eugenol<br>(4.9 %)                               |                   |                 |                   |     |                 |     |                      |
|                                                                      | NPR                                              | NPR               | NPR             | 7.17 ± 0.17       | NPR | NPR             | NPR | [26]                 |
|                                                                      | cinnamicaldehyde<br>(35.04%)                     | NPR               | 68380           | 39800             | NPR | NPR             | NPR | [35]                 |
| <i>Eucalyptus<br/>globulus</i>                                       | 1,1-dimethoxyethane<br>(64.50%)                  |                   |                 |                   |     |                 |     |                      |
|                                                                      | NPR                                              | NPR               | NPR             | NPR               | NPR | NPR             | NPR | [24]<br>[59]<br>[95] |
|                                                                      |                                                  |                   |                 |                   |     |                 |     |                      |
| Orange<br>sweet<br><i>Citrus<br/>sinensis</i> (L.)<br>Osbeck         | limonene<br>(88.94%)                             | NPR               | 410             | 12                | NPR | NPR             | NPR | [59]                 |
| Niaouly<br><i>Melaleuca<br/>quinquenervia</i><br>(Cav.)<br>S.T.Blake | 1,8-cineole<br>(31%)                             | NPR               | NPR             | 44500             | NPR | NPR             | NPR | [95]                 |
|                                                                      | 2-(4-<br>methylphenyl)propan-<br>2-ol<br>(19.7%) |                   |                 |                   |     |                 |     |                      |
|                                                                      | <i>p</i> -cymene<br>(16.5%)                      |                   |                 |                   |     |                 |     |                      |
|                                                                      | $\alpha$ -terpineol<br>(9.91%)                   |                   |                 |                   |     |                 |     |                      |
| Artemisia<br><i>Artemisia<br/>vulgaris</i> L.                        | camphor<br>(39.9%)                               | NPR               | NPR             | 42000             | NPR | NPR             | NPR | [75]                 |
|                                                                      | $\beta$ -thujone<br>(15.63%)                     |                   |                 |                   |     |                 |     |                      |
| Cajeput<br><i>Melaleuca<br/>cajuputi</i><br>Powell                   | 1,8-cineole<br>(up to 43.0%)                     | NPR               | NPR             | 2400              | NPR | NPR             | NPR | [76]                 |
|                                                                      | viridiflorol<br>(24.2-47.6%)                     |                   |                 |                   |     |                 |     |                      |
| Black pepper<br><i>Piper nigrum</i><br>L.                            | caryophyllene<br>(25.38%)                        | NPR               | NPR             | 103.3 -<br>316.27 | NPR | NPR             | NPR | [77]                 |
|                                                                      | limonene<br>(15.64%)                             |                   |                 |                   |     |                 |     |                      |
|                                                                      | sabinene<br>(13.63%)                             |                   |                 |                   |     |                 |     |                      |
|                                                                      | 3-carene<br>(9.34%)                              |                   |                 |                   |     |                 |     |                      |
|                                                                      |                                                  |                   |                 |                   |     |                 |     |                      |
| White thyme<br><i>Thymus<br/>vulgaris</i> L.                         | carvacrol<br>(45,85%)                            | 350710            | NPR             | 5833              | NPR | 6460            | NPR | [78]                 |
|                                                                      | borneol<br>(22,46%)                              |                   |                 |                   |     |                 |     |                      |
|                                                                      | NPR                                              | NPR               | NPR             | 4050              | NPR | NPR             | NPR | [35]                 |
|                                                                      | NPR                                              | NPR               | NPR             | 9.69              | NPR | NPR             | NPR | [79]                 |

|                                                                        |                                   |     |                  |                  |     |                  |     |      |
|------------------------------------------------------------------------|-----------------------------------|-----|------------------|------------------|-----|------------------|-----|------|
| Marjoram<br><i>Origanum<br/>marjorana</i> L.                           | thymol<br>(42.13%)                | NPR | NPR              | 990 ± 20         | NPR | NPR              | NPR | [34] |
|                                                                        | <i>p</i> -cymene<br>(24%)         | NPR | NPR              | 259              | 116 | NPR              | NPR | [95] |
|                                                                        | borneol<br>(16%)                  |     |                  |                  |     |                  |     |      |
|                                                                        | thymol<br>(12%)                   |     |                  |                  |     |                  |     |      |
|                                                                        | carvacrol<br>(16%)                |     |                  |                  |     |                  |     |      |
|                                                                        | 4-carvomenthenol<br>(32.1-33.35%) | NPR | 374.80 ±<br>0.21 | 524.00 ±<br>3.42 | NPR | 162.00 ±<br>0.12 | NPR | [26] |
|                                                                        | linalool<br>(13.8-15.37%)         |     |                  |                  |     |                  |     |      |
|                                                                        | γ-terpinene<br>(9.5%)             |     |                  |                  |     |                  |     |      |
|                                                                        | <i>p</i> -cymene<br>(6.9%)        |     |                  |                  |     |                  |     |      |
|                                                                        | NPR                               | NPR | 372.72 ±<br>0.84 | 225.61 ±<br>0.05 | NPR | NPR              | NPR | [80] |
| Clove<br><i>Syzygium<br/>aromaticum</i><br>(L.) Merr. &<br>L. M. Perry | eugenol<br>(82.43%)               | NPR | 820              | 2.55 ± 0.40      | NPR | 5.81 ± 1.35      | NPR | [26] |
|                                                                        | caryophyllene<br>(8.97%)          |     |                  |                  |     |                  |     |      |
|                                                                        | NPR                               | NPR | 5.96 ± 0.71      | NPR              | NPR | NPR              | NPR | [35] |
| Cypress<br><i>Cupressus<br/>sempervirens</i><br>L.                     | α-pinene<br>(47.51%)              | NPR | NPR              | NPR              | NPR | 176.45           | NPR | [81] |
|                                                                        | α-pinene<br>(29.21%)              | NPR | NPR              | NPR              | NPR | NPR              | NPR | [82] |
|                                                                        | 3-carene<br>(18.92%)              |     |                  |                  |     |                  |     |      |
|                                                                        | cedrol<br>(12.25%)                |     |                  |                  |     |                  |     |      |
|                                                                        | isoterpinene<br>(7.66%)           |     |                  |                  |     |                  |     |      |
|                                                                        | α-pinene<br>(49%)                 | NPR | NPR              | 8245             | 766 | NPR              | NPR | [95] |
| Nutmeg<br>natural<br><i>Myristica<br/>fragrans</i><br>Houtt.           | 3-carene<br>(18%)                 |     |                  |                  |     |                  |     |      |
|                                                                        | limonene<br>(32%)                 |     |                  |                  |     |                  |     |      |
|                                                                        | sabinene<br>(42.3 %)              | NPR | NPR              | NPR              | NPR | NPR              | NPR | [83] |
| Peppermint<br><i>Mentha<br/>piperita</i> L.                            | menthol<br>(45.4%)                | NPR | 257.40 ±<br>0.88 | 6.88 ± 0.13      | NPR | 34.08 ±<br>0.13  | NPR | [26] |
|                                                                        | menthone<br>(21.8%)               |     |                  |                  |     |                  |     |      |
|                                                                        |                                   | NPR | NPR              | 58410            | NPR | NPR              | NPR | [84] |
|                                                                        |                                   | NPR | NPR              | 70290            | NPR | NPR              | NPR | [33] |

|                                                                                   |                                                                     |        |                   |                  |     |                 |     |      |
|-----------------------------------------------------------------------------------|---------------------------------------------------------------------|--------|-------------------|------------------|-----|-----------------|-----|------|
| Verbena<br><i>Aloysia<br/>citriodora</i><br>Palau                                 | citral<br>(18.7–21.1%)                                              | NPR    | NPR               | 9583             | NPR | 3080            | NPR | [85] |
|                                                                                   | neral<br>(15.3–16.2%)                                               | NPR    | NPR               | 6300             | NPR | NPR             | NPR | [86] |
| Basil<br><i>Ocimum<br/>basilicum</i> L.                                           | citral<br>(26.4%)                                                   |        |                   |                  |     |                 |     |      |
|                                                                                   | linalool<br>(39.9%)                                                 | NPR    | 1092.00 ±<br>1.61 | 309.60 ±<br>0.37 | NPR | 756.0 ±<br>3.36 | NPR | [87] |
|                                                                                   | estragole<br>(27.82%)                                               | NPR    | NPR               | 2                | NPR | NPR             | NPR | [26] |
|                                                                                   | linalool<br>(25.35%)<br>eugenol<br>(25.85%)<br>linalool<br>(13.41%) | NPR    | NPR               | 210              | NPR | NPR             | NPR | [33] |
| Palmarosa<br><i>Cymbopogon<br/>martini</i><br>(Roxb.)<br>W.Watson                 | NPR                                                                 | NPR    | NPR               | 125              | NPR | NPR             | NPR | [88] |
| Laurel<br><i>Laurus nobilis</i><br>L.                                             | 1,8-cineole<br>(42.2%)                                              | NPR    | 684.90 ±<br>1.03  | 152.40 ±<br>0.63 | NPR | 49.48 ±<br>0.06 | NPR | [26] |
|                                                                                   | α-pinene<br>(16.7%)<br>β-pinene<br>(13.6%)                          |        |                   |                  |     |                 |     |      |
|                                                                                   | NPR                                                                 | NPR    | NPR               | 0.18 ± 0.04      | NPR | NPR             |     | [22] |
| Natural anise<br>pure<br><i>Pimpinella<br/>anisum</i> L.                          | anethole<br>(84.21%)                                                | NPR    | 58650             | 114.87           | NPR | NPR             | NPR | [89] |
|                                                                                   | estragole<br>(3.82%)                                                |        |                   |                  |     |                 |     |      |
|                                                                                   | anethole<br>(94.82%)                                                | NPR    | 60                | 118              | NPR | NPR             | NPR | [90] |
| Incense<br><i>Boswellia</i> spp.                                                  | NPR                                                                 | NPR    | NPR               | NPR              | NPR | NPR             | NPR |      |
| <i>Mentha<br/>suaveolens</i><br>(Sicily)<br><i>Mentha<br/>suaveolens</i><br>Ehrh. | rotundifolone<br>(74.69%)                                           | 697.45 | 350               | 360              | NPR | NPR             | NPR | [91] |
|                                                                                   | menthol<br>(31.28%)                                                 | NPR    | NPR               | 64.76 ±<br>2.24  | NPR | NPR             | NPR | [92] |
|                                                                                   | isomenthol<br>(14.28%)<br>(+)-pulegone<br>(9.03%)                   |        |                   |                  |     |                 |     |      |
|                                                                                   |                                                                     | NPR    | NPR               | 200              | NPR | NPR             |     | [92] |
|                                                                                   |                                                                     | NPR    | NPR               | 16320            | NPR | NPR             |     | [92] |
|                                                                                   | p-cymene<br>(18.9%)<br>carvacrol                                    | NPR    | NPR               | 103              | NPR | NPR             | NPR | [93] |

|                                                                                         |                                      |     |     |     |            |     |     |     |       |
|-----------------------------------------------------------------------------------------|--------------------------------------|-----|-----|-----|------------|-----|-----|-----|-------|
| <i>Coridothymus capitatus</i> (Sicily)                                                  | (13.4%)<br>geranyl acetate           |     |     |     |            |     |     |     |       |
| <i>Thymbra capitata</i> (L.) Cav. (syn. <i>Thymus capitatus</i> (L.) Hoffmanns. & Link) | (12.2%)<br>borneol<br>(10.2%)<br>NPR | NPR | NPR | NPR | 102 ± 1.01 | NPR | NPR | NPR | [104] |
| <i>Thymus vulgaris</i> (Sicily)                                                         | NPR                                  | NPR | NPR | NPR | NPR        | NPR | NPR | NPR | [78]  |
| <i>Thymus vulgaris</i> L.                                                               |                                      |     |     |     |            |     |     |     | [35]  |
| <i>Origanum hirtum</i> (Sicily)                                                         |                                      |     |     |     |            |     |     |     | [79]  |
| <i>Origanum vulgare</i> subsp. <i>hirtum</i> (Link) Ietsw.                              |                                      |     |     |     |            |     |     |     | [34]  |
| <i>Origanum hirtum</i> (Sicily)                                                         | NPR                                  | NPR | NPR | NPR | NPR        | NPR | NPR | NPR |       |
| <i>Origanum vulgare</i> subsp. <i>hirtum</i> (Link) Ietsw.                              |                                      |     |     |     |            |     |     |     |       |

<sup>a</sup>Total antioxidant capacity <sup>b</sup>Metal ion chelating capacity <sup>c</sup>Neutralization of DPPH radical <sup>d</sup>Interruption of lipid peroxidation  
<sup>e</sup>Neutralization of ABTS cation radical <sup>f</sup>Neutralization of hydroxyl radical <sup>g</sup>Not previously reported.

**Table S2.** Herein investigated essential oils chemical compositions.

| EOs               | Components<br>(%)                                                                                                                                                                                                                                                                                                                                                                                                                                                                                                                                                                                                                                        |
|-------------------|----------------------------------------------------------------------------------------------------------------------------------------------------------------------------------------------------------------------------------------------------------------------------------------------------------------------------------------------------------------------------------------------------------------------------------------------------------------------------------------------------------------------------------------------------------------------------------------------------------------------------------------------------------|
| Chamomile Morocco | eucalyptol (2.03)<br>linalool (0.31)<br>$\alpha$ -pinene (14.39)<br>myrtenol (0.35)<br><i>o</i> -cymene (0.25)<br>pinocamphone (0.34)<br>4-carvomenthenol (0.41)<br>limonene (6.75)<br>myrcene (1.45)<br>isobornyl isovalerate (3.05)<br>borneol (1.20)<br>spathulenol (4.03)<br>bornyl butyrate (4.29)<br>artemisia alcohol (1.32)<br>isopinocarveol (7.43)<br>cedrelanol (2.63)<br>$\delta$ -cadinene (0.52)<br>caryophyllene oxide (1.29)<br>caryophyllene (1.04)<br>caryophyllene oxide (5.23)<br>yomogi alcohol (1.29)<br>germacrene D (4.54)<br><i>trans</i> -2,7-dimethyl-4,6-octadien-2-ol (33.21)<br>sativene (0.89)<br>$\beta$ -elemene (1.69) |
| Clary sage        | linalool (19.93)<br><i>p</i> -menth-1-en-8-ol (3.84)<br>copaene (0.59)<br>linalol oxide (2.15)<br>linalyl anthranilate (60.02)<br>myrcene (0.27)<br>$\alpha$ -bergamotene (0.77)<br>geraniol (1.67)<br>neryl acetate (5.72)<br>caryophyllene oxide (2.33)<br>caryophyllene (2.03)<br>$\beta$ -bisabolene (0.67)                                                                                                                                                                                                                                                                                                                                          |
| Sage oil          | camphor (21.32)<br>eucalyptol (11.69)<br>bornyl acetate (2.64)<br>camphene (3.46)<br>$\alpha$ -pinene (3.02)<br>$\gamma$ -terpinene (0.51)<br><i>o</i> -cymene (1.30)<br>chrysanthone (32.97)<br>4-carvomenthenol (0.61)<br>$\beta$ -pinene (1.42)<br>limonene (1.28)<br>borneol (4.62)<br>ledol (0.22)                                                                                                                                                                                                                                                                                                                                                  |

|               |                                      |
|---------------|--------------------------------------|
| Red thyme     | caryophyllene oxide (0.34)           |
|               | caryophyllene (6.83)                 |
|               | humulene (7.46)                      |
|               | humulene epoxide II (0.31)           |
|               | eucalyptol (0.25)                    |
|               | linalool (5.16)                      |
|               | $\alpha$ -pinene (0.38)              |
|               | thymol (66.31)                       |
|               | $\gamma$ -terpinene (2.27)           |
|               | $\alpha$ -terpinene (0.37)           |
|               | <i>p</i> -cymene (10.46)             |
|               | carvacrol (7.20)                     |
|               | 4-carvomenthenol (1.85)              |
|               | thymol methyl ether(0.23)            |
|               | <i>p</i> -menth-1-en-8-ol (0.22)     |
|               | limonene (0.29)                      |
|               | myrcene (0.46)                       |
|               | borneol (1.53)                       |
|               | $\alpha$ -citral (0.12)              |
|               | caryophyllene (2.32)                 |
| Tea tree      | eucalyptol (14.90)                   |
|               | $\alpha$ -pinene (11.15)             |
|               | $\gamma$ -terpinene (11.80)          |
|               | $\alpha$ -terpinene (4.57)           |
|               | <i>o</i> -cymene (3.47)              |
|               | 4-carvomenthenol (37.49)             |
|               | terpinolene (1.67)                   |
|               | $\beta$ -pinene (2.45)               |
|               | <i>p</i> -menth-1-en-8-ol (8.10)     |
|               | limonene (1.99)                      |
|               | myrcene (0.20)                       |
|               | ledol (0.44)                         |
|               | linalool oxide (0.23)                |
|               | longifolene (0.24)                   |
|               | viridiflorene (1.07)                 |
|               | $\alpha$ -gurjunene (0.24)           |
| Mountain pine | 4-isopropylbenzaldehyde (0.55)       |
|               | bornyl acetate (13.44)               |
|               | linalool (0.18)                      |
|               | $\alpha$ -pinene (12.52)             |
|               | <i>o</i> -cymene (2.14)              |
|               | $\beta$ -phellandrene (6.98)         |
|               | 2-(4-methylphenyl)propan-2-ol (0.85) |
|               | $\beta$ -pinene (7.63)               |
|               | D-carvone (0.28)                     |
|               | <i>p</i> -menth-1-en-8-ol (0.44)     |
|               | copaene (0.92)                       |
|               | limonene (10.95)                     |
|               | 3-carene (10.75)                     |
|               | 4-isopropyl-2-cyclohexenone (3.70)   |
|               | $\beta$ -cubebene (1.17)             |
|               | isopinocarveol (0.47)                |
|               | (+)- <i>cis</i> -verbenol (0.46)     |

|                  |                                                                                                                                                                                                                                                                                                                                                                                                                                                                                                                                                                                           |
|------------------|-------------------------------------------------------------------------------------------------------------------------------------------------------------------------------------------------------------------------------------------------------------------------------------------------------------------------------------------------------------------------------------------------------------------------------------------------------------------------------------------------------------------------------------------------------------------------------------------|
|                  | $\delta$ -cadinene (1.61)<br><i>trans</i> -2-carene-4-ol (0.59)<br>caryophyllene (21.41)<br>humulene (1.20)<br><i>trans</i> -calamenene (0.67)<br>$\alpha$ -muurolene (1.08)                                                                                                                                                                                                                                                                                                                                                                                                              |
| Geranium Bourbon | acetic acid (4.97)<br>linalool (9.65)<br>$\alpha$ -pinene (0.52)<br>1-indanone (3.77)<br>isomenthone (4.56)<br>citronellyl formate (8.00)<br>heptanoic acid (1.21)<br>citronellyl butyrate (1.55)<br>citronellol (26.30)<br>hexanoic acid (0.64)<br>6,10,14-trimethylpentadecan-2-one (0.43)<br><i>o</i> -cymene (1.35)<br>$\beta$ -pinene (1.23)<br>limonene (8.36)<br>linalyl anthranilate (6.78)<br>rose oxide (0.95)<br>myrcene (0.35)<br>geraniol (12.91)<br>geraniol formate (3.84)<br>geranyl propionate (0.79)<br>2,6-dimethyl-2,6-octadiene (0.62)<br>geranyl isobutyrate (1.23) |
| Oregano          | eucalyptol (0.37)<br>linalool (2.43)<br>$\alpha$ -pinene (0.37)<br>$\gamma$ -terpinene (1.93)<br>$\alpha$ -terpinene (0.33)<br><i>p</i> -cymene (6.80)<br>carvacrol (76.54)<br>4-carvomenthenol (0.54)<br>limonene (0.54)<br>myrcene (0.77)<br>borneol (0.45)<br>caryophyllene oxide (2.26)<br>caryophyllene (6.67)                                                                                                                                                                                                                                                                       |
| Coriander        | benzyl benzoate (6.41)<br>camphor (5.67)<br>eucalyptol (0.45)<br>linalool (66.67)<br>camphene (0.45)<br>$\alpha$ -pinene (3.41)<br>$\gamma$ -terpinene (0.93)<br>benzyl salicylate (2.20)<br><i>o</i> -cymene (2.51)<br>4-carvomenthenol (0.24)<br>$\beta$ -pinene (0.31)<br><i>p</i> -menth-1-en-8-ol (0.82)                                                                                                                                                                                                                                                                             |

Lavander

---

linalol oxide (0.62)  
limonene (1.75)  
myrcene (0.45)  
2,6-dimethyl-3,7-octadiene-2,6-diol (0.23)  
geraniol (1.71)  
neryl acetate (5.18)

---

Myrtle

eucalyptol (2.37)  
linalool (34.66)  
 $\alpha$ -pinene (0.22)  
linalyl acetate (41.43)  
4-carvomenthenol (3.77)  
3-octanol (0.31)  
*p*-menth-1-en-8-ol (1.27)  
hexyl isovalerate (0.46)  
1-octen-3-ol (0.25)  
limonene (0.52)  
lavandulyl acetate (4.34)  
myrcene (0.69)  
borneol (1.44)  
3-octanone (0.93)  
geraniol (0.39)  
caryophyllene (2.73)  
(*E*)- $\beta$ -farnesene (1.88)  
 $\beta$ -ocimene (2.35)

---

Garlic

eucalyptol (40.78)  
linalool (3.74)  
 $\alpha$ -pinene (17.39)  
methyleugenol (1.98)  
isobutyl isobutyrate (0.28)  
*o*-cymene (5.26)  
4-carvomenthenol (0.63)  
2-(4-methylphenyl)propan-2-ol (0.73)  
 $\beta$ -pinene (0.25)  
*p*-menth-1-en-8-ol (3.85)  
limonene (7.15)  
linalyl anthranilate (1.23)  
3-carene (0.24)  
myrcene (0.22)  
isopinocarveol (0.23)  
isobutyl 2-methylbutyrate (0.54)  
 $\alpha$ -terpineol acetate (1.91)  
*trans-p*-menth-2-ene-1,4-diol (0.32)  
geraniol (0.67)  
neryl acetate (9.71)  
caryophyllene (2.18)  
humulene (0.47)  
 $\gamma$ -elemene (0.24)

---

eucalyptol (0.30)  
diallyl sulfide (3.76)  
diallyl trisulfide (2.15)  
diallyl disulphide (57.65)  
dimethyl trisulfide (0.55)  
limonene (0.53)

|            |                                                    |
|------------|----------------------------------------------------|
| Cardamom   | allyl methyl trisulfide (26.06)                    |
|            | allyl methyl disulfide (2.71)                      |
|            | 1,2-dithiolane (0.54)                              |
|            | 3-vinyl-1,2-dithiacyclohex-4-ene (2.65)            |
|            | 1,1-dioxide 1,2-dithiolane (2.77)                  |
|            | <i>trans</i> -3,5-diethyl-1,2,4-trithiolane (0.34) |
|            | eucalyptol (34.68)                                 |
|            | linalool (5.01)                                    |
|            | $\alpha$ -pinene (1.28)                            |
|            | <i>cis</i> - $\beta$ -terpineol (0.67)             |
|            | <i>o</i> -cymene (0.36)                            |
|            | $\beta$ -pinene (0.27)                             |
|            | <i>p</i> -menth-1-en-8-ol (1.87)                   |
|            | sabinene (0.35)                                    |
|            | limonene (2.02)                                    |
|            | linalyl anthranilate (8.18)                        |
|            | myrcene (1.07)                                     |
| Mandarin   | $\alpha$ -terpinyl acetate (41.79)                 |
|            | geraniol (1.13)                                    |
|            | nerolidol (1.33)                                   |
|            | $\alpha$ -pinene (2.36)                            |
|            | $\gamma$ -terpinene (19.03)                        |
|            | <i>o</i> -cymene (7.61)                            |
|            | terpinolene (0.90)                                 |
|            | $\beta$ -pinene (1.33)                             |
|            | $\beta$ -terpineol (0.27)                          |
|            | sabinene (0.22)                                    |
| Hyssop     | limonene (66.71)                                   |
|            | myrcene (1.56)                                     |
|            | eucalyptol (0.57)                                  |
|            | linalool (18.04)                                   |
|            | $\alpha$ -pinene (8.61)                            |
|            | estragole (0.24)                                   |
|            | myrtenol (0.96)                                    |
|            | <i>o</i> -cymene (0.53)                            |
|            | pinocamphone (52.97)                               |
|            | 4-carvomenthenol (0.93)                            |
|            | $\beta$ -pinene (6.37)                             |
|            | <i>p</i> -menth-1-en-8-ol (0.85)                   |
|            | sabinene (0.58)                                    |
|            | limonene (1.39)                                    |
|            | myrcene (0.26)                                     |
|            | myrtenal (0.46)                                    |
|            | 2,3-pinandediol (0.62)                             |
|            | borneol (1.08)                                     |
|            | elemol (1.13)                                      |
|            | spathulenol (1.11)                                 |
|            | isopinocarveol (0.34)                              |
|            | caryophyllene oxide (0.57)                         |
| Grapefruit | caryophyllene (1.32)                               |
|            | $\alpha$ -pinene (0.42)                            |
|            | carveol (5.20)                                     |
|            | <i>o</i> -cymene (0.28)                            |

|               |                                                                                                                                                                                                                                                                                                                                                                                                                                                                                                                                                                              |
|---------------|------------------------------------------------------------------------------------------------------------------------------------------------------------------------------------------------------------------------------------------------------------------------------------------------------------------------------------------------------------------------------------------------------------------------------------------------------------------------------------------------------------------------------------------------------------------------------|
| Lemongrass    | D-carvone (4.73)<br>limonene (78.20)<br>myrcene (0.26)<br>limonene-1,2-diol (0.74)<br><i>cis-p</i> -mentha-2,8-dien-1-ol (1.88)<br><i>trans</i> -limonene oxide (5.85)<br>caryophyllene oxide (0.35)<br><i>trans-p</i> -mentha-2,8-dienol (2.09)                                                                                                                                                                                                                                                                                                                             |
|               | eugenol (0.85)<br>linalool (0.36)<br>citronellal (38.81)<br>citronellol (18.96)<br>citronellyl acetate (2.89)<br>isopulegol (0.68)<br>myrcene (3.02)<br>elemol (2.54)<br>cedrelanol (0.59)<br>$\delta$ -cadinene (0.90)<br>geraniol (24.82)<br>$\alpha$ -citral (3.21)<br>caryophyllene (0.22)<br>germacrene D (0.67)<br>germacrene-D-4-ol (0.29)<br>$\gamma$ -cadinene (0.32)<br>$\delta$ -elemene (0.86)                                                                                                                                                                   |
| Siberian pine | <i>p</i> -cymen-7-ol (0.24)<br>camphor (0.41)<br>bornyl acetate (55.01)<br>camphene (18.10)<br>$\alpha$ -pinene (8.37)<br><i>o</i> -cymene (0.45)<br>santene (0.97)<br>$\beta$ -phellandrene (1.13)<br>2-(4-methylphenyl)propan-2-ol (0.67)<br>$\beta$ -pinene (1.61)<br><i>p</i> -menth-1-en-8-ol (0.44)<br>limonene (3.89)<br>borneol (2.73)<br>tricyclene (1.46)<br>4-isopropyl-2-cyclohexenone (0.58)<br>$\alpha$ -bisabolol (0.41)<br>caryophyllene oxide (1.25)<br>caryophyllene (0.87)<br>humulene (0.53)<br>$\beta$ -bisabolene (0.25)<br>humulene epoxide II (0.62) |
| Camphor       | palmitic acid (1.59)<br>eucalyptol (56.98)<br>camphene (0.39)<br>$\alpha$ -pinene (0.38)<br>estragole (0.32)<br><i>m</i> -cymene (13.40)<br>$\beta$ -pinene (3.06)                                                                                                                                                                                                                                                                                                                                                                                                           |

|                                                |                                             |
|------------------------------------------------|---------------------------------------------|
| Cade                                           | sabinene (0.56)                             |
|                                                | limonene (22.81)                            |
|                                                | <i>trans-p</i> -menth-2-ene-1,4-diol (0.52) |
|                                                | 2-methyl-phenol (1.25)                      |
|                                                | <i>m</i> -cresol (1.40)                     |
|                                                | 2-methoxy-phenol (4.21)                     |
|                                                | phenol (1.05)                               |
|                                                | creosol (9.32)                              |
|                                                | 2-methoxy-4-propylphenol (3.02)             |
|                                                | 3-methyl-1,2-cyclopentanedione (1.17)       |
|                                                | 4-ethyl-2-methoxyphenol (7.26)              |
|                                                | cedrol (0.50)                               |
|                                                | $\alpha$ -curcumene (1.08)                  |
|                                                | cedrelanol (0.45)                           |
|                                                | $\delta$ -cadinene (18.65)                  |
|                                                | cubenol (2.66)                              |
|                                                | isolekene (3.70)                            |
|                                                | 8,14-cedranoxide (0.30)                     |
|                                                | 4,5,9,10-dehydro-isolongifolene (2.36)      |
|                                                | isoeugenol (1.90)                           |
|                                                | caryophyllene (1.04)                        |
|                                                | humulene (1.58)                             |
|                                                | <i>trans</i> -calamenene (17.44)            |
| Cedar leaves                                   | cedrene (8.83)                              |
|                                                | camphor (3.75)                              |
|                                                | eucalyptol (0.27)                           |
|                                                | bornyl acetate (0.65)                       |
|                                                | camphene (0.32)                             |
|                                                | $\alpha$ -pinene (0.40)                     |
|                                                | chrysanthone (90.30)                        |
|                                                | 4-carvomenthenol (0.71)                     |
|                                                | fenchone (2.70)                             |
|                                                | sabinene (0.31)                             |
|                                                | limonene (0.27)                             |
|                                                | myrcene (0.31)                              |
| Ginger<br><i>Zingiber officinale</i><br>Roscoe | eucalyptol (6.99)                           |
|                                                | linalool (0.31)                             |
|                                                | camphene (5.73)                             |
|                                                | $\alpha$ -pinene (1.70)                     |
|                                                | 6-methyl-5-hepten-2-one (0.61)              |
|                                                | <i>p</i> -menth-1-en-8-ol (0.74)            |
|                                                | copaene (0.59)                              |
|                                                | limonene (1.15)                             |
|                                                | myrcene (0.63)                              |
|                                                | borneol (1.09)                              |
|                                                | $\beta$ -bergamotene (0.37)                 |
|                                                | $\beta$ -eudesmol (0.27)                    |
|                                                | elemol (0.53)                               |
|                                                | $\alpha$ -curcumene (31.56)                 |
|                                                | zingiberene (29.85)                         |
|                                                | geraniol (0.43)                             |
|                                                | $\alpha$ -farnesene (4.33)                  |
|                                                | nerolidol (0.61)                            |

|                        |                                         |
|------------------------|-----------------------------------------|
| Cumin                  | $\gamma$ -cadinene (0.68)               |
|                        | $\beta$ -elemene (1.24)                 |
|                        | $\beta$ -bisabolene (10.61)             |
|                        | <i>p</i> -cymen-7-ol (0.50)             |
|                        | 4-isopropylbenzaldehyde (37.92)         |
|                        | $\alpha$ -pinene (0.35)                 |
|                        | $\alpha$ -phellandrene (1.02)           |
|                        | $\alpha$ -terpinene (13.86)             |
|                        | <i>p</i> -cymene (7.56)                 |
|                        | carvacrol (0.29)                        |
|                        | $\beta$ -phellandrene (0.30)            |
|                        | 2-(4-methylphenyl)propan-2-ol (0.21)    |
|                        | $\beta$ -pinene (5.56)                  |
|                        | sabinene (0.20)                         |
|                        | limonene (0.32)                         |
|                        | myrcene (0.37)                          |
|                        | carotol (1.34)                          |
|                        | caryophyllene oxide (0.51)              |
|                        | caryophyllene (0.70)                    |
|                        | ( <i>E</i> )- $\beta$ -farnesene (0.90) |
| Patchouli              | 2-carene-10-ol (28.10)                  |
|                        | $\beta$ -guaiene (19.04)                |
|                        | ledol (1.06)                            |
|                        | $\beta$ -patchoulene (2.05)             |
|                        | seychellene (6.84)                      |
|                        | $\alpha$ -patchoulene (5.87)            |
|                        | ledene oxide-(I) (0.45)                 |
|                        | $\alpha$ -panasinsene (0.29)            |
|                        | caryophyllene oxide (0.57)              |
|                        | caryophyllene (3.19)                    |
| Orange bitter          | $\alpha$ -guaiene (15.27)               |
|                        | patchouli alcohol (45.36)               |
|                        | linalool (0.39)                         |
|                        | $\alpha$ -pinene (0.47)                 |
|                        | $\gamma$ -terpinene (0.11)              |
|                        | decanal (0.32)                          |
|                        | linalyl acetate (0.61)                  |
|                        | $\beta$ -pinene (2.70)                  |
| Eucalyptus             | sabinene (0.25)                         |
|                        | limonene (95.15)                        |
|                        | eucalyptol (83.86)                      |
|                        | $\alpha$ -pinene (1.11)                 |
|                        | <i>p</i> -cymene (8.11)                 |
|                        | $\beta$ -pinene (0.19)                  |
|                        | D-carvone (0.33)                        |
|                        | limonene (6.12)                         |
| Pine silvestre natural | myrcene (0.28)                          |
|                        | bornyl acetate (1.37)                   |
|                        | camphene (0.86)                         |
|                        | $\alpha$ -pinene (22.82)                |
|                        | myrtenol (0.22)                         |
|                        | <i>o</i> -cymene (0.49)                 |
|                        | terpinolene (2.01)                      |

|          |                                      |
|----------|--------------------------------------|
| Bergamot | 2-(4-methylphenyl)propan-2-ol (1.61) |
|          | β-pinene (17.11)                     |
|          | β-terpineol (0.89)                   |
|          | limonene (11.22)                     |
|          | 3-carene (16.56)                     |
|          | isopinocarveol (0.35)                |
|          | (+)- <i>cis</i> -verbenol (0.25)     |
|          | longifolene (1.98)                   |
|          | α-cubebene (0.49)                    |
|          | caryophyllene oxide (3.54)           |
|          | caryophyllene (16.74)                |
|          | humulene (1.22)                      |
|          | humulene epoxide II (0.28)           |
|          | linalool (13.83)                     |
|          | α-pinene (0.74)                      |
|          | carveol (0.25)                       |
|          | <i>o</i> -cymene (6.47)              |
|          | β-pinene (4.57)                      |
|          | D-carvone (0.36)                     |
|          | sabinene (0.54)                      |
| Juniper  | limonene (26.11)                     |
|          | linalyl anthranilate (45.28)         |
|          | myrcene (0.67)                       |
|          | <i>trans</i> -limonene oxide (0.26)  |
|          | neryl acetate (0.68)                 |
|          | β-bisabolene (0.23)                  |
|          | α-pinene (27.08)                     |
|          | γ-terpinene (0.97)                   |
|          | <i>o</i> -cymene (3.00)              |
|          | 4-carvomenthenol (6.29)              |
|          | terpinolene (0.91)                   |
|          | 2-(4-methylphenyl)propan-2-ol (0.60) |
|          | β-pinene (3.64)                      |
|          | <i>p</i> -menth-1-en-8-ol (0.64)     |
|          | sabinene (5.95)                      |
|          | copaene (1.03)                       |
|          | limonene (7.52)                      |
|          | myrcene (9.27)                       |
|          | spathulenol (0.81)                   |
| Birch    | cedrelanol (0.36)                    |
|          | β-cadinene (0.35)                    |
|          | α-cubebene (0.90)                    |
|          | caryophyllene oxide (2.91)           |
|          | caryophyllene (13.69)                |
|          | ( <i>E</i> )-β-farnesene (0.60)      |
|          | humulene (3.58)                      |
|          | <i>trans</i> -calamenene (0.93)      |
|          | γ-elemene (1.96)                     |
|          | γ-cadinene (1.53)                    |
|          | β-elemene (3.60)                     |
|          | 4-epi-cubebol (1.12)                 |
|          | α-murolene (0.78)                    |
|          | 2-methyl-phenol (1.15)               |

|             |                                                                                                                                                                                                                                                                                                                                                                                                                                                                                                                                                                                                            |
|-------------|------------------------------------------------------------------------------------------------------------------------------------------------------------------------------------------------------------------------------------------------------------------------------------------------------------------------------------------------------------------------------------------------------------------------------------------------------------------------------------------------------------------------------------------------------------------------------------------------------------|
|             | <i>m</i> -cresol (1.29)<br>2-methoxy-phenol (6.64)<br>2-methoxy-4-methylphenol (7.20)<br>cadalene (5.54)<br>(-)- $\beta$ -cadinene (0.74)<br>1,8-dimethylnaphthalene (4.56)<br>2-methoxy-4-propylphenol (2.73)<br>3-methyl-1,2-cyclopentanedione (0.81)<br>benzocycloheptatriene (0.87)<br>cedrelanol (1.44)<br>$\delta$ -cadinene (18.45)<br>dihydrocurcumene (3.39)<br>4,5,9,10-dehydro-isolongifolene, (1.69)<br>isoeugenol (1.59)<br>cadina-1,4-diene (2.69)<br><i>trans</i> -calamenene (18.12)<br>cedrene (8.18)<br>3,4-dihydrocadalene (5.76)<br>4-epi-cubebol (2.77)<br>$\alpha$ -muurolene (4.38) |
| Fennel      | camphor (0.22)<br>$\alpha$ -pinene (0.97)<br>estragole (2.20)<br><i>o</i> -cymene (0.40)<br>fenchone (3.37)<br>limonene (3.40)<br>4-methoxyphenylacetone (4.73)<br>4-methoxybenzaldehyde (6.34)<br>myrcene (0.20)<br><i>trans</i> - $\alpha$ -bergamotene (0.11)<br>anethole (78.05)                                                                                                                                                                                                                                                                                                                       |
| Cedar fruit | linalool (6.36)<br>$\alpha$ -pinene (0.44)<br>carveol (0.39)<br><i>o</i> -cymene (17.39)<br>$\beta$ -pinene (3.22)<br>D-carvone (1.37)<br>sabinene (0.21)<br>limonene (32.20)<br>linalyl anthranilate (25.03)<br>myrcene (0.40)<br><i>trans</i> - $\alpha$ -bergamotene (0.33)<br><i>cis-p</i> -mentha-2,8-dien-1-ol (0.44)<br><i>trans</i> -limonene oxide (1.15)<br>$\alpha$ -citral (6.98)<br>neryl acetate (1.59)<br>caryophyllene oxide (0.44)<br>geranic acid (0.95)<br>caryophyllene (0.22)<br>$\beta$ -bisabolene (0.46)<br><i>trans-p</i> -mentha-2,8-dienol (0.43)                               |
| Lemon       | $\alpha$ -pinene (1.11)<br>carveol (0.33)                                                                                                                                                                                                                                                                                                                                                                                                                                                                                                                                                                  |

Roman chamomile

---

$\gamma$ -terpinene (1.11)  
 $o$ -cymene (7.89)  
 $\beta$ -pinene (7.21)  
sabinene (1.02)  
limonene (59.22)  
myrcene (0.70)  
myrtenal (0.21)  
limonene-1,2-diol (2.85)  
*cis-p*-mentha-2,8-dien-1-ol (0.36)  
*trans*-limonene oxide (0.73)  
geraniol (2.24)  
 $\alpha$ -citral (11.11)  
neryl acetate (1.87)  
caryophyllene oxide (0.44)  
geranic acid (1.58)

---

eucalyptol (2.50)  
bornyl acetate (1.00)  
camphene (0.40)  
 $\alpha$ -pinene (18.90)  
 $o$ -cymene (0.20)  
pinocamphone (0.30)  
4-carvomenthenol (0.30)  
terpinolene (0.20)  
sabinene (0.40)  
limonene (7.30)  
myrcene (1.70)  
borneol (0.80)  
spathulenol (1.30)  
bornyl butyrate (1.70)  
artemisia alcohol (1.70)  
isopinocarveol (4.80)  
pinocarvone (0.30)  
caryophyllene oxide (0.70)  
yomogi alcohol (1.30)  
germacrene D (1.80)  
*trans*-2,7-dimethyl-4,6-octadien-2-ol (49.30)

Savory

---

sativene (0.70)  
 $\delta$ -elemene (1.50)

---

eucalyptol (0.41)  
linalool (1.48)  
 $\alpha$ -pinene (0.28)  
thymol (1.55)  
 $\gamma$ -terpinene (2.30)  
 $\alpha$ -terpinene (0.54)  

*p*-cymene (5.63)  
carvacrol (71.47)  
4-carvomenthenol (1.06)  
*p*-menth-1-en-8-ol (0.25)  
1-octen-3-ol (0.93)  
limonene (0.24)  
myrcene (0.32)  
borneol (0.95)  
carvacrol acetate (0.34)

|                            |                                           |
|----------------------------|-------------------------------------------|
| Rosemary                   | spathulenol (0.35)                        |
|                            | $\beta$ -cadinene (0.78)                  |
|                            | caryophyllene oxide (0.98)                |
|                            | caryophyllene (5.02)                      |
|                            | $\gamma$ -cadinene (1.03)                 |
|                            | $\beta$ -bisabolene (4.08)                |
|                            | camphor (21.44)                           |
|                            | eucalyptol (53.20)                        |
|                            | eugenol (0.68)                            |
|                            | bornyl acetate (0.43)                     |
|                            | camphene (0.85)                           |
|                            | $\alpha$ -pinene (6.66)                   |
|                            | <i>o</i> -cymene (0.43)                   |
|                            | 4-carvomenthenol (0.35)                   |
|                            | $\beta$ -pinene (5.28)                    |
|                            | <i>p</i> -menth-1-en-8-ol (1.19)          |
|                            | limonene (1.66)                           |
|                            | myrcene (0.35)                            |
|                            | borneol (1.27)                            |
| <i>Eucalyptus globulus</i> | caryophyllene (6.21)                      |
|                            | eucalyptol (85.89)                        |
|                            | $\alpha$ -pinene (0.62)                   |
|                            | carveol (0.19)                            |
|                            | <i>o</i> -cymene (8.34)                   |
|                            | D-carvone (0.47)                          |
| Orange sweet               | limonene (4.50)                           |
|                            | linalool (0.82)                           |
|                            | $\alpha$ -pinene (0.37)                   |
|                            | carveol (0.51)                            |
|                            | D-carvone (0.76)                          |
|                            | sabinene (0.24)                           |
|                            | limonene (94.98)                          |
|                            | myrcene (1.73)                            |
|                            | <i>cis-p</i> -mentha-2,8-dien-1-ol (0.27) |
|                            | <i>trans-p</i> -mentha-2,8-dienol (0.33)  |
| Niaouly                    | eucalyptol (65.95)                        |
|                            | linalool (0.20)                           |
|                            | $\alpha$ -pinene (5.34)                   |
|                            | $\gamma$ -terpinene (0.76)                |
|                            | <i>o</i> -cymene (1.46)                   |
|                            | 4-carvomenthenol(0.88)                    |
|                            | terpinolene (0.44)                        |
|                            | $\beta$ -pinene (1.48)                    |
|                            | <i>p</i> -menth-1-en-8-ol(8.32)           |
|                            | limonene (5.87)                           |
|                            | myrcene (0.71)                            |
|                            | ledol (5.45)                              |
|                            | $\beta$ -terpineol acetate (1.37)         |
|                            | caryophyllene (1.76)                      |
| Artemisia                  | 4-isopropylbenzaldehyde (0.41)            |
|                            | camphor (26.98)                           |
|                            | eucalyptol (2.04)                         |
|                            | camphene (2.98)                           |

|              |                                             |
|--------------|---------------------------------------------|
| Cajeput      | $\alpha$ -pinene (0.20)                     |
|              | $\gamma$ -terpinene (0.25)                  |
|              | myrtenol (0.28)                             |
|              | <i>o</i> -cymene (1.24)                     |
|              | chrysanthone (54.59)                        |
|              | 4-carvomenthenol (2.52)                     |
|              | sabinene (0.91)                             |
|              | borneol (0.87)                              |
|              | artemisia alcohol (1.97)                    |
|              | isopinocarveol (0.68)                       |
|              | santolina triene (2.16)                     |
|              | yomogi alcohol (1.61)                       |
|              | germacrene D (0.33)                         |
|              | eucalyptol (52.66)                          |
|              | linalool (2.24)                             |
|              | $\alpha$ -pinene (1.47)                     |
| Black pepper | $\gamma$ -terpinene (0.88)                  |
|              | <i>p</i> -cymene (18.41)                    |
|              | <i>cis</i> - $\beta$ -terpineol (0.68)      |
|              | terpinolene (0.47)                          |
|              | <i>p</i> -menth-3-en-1-ol (0.26)            |
|              | $\beta$ -pinene (0.81)                      |
|              | <i>p</i> -menth-1-en-8-ol (7.61)            |
|              | limonene (3.55)                             |
|              | myrcene (0.65)                              |
|              | $\alpha$ -terpinyl acetate (1.19)           |
|              | caryophyllene (9.13)                        |
|              | linalool (0.58)                             |
|              | $\alpha$ -pinene (6.92)                     |
|              | <i>p</i> -cymene (1.08)                     |
|              | 4-carvomenthenol (0.36)                     |
|              | $\beta$ -pinene (6.26)                      |
|              | sabinene (7.21)                             |
|              | copaene (5.39)                              |
|              | limonene (11.08)                            |
|              | 3-carene (5.86)                             |
|              | <i>trans</i> - $\alpha$ -bergamotene (0.10) |
|              | spathulenol (0.38)                          |
|              | $\beta$ -cubebene (0.70)                    |
|              | $\delta$ -cadinene (0.94)                   |
|              | $\beta$ -selinene (0.50)                    |
|              | caryophyllene oxide (9.71)                  |
| White thyme  | caryophyllene (33.58)                       |
|              | humulene (2.42)                             |
|              | <i>trans</i> -calamenene (0.32)             |
|              | $\gamma$ -cadinene (0.24)                   |
|              | $\beta$ -elemene (0.75)                     |
|              | $\beta$ -bisabolene (1.97)                  |
|              | humulene epoxide II (0.54)                  |
|              | $\alpha$ -muurolene (0.41)                  |
|              | camphor (2.38)                              |
|              | eucalyptol (1.21)                           |
|              | linalool (7.51)                             |

|          |                                             |
|----------|---------------------------------------------|
| Marjoram | camphene (1.02)                             |
|          | $\alpha$ -pinene (1.32)                     |
|          | thymol (44.43)                              |
|          | $\gamma$ -terpinene (5.19)                  |
|          | $\alpha$ -terpinene (0.64)                  |
|          | <i>p</i> -cymene (18.20)                    |
|          | <i>cis</i> - $\beta$ -terpineol (0.20)      |
|          | carvacrol (6.62)                            |
|          | 4-carvomenthenol (3.04)                     |
|          | thymol methyl ether (0.36)                  |
|          | $\beta$ -pinene (0.35)                      |
|          | <i>p</i> -menth-1-en-8-ol (0.22)            |
|          | 1-octen-3-ol (0.52)                         |
|          | limonene (0.46)                             |
|          | myrcene (1.12)                              |
|          | borneol (2.18)                              |
|          | caryophyllene oxide (0.67)                  |
|          | caryophyllene (2.37)                        |
|          | eucalyptol (1.02)                           |
|          | linalool (40.67)                            |
| Clove    | $\alpha$ -pinene (0.44)                     |
|          | <i>cis</i> - $\beta$ -terpineol (15.42)     |
|          | <i>o</i> -cymene (8.48)                     |
|          | 4-carvomenthenol (23.19)                    |
|          | 2-(4-methylphenyl)propan-2-ol (0.60)        |
|          | <i>p</i> -menth-1-en-8-ol (0.44)            |
|          | sabinene (2.62)                             |
|          | linalol oxide (0.53)                        |
|          | limonene (0.75)                             |
|          | myrcene (0.46)                              |
|          | <i>trans-p</i> -menth-2-ene-1,4-diol (0.78) |
|          | caryophyllene oxide (1.00)                  |
| Cypress  | caryophyllene (0.65)                        |
|          | sabinene hydrate (2.95)                     |
|          | eugenol (80.09)                             |
|          | methylsalicylate (0.22)                     |
|          | eugenol acetate (9.91)                      |
|          | caryophyllene (8.75)                        |
|          | humulene (1.03)                             |
|          | eucalyptol (0.55)                           |
|          | linalool (0.73)                             |
|          | camphene (0.64)                             |
|          | $\alpha$ -pinene (47.69)                    |
|          | <i>o</i> -cymene (1.44)                     |
|          | 4-carvomenthenol (1.52)                     |
|          | terpinolene (0.69)                          |
|          | 2-(4-methylphenyl)propan-2-ol (1.21)        |
|          | $\beta$ -pinene (1.25)                      |
|          | <i>p</i> -menth-1-en-8-ol (0.38)            |
|          | sabinene (0.68)                             |
|          | limonene (3.95)                             |
|          | 3-carene (29.33)                            |
|          | verbenone (0.290)                           |

|                |                                    |
|----------------|------------------------------------|
| Nutmeg Natural | cedrol (4.73)                      |
|                | $\alpha$ -terpinyl acetate (3.82)  |
|                | (+)- <i>cis</i> -verbenol (0.27)   |
|                | <i>trans</i> -2-carene-4-ol (0.37) |
|                | cedrene (0.48)                     |
|                | eucalyptol (2.91)                  |
|                | eugenol (2.24)                     |
|                | myristicin (21.86)                 |
|                | linalool (0.54)                    |
|                | $\alpha$ -pinene (12.01)           |
|                | methyleugenol (0.32)               |
|                | $\alpha$ -phellandrene (0.77)      |
|                | $\gamma$ -terpinene (3.83)         |
|                | $\alpha$ -terpinene (0.64)         |
|                | <i>o</i> -cymene (1.64)            |
|                | 4-carvomenthenol (16.55)           |
|                | terpinolene (0.68)                 |
|                | $\beta$ -pinene (11.07)            |
|                | <i>p</i> -menth-1-en-8-ol (0.73)   |
|                | sabinene (13.87)                   |
|                | copaene (0.26)                     |
|                | limonene (7.80)                    |
|                | $\alpha$ -terpinyl acetate (0.15)  |
|                | isosafrole (1.55)                  |
|                | isoeugenol (0.33)                  |
|                | neryl acetate (0.22)               |
| Peppermint     | menthol (57.84)                    |
|                | eucalyptol (0.94)                  |
|                | isomenthone (33.17)                |
|                | $\alpha$ -terpinyl acetate (0.30)  |
|                | limonene (0.52)                    |
|                | isopulegol (0.88)                  |
|                | menthyl acetate (5.00)             |
|                | piperitenone (0.75)                |
|                | (+)-pulegone (0.36)                |
|                | caryophyllene (0.24)               |
| Verbena        | eucalyptol (0.62)                  |
|                | linalool (1.33)                    |
|                | $\alpha$ -pinene (1.58)            |
|                | citronellyl formate (1.15)         |
|                | citronellal (8.03)                 |
|                | 6-methyl-5-hepten-2-one (1.33)     |
|                | 4-carvomenthenol (0.24)            |
|                | $\beta$ -pinene (2.08)             |
|                | sabinene (0.47)                    |
|                | copaene (0.11)                     |
|                | limonene (9.51)                    |
|                | myrcene (0.36)                     |
|                | elemol (0.51)                      |
|                | (+)- <i>cis</i> -verbenol (0.35)   |
|                | $\delta$ -cadinene (0.21)          |
|                | geraniol (6.19)                    |
|                | $\alpha$ -citral (64.53)           |

|                    |                                             |
|--------------------|---------------------------------------------|
| Basil              | geranic acid (0.73)                         |
|                    | caryophyllene (0.69)                        |
|                    | menthol (0.44)                              |
|                    | linalool (19.72)                            |
|                    | estragole (75.17)                           |
|                    | <i>trans</i> - $\alpha$ -bergamotene (0.86) |
|                    | $\alpha$ -citral (0.68)                     |
|                    | caryophyllene oxide (0.33)                  |
|                    | caryophyllene (0.35)                        |
|                    | ( <i>E</i> )- $\beta$ -farnesene (0.31)     |
| Palmarosa          | <i>cis</i> - $\alpha$ -bisabolene (2.15)    |
|                    | linalool (4.07)                             |
|                    | D-carvone (0.58)                            |
|                    | farnesol (0.74)                             |
|                    | geraniol (76.48)                            |
|                    | $\alpha$ -citral (0.67)                     |
|                    | neryl acetate (13.96)                       |
|                    | caryophyllene (1.80)                        |
|                    | humulene (0.24)                             |
|                    | $\beta$ -ocimene (1.45)                     |
| Laurel             | eucalyptol (53.91)                          |
|                    | eugenol (1.86)                              |
|                    | linalool (3.02)                             |
|                    | $\alpha$ -pinene (3.18)                     |
|                    | methyleugenol (4.17)                        |
|                    | $\gamma$ -terpinene (1.85)                  |
|                    | myrtenol (0.29)                             |
|                    | <i>o</i> -cymene (2.39)                     |
|                    | 4-carvomenthenol (3.02)                     |
|                    | $\beta$ -pinene (2.30)                      |
|                    | sabinene (3.20)                             |
|                    | limonene (1.99)                             |
|                    | $\alpha$ -terpinyl acetate (18.83)          |
| Natural anise pure | linalool (0.92)                             |
|                    | $\alpha$ -pinene (0.28)                     |
|                    | estragole (3.77)                            |
|                    | 4-carvomenthenol (0.25)                     |
|                    | <i>p</i> -menth-1-en-8-ol (0.22)            |
|                    | limonene (1.65)                             |
|                    | 4-methoxyphenylacetone (0.92)               |
|                    | 4-methoxybenzaldehyde (2.13)                |
|                    | <i>trans</i> - $\alpha$ -bergamotene (0.46) |
|                    | anethole (88.51)                            |
|                    | isohomogenol (0.24)                         |
|                    | caryophyllene (0.37)                        |
|                    | nerolidol (0.28)                            |
| Incense            | acetic acid (0.70)                          |
|                    | bornyl acetate (0.97)                       |
|                    | $\alpha$ -pinene (26.98)                    |
|                    | $\alpha$ -phellandrene (1.95)               |
|                    | <i>o</i> -cymene (3.72)                     |
|                    | $\beta$ -phellandrene (0.95)                |
|                    | 4-carvomenthenol(0.64)                      |

|                                           |                                                                                                                                                                                                                                                                                                                                                                                                                                                                                                                                                                                                                                                                                                             |
|-------------------------------------------|-------------------------------------------------------------------------------------------------------------------------------------------------------------------------------------------------------------------------------------------------------------------------------------------------------------------------------------------------------------------------------------------------------------------------------------------------------------------------------------------------------------------------------------------------------------------------------------------------------------------------------------------------------------------------------------------------------------|
|                                           | 2-(4-methylphenyl)propan-2-ol (0.22)<br>$\beta$ -pinene (1.01)<br><i>p</i> -menth-1-en-8-ol (0.53)<br>sabinene (2.82)<br>copaene (2.34)<br>limonene (20.32)<br>3-carene (0.54)<br>myrcene (2.99)<br>myrtenyl acetate (0.34)<br>$\beta$ -eudesmol (0.34)<br>ledol (0.53)<br>isopinocarveol (0.93)<br>cedrelanol (2.35)<br>(+)- <i>cis</i> -verbenol (1.78)<br>$\delta$ -cadinene (2.12)<br>$\alpha$ -cubebene (0.37)<br>$\delta$ -selinene (1.62)<br>caryophyllene oxide (2.97)<br>caryophyllene (9.11)<br>humulene (1.96)<br>$\gamma$ -eudesmol (0.52)<br>$\beta$ -elemene (4.02)<br>humulene epoxide II (1.11)<br>$\alpha$ -selinene (1.09)<br>4- <i>epi</i> -cubebol (1.74)<br>$\alpha$ -muurolene (0.39) |
| <i>Mentha suaveolens</i><br>(Sicily)      | $\alpha$ -pinene (1.04)<br>thymol (1.21)<br>$\gamma$ -terpinene (0.11)<br>4-carvomenthenol (0.67)<br>$\beta$ -pinene (3.83)<br>sabinene (0.57)<br>limonene (8.76)<br>2-(1-methylethylidene)-cyclohexanone (1.02)<br>myrtenal (0.31)<br>cedrelanol (0.35)<br>$\alpha$ -cubebene (0.52)<br>(+)-pulegone (59.77)<br>cubenol (0.22)<br><i>cis</i> -jasmone (0.61)<br>caryophyllene oxide (0.19)<br>caryophyllene (7.32)<br>humulene (1.06)<br>$\beta$ -ocimene (0.15)<br>germacrene D (5.17)<br>cinerolon (4.64)<br><i>trans</i> -calamenene (0.73)<br>$\gamma$ -cadinene (0.19)<br>$\alpha$ -muurolene (0.20)<br>$\alpha$ -gurjunene (0.43)<br><i>epi</i> -bicyclosesquiphellandrene (0.90)                    |
| <i>Coridothymus capitatus</i><br>(Sicily) | linalool (1.85)<br>thymol (0.49)                                                                                                                                                                                                                                                                                                                                                                                                                                                                                                                                                                                                                                                                            |

|                                 |                                                                                                                                                                                                                                                                                                                                                                                                                                                                                                                |
|---------------------------------|----------------------------------------------------------------------------------------------------------------------------------------------------------------------------------------------------------------------------------------------------------------------------------------------------------------------------------------------------------------------------------------------------------------------------------------------------------------------------------------------------------------|
|                                 | $\gamma$ -terpinene (6.03)<br>$\gamma$ -terpinene (1.46)<br><i>p</i> -cymene (7.14)<br><i>cis</i> - $\beta$ -terpineol (0.22)<br>carvacrol (61.00)<br>$\beta$ -phellandrene (0.33)<br>$\alpha$ -thujene (1.01)<br>1-octen-3-ol (0.73)<br>limonene (0.28)<br>myrcene (1.59)<br>borneol (0.60)<br>$\alpha$ -citral (0.22)<br>caryophyllene oxide (1.35)<br>caryophyllene (13.58)<br>humulene (0.63)<br>$\beta$ -bisabolene (1.60)                                                                                |
| <i>Thymus vulgaris</i> (Sicily) | eucalyptol (0.86)<br>linalool (3.70)<br>camphene (0.55)<br>$\alpha$ -pinene (0.94)<br>thymol (34.05)<br>$\gamma$ -terpinene (1.76)<br><i>p</i> -cymene (30.45)<br>carvacrol (0.66)<br>thymol methyl ether (10.70)<br><i>p</i> -menth-1-en-8-ol (0.32)<br>1-octen-3-ol (0.56)<br>limonene (0.45)<br>myrcene (0.98)<br>borneol (2.54)<br>isothymol methyl ether (5.97)<br>caryophyllene oxide (1.78)<br>caryophyllene (3.45)<br>$\gamma$ -cadinene (0.28)                                                        |
| <i>Origanum hirtum</i> (Sicily) | camphor (0.34)<br>eucalyptol (0.49)<br>thymol (34.70)<br>$\alpha$ -phellandrene (0.22)<br>$\gamma$ -terpinene (17.13)<br><i>p</i> -cymene (18.55)<br>carvacrol (0.84)<br>thymol methyl ether (4.87)<br>2-(4-methylphenyl)propan-2-ol (0.15)<br><i>p</i> -menth-1-en-8-ol (0.21)<br>$\alpha$ -thujene (1.12)<br>1-octen-3-ol (0.48)<br>limonene (0.40)<br>myrcene (1.34)<br>$\beta$ -bourbonene (0.35)<br>borneol (0.34)<br>thymol acetate (0.29)<br>isothymol methyl ether (7.42)<br>$\delta$ -cadinene (0.72) |

caryophyllene oxide (0.58)  
caryophyllene (2.86)  
humulene (0.34)  
 $\gamma$ -cadinene (1.00)  
 $\beta$ -bisabolene (5.04)  
 $\alpha$ -muurolene (0.24)

---

**Table S3.** Total antioxidant capacity of examined EOs.

| EOs                    | TAC <sup>a</sup>         |
|------------------------|--------------------------|
|                        | µg AAE/mg                |
| Chamomile morocco      | 0.023±0.007 <sup>1</sup> |
| Clary sage             | 0.062±0.013              |
| Sage oil               | 0.530±0.024              |
| Red thyme              | 0.030±0.011              |
| Tea tree               | 0.250±0.023              |
| Melissa                | 0.006±0.002              |
| Mountain pine          | 0.009±0.004              |
| Geranium Bourbon       | 0.008±0.002              |
| Oregano                | 0.007±0.005              |
| Ylang-ylang            | 0.009±0.007              |
| Coriander              | 0.006±0.003              |
| Lavander               | 0.006±0.002              |
| Myrtle                 | 0.005±0.002              |
| Garlic                 | 0.269±0.029              |
| Cardamom               | 0.314±0.046              |
| Mandarin               | 0.336±0.058              |
| Hyssop                 | 0.287±0.053              |
| Grapefruit             | 0.005±0.004              |
| Lemongrass             | 0.007±0.005              |
| Siberian pine          | 0.458±0.026              |
| Camphor                | 0.449±0.015              |
| Cade                   | 0.125±0.057              |
| Cedar leaves           | 0.146±0.097              |
| Ginger                 | 0.005±0.004              |
| Cumin                  | 0.004±0.002              |
| Patchouli              | 0.004±0.004              |
| Orange bitter          | 0.006±0.002              |
| Eucalyptus             | 0.003±0.003              |
| Pine silvestre natural | 0.004±0.002              |
| Bergamot               | 0.006±0.001              |
| Juniper                | 0.125±0.029              |
| Birch                  | 0.522±0.079              |
| Fennel                 | 0.008±0.002              |
| Cedar fruit            | 0.131±0.067              |
| Lemon                  | 0.009±0.004              |
| Roman chamomile        | 0.007±0.002              |
| Savory                 | 0.119±0.036              |
| Rosemary               | 0.098±0.057              |
| Ceylon cinnamon peel   | 0.006±0.004              |
| Eucalyptus globulus    | 0.007±0.003              |
| Orange sweet           | 0.033±0.029              |
| Niaouly                | 0.048±0.041              |
| Artemisia              | 0.007±0.005              |
| Cajeput                | 0.058±0.036              |
| Black pepper           | 1.231±0.536              |
| White thyme            | 0.063±0.036              |
| Marjoram               | 1.032±0.056              |
| Clove                  | 0.003±0.003              |
| Cypress                | 0.003±0.003              |

|                                         |             |
|-----------------------------------------|-------------|
| Nutmeg natural                          | 0.004±0.002 |
| Peppermint                              | 0.003±0.003 |
| Verbena                                 | 0.005±0.004 |
| Basil                                   | 0.006±0.002 |
| Palmarosa                               | 0.005±0.002 |
| Laurel                                  | 0.003±0.003 |
| Natural anise pure                      | 0.005±0.002 |
| Incense                                 | 0.004±0.002 |
| <i>Mentha suaveolens</i> (Sicily)       | 0.004±0.004 |
| <i>Coridotthymus capitatus</i> (Sicily) | 0.006±0.005 |
| <i>Thymus vulgaris</i> (Sicily)         | 0.007±0.002 |
| <i>Origanum hirtum</i> (Sicily)         | 0.002±0.002 |
| AA <sup>n</sup>                         | NA          |
| BHT <sup>o</sup>                        | NA          |
| EDTA <sup>p</sup>                       | NA          |
| Q <sup>q</sup>                          | NA          |

---

<sup>a</sup>Total antioxidant capacity

**Table S4.** DNA protective potential of selected 61 commercial essential oils on peroxyl radical-induced DNA damage

|                        |                 | Relative band density <sup>a</sup> |                         |                         |                         |                         |                         |                         |
|------------------------|-----------------|------------------------------------|-------------------------|-------------------------|-------------------------|-------------------------|-------------------------|-------------------------|
|                        | NC <sup>b</sup> | PC <sup>c</sup>                    | Quercetin <sup>d</sup>  | 25 µg/mL                | 50 µg/mL                | 100 µg/mL               | 200 µg/mL               | 400 µg/mL               |
| Chamomile morocco      | 1 <sup>†</sup>  | 0.066±0.12 <sup>†</sup>            | 0.909±0.82 <sup>†</sup> | 0.837±0.52 <sup>†</sup> | 0.84±1.4 <sup>†</sup>   | 0.877±0.58 <sup>†</sup> | 0.892±1.62 <sup>†</sup> | 0.92±1.57 <sup>†</sup>  |
| Clary sage             | 1 <sup>†</sup>  | 0.068±0.32 <sup>†</sup>            | 0.828±1.02 <sup>†</sup> | 0.935±0.92 <sup>†</sup> | 0.922±0.87 <sup>†</sup> | 0.901±0.45 <sup>†</sup> | 0.881±0.23 <sup>†</sup> | 0.859±1.06 <sup>†</sup> |
| Sage oil               | 1 <sup>†</sup>  | 0.049±0.43 <sup>†</sup>            | 0.971±0.32 <sup>†</sup> | 0.782±1.03 <sup>†</sup> | 0.779±0.78              | 0.818±0.54 <sup>†</sup> | 0.902±0.32 <sup>†</sup> | 0.938±1.03 <sup>†</sup> |
| Red thyme              | 1 <sup>†</sup>  | 0.128±1.23 <sup>†</sup>            | 0.934±0.8 <sup>†</sup>  | 0.945±0.58 <sup>†</sup> | 0.923±1.02 <sup>†</sup> | 0.916±0.34 <sup>†</sup> | 0.902±0.62 <sup>†</sup> | 0.849±1.4 <sup>†</sup>  |
| Tea tree               | 1 <sup>†</sup>  | 0.208±1.11 <sup>†</sup>            | 0.970±0.61 <sup>†</sup> | 0.927±0.41 <sup>†</sup> | 0.985±0.32 <sup>†</sup> | 0.981±0.43 <sup>†</sup> | 0.966±0.7 <sup>†</sup>  | 0.979±1.02 <sup>†</sup> |
| Melissa                | 1 <sup>†</sup>  | 0.106±1.5 <sup>†</sup>             | 0.841±0.53 <sup>†</sup> | 0.815±0.3 <sup>†</sup>  | 0.823±1.73 <sup>†</sup> | 0.837±0.58 <sup>†</sup> | 0.911±0.81 <sup>†</sup> | 0.959±0.67 <sup>†</sup> |
| Mountain pine          | 1 <sup>†</sup>  | 0.171±0.54 <sup>†</sup>            | 0.969±0.43 <sup>†</sup> | 0.924±1.03 <sup>†</sup> | 0.949±0.62 <sup>†</sup> | 0.964±0.73 <sup>†</sup> | 0.973±0.78 <sup>†</sup> | 0.987±1.6 <sup>†</sup>  |
| Geranium bourbon       | 1 <sup>†</sup>  | 0.171±0.5 <sup>†</sup>             | 0.947±0.92 <sup>†</sup> | 0.848±1.02 <sup>†</sup> | 0.905±1.11 <sup>†</sup> | 0.89±0.34 <sup>†</sup>  | 0.923±0.82 <sup>†</sup> | 0.949±0.52 <sup>†</sup> |
| Oregano                | 1 <sup>†</sup>  | 0.097±0.32 <sup>†</sup>            | 0.869±0.56 <sup>†</sup> | 0.807±1.23 <sup>†</sup> | 0.827±0.73 <sup>†</sup> | 0.839±0.45 <sup>†</sup> | 0.901±1.7 <sup>†</sup>  | 0.949±0.85 <sup>†</sup> |
| Ylang-ylang            | 1 <sup>†</sup>  | 0.108±1.2 <sup>†</sup>             | 0.917±0.78 <sup>†</sup> | 0.840±0.73 <sup>†</sup> | 0.831±0.45 <sup>†</sup> | 0.811±0.53 <sup>†</sup> | 0.809±1.86 <sup>†</sup> | 0.803±1.17 <sup>†</sup> |
| Coriander              | 1 <sup>†</sup>  | 0.108±0.6 <sup>†</sup>             | 0.874±1.05 <sup>†</sup> | 0.936±0.45 <sup>†</sup> | 0.897±0.34 <sup>†</sup> | 0.899±0.2 <sup>†</sup>  | 0.861±0.49 <sup>†</sup> | 0.831±1.2 <sup>†</sup>  |
| Lavander               | 1 <sup>†</sup>  | 0.171±1.04 <sup>†</sup>            | 0.886±0.54 <sup>†</sup> | 0.959±0.82 <sup>†</sup> | 0.976±0.94 <sup>†</sup> | 0.988±0.61 <sup>†</sup> | 0.997±0.35 <sup>†</sup> | 0.993±0.65 <sup>†</sup> |
| Myrtle                 | 1 <sup>†</sup>  | 0.16±0.54 <sup>†</sup>             | 0.938±0.76 <sup>†</sup> | 0.887±1.04 <sup>†</sup> | 0.903±0.63 <sup>†</sup> | 0.941±1.06 <sup>†</sup> | 0.968±0.22 <sup>†</sup> | 0.996±0.35 <sup>†</sup> |
| Garlic                 | 1 <sup>†</sup>  | 0.23±1.43 <sup>†</sup>             | 0.867±1.5 <sup>†</sup>  | 0.927±0.9 <sup>†</sup>  | 0.932±0.34 <sup>†</sup> | 0.931±0.63 <sup>†</sup> | 0.959±0.81 <sup>†</sup> | 0.984±0.25 <sup>†</sup> |
| Cardamom               | 1 <sup>†</sup>  | 0.147±1.7 <sup>†</sup>             | 0.935±0.34 <sup>†</sup> | 0.879±0.28 <sup>†</sup> | 0.851±1.63 <sup>†</sup> | 0.848±0.55 <sup>†</sup> | 0.828±0.32 <sup>†</sup> | 0.913±0.81 <sup>†</sup> |
| Mandarin               | 1 <sup>†</sup>  | 0.221±0.61 <sup>†</sup>            | 0.902±0.93 <sup>†</sup> | 0.932±0.43 <sup>†</sup> | 0.95±0.71 <sup>†</sup>  | 0.951±0.63 <sup>†</sup> | 0.911±0.32 <sup>†</sup> | 0.887±0.54 <sup>†</sup> |
| Hyssop                 | 1 <sup>†</sup>  | 0.163±0.9 <sup>†</sup>             | 0.891±0.91 <sup>†</sup> | 0.88±0.43 <sup>†</sup>  | 0.895±0.82 <sup>†</sup> | 0.917±1.03 <sup>†</sup> | 0.937±1.14 <sup>†</sup> | 0.958±0.54 <sup>†</sup> |
| Grapefruit             | 1 <sup>†</sup>  | 0.073±0.83 <sup>†</sup>            | 0.854±0.72 <sup>†</sup> | 0.843±1.72 <sup>†</sup> | 0.836±0.62 <sup>†</sup> | 0.819±0.85 <sup>†</sup> | 0.775±1.36 <sup>†</sup> | 0.765±0.91 <sup>†</sup> |
| Lemongrass             | 1 <sup>†</sup>  | 0.141±0.47 <sup>†</sup>            | 0.874±0.74 <sup>†</sup> | 0.853±1.37 <sup>†</sup> | 0.861±0.62 <sup>†</sup> | 0.909±1.63 <sup>†</sup> | 0.912±0.61 <sup>†</sup> | 0.879±0.96 <sup>†</sup> |
| Siberian pine          | 1 <sup>†</sup>  | 0.088±0.32 <sup>†</sup>            | 0.853±0.48 <sup>†</sup> | 0.817±0.92 <sup>†</sup> | 0.828±1.36 <sup>†</sup> | 0.831±0.85 <sup>†</sup> | 0.949±0.62 <sup>†</sup> | 0.887±0.53 <sup>†</sup> |
| Camphor                | 1 <sup>†</sup>  | 0.264±0.51 <sup>†</sup>            | 0.856±0.67 <sup>†</sup> | 0.879±0.9 <sup>†</sup>  | 0.885±0.57 <sup>†</sup> | 0.896±0.65 <sup>†</sup> | 0.908±0.73 <sup>†</sup> | 0.935±1.3 <sup>†</sup>  |
| Cade                   | 1 <sup>†</sup>  | 0.097±0.43 <sup>†</sup>            | 0.833±0.72 <sup>†</sup> | 0.810±0.81 <sup>†</sup> | 0.873±0.52 <sup>†</sup> | 0.884±1.9 <sup>†</sup>  | 0.908±0.74 <sup>†</sup> | 0.942±0.71 <sup>†</sup> |
| Cedar leaves           | 1 <sup>†</sup>  | 0.108±0.56 <sup>†</sup>            | 0.826±0.53 <sup>†</sup> | 0.856±1.31 <sup>†</sup> | 0.859±0.7 <sup>†</sup>  | 0.901±0.81 <sup>†</sup> | 0.934±0.51 <sup>†</sup> | 0.941±0.21 <sup>†</sup> |
| Ginger                 | 1 <sup>†</sup>  | 0.17±1.12 <sup>†</sup>             | 0.855±0.72 <sup>†</sup> | 0.897±0.23              | 0.913±0.41 <sup>†</sup> | 0.924±1.9 <sup>†</sup>  | 0.937±0.23 <sup>†</sup> | 0.944±0.64 <sup>†</sup> |
| Cumin                  | 1 <sup>†</sup>  | 0.157±0.56 <sup>†</sup>            | 0.95±0.77 <sup>†</sup>  | 0.88±0.52 <sup>†</sup>  | 0.883±0.43 <sup>†</sup> | 0.91±1.38 <sup>†</sup>  | 0.927±0.82 <sup>†</sup> | 0.952±0.73 <sup>†</sup> |
| Patchouli              | 1 <sup>†</sup>  | 0.083±1.9 <sup>†</sup>             | 0.897±0.52 <sup>†</sup> | 0.811±0.56 <sup>†</sup> | 0.829±0.53 <sup>†</sup> | 0.866±1.25 <sup>†</sup> | 0.875±1.85 <sup>†</sup> | 0.878±0.72 <sup>†</sup> |
| Orange bitter          | 1 <sup>†</sup>  | 0.085±1.03 <sup>†</sup>            | 0.921±0.62 <sup>†</sup> | 0.837±0.37 <sup>†</sup> | 0.871±0.42 <sup>†</sup> | 0.889±0.61 <sup>†</sup> | 0.902±0.73 <sup>†</sup> | 0.929±1.02 <sup>†</sup> |
| Eucalyptus             | 1 <sup>†</sup>  | 0.113±0.18 <sup>†</sup>            | 0.724±1.56 <sup>†</sup> | 0.805±0.64 <sup>†</sup> | 0.815±0.62 <sup>†</sup> | 0.828±0.82 <sup>†</sup> | 0.847±0.72 <sup>†</sup> | 0.879±0.8 <sup>†</sup>  |
| Pine silvestre natural | 1 <sup>†</sup>  | 0.185±0.42 <sup>†</sup>            | 0.939±0.6 <sup>†</sup>  | 0.809±1.3 <sup>†</sup>  | 0.842±0.34 <sup>†</sup> | 0.854±0.3 <sup>†</sup>  | 0.869±1.9 <sup>†</sup>  | 0.872±0.6 <sup>†</sup>  |
| Bergamot               | 1 <sup>†</sup>  | 0.048±0.56 <sup>†</sup>            | 0.919±0.73 <sup>†</sup> | 0.818±0.9 <sup>†</sup>  | 0.822±0.91 <sup>†</sup> | 0.845±1.02 <sup>†</sup> | 0.859±0.23 <sup>†</sup> | 0.899±0.52 <sup>†</sup> |
| Juniper                | 1 <sup>†</sup>  | 0.168±0.34 <sup>†</sup>            | 0.957±0.27 <sup>†</sup> | 0.778±1.04 <sup>†</sup> | 0.805±0.43 <sup>†</sup> | 0.809±0.54 <sup>†</sup> | 0.821±0.72 <sup>†</sup> | 0.950±0.81 <sup>†</sup> |
| Birch                  | 1 <sup>†</sup>  | 0.118±0.61 <sup>†</sup>            | 0.905±0.8 <sup>†</sup>  | 0.962±1.6 <sup>†</sup>  | 0.93±0.53 <sup>†</sup>  | 0.943±0.43 <sup>†</sup> | 0.953±0.72 <sup>†</sup> | 0.973±1.4 <sup>†</sup>  |
| Fennel                 | 1 <sup>†</sup>  | 0.175±0.7 <sup>†</sup>             | 0.896±0.58 <sup>†</sup> | 0.897±1.2 <sup>†</sup>  | 0.902±0.57 <sup>†</sup> | 0.906±1.5 <sup>†</sup>  | 0.913±1.5 <sup>†</sup>  | 0.946±1.36 <sup>†</sup> |
| Cedar fruit            | 1 <sup>†</sup>  | 0.106±0.32 <sup>†</sup>            | 0.987±0.32 <sup>†</sup> | 0.971±0.5 <sup>†</sup>  | 0.932±0.91 <sup>†</sup> | 0.883±0.51 <sup>†</sup> | 0.873±0.82 <sup>†</sup> | 0.866±0.41 <sup>†</sup> |
| Lemon                  | 1 <sup>†</sup>  | 0.189±0.26 <sup>†</sup>            | 0.899±0.72 <sup>†</sup> | 0.881±1.4 <sup>†</sup>  | 0.861±1.54 <sup>†</sup> | 0.840±0.9 <sup>†</sup>  | 0.83±0.92 <sup>†</sup>  | 0.81±1.25 <sup>†</sup>  |
| Roman chamomile        | 1 <sup>†</sup>  | 0.210±0.43 <sup>†</sup>            | 0.83±1.46 <sup>†</sup>  | 0.873±0.54 <sup>†</sup> | 0.84±0.34 <sup>†</sup>  | 0.826±0.4 <sup>†</sup>  | 0.816±0.57 <sup>†</sup> | 0.809±1.8 <sup>†</sup>  |
| Savory                 | 1 <sup>†</sup>  | 0.071±0.92 <sup>†</sup>            | 0.902±0.92 <sup>†</sup> | 0.808±0.35 <sup>†</sup> | 0.812±0.83 <sup>†</sup> | 0.839±1.23 <sup>†</sup> | 0.85±0.57 <sup>†</sup>  | 0.86±0.22 <sup>†</sup>  |
| Rosemary               | 1 <sup>†</sup>  | 0.17±0.23 <sup>†</sup>             | 0.82±0.84 <sup>†</sup>  | 0.851±0.64 <sup>†</sup> | 0.86±0.56 <sup>†</sup>  | 0.885±1.03 <sup>†</sup> | 0.894±0.59 <sup>†</sup> | 0.927±0.32 <sup>†</sup> |
| Ceylon cinnamon peel   | 1 <sup>†</sup>  | 0.101±0.34 <sup>†</sup>            | 0.882±0.67 <sup>†</sup> | 0.898±1.37 <sup>†</sup> | 0.911±0.34 <sup>†</sup> | 0.929±0.81 <sup>†</sup> | 0.937±1.17 <sup>†</sup> | 0.941±0.59 <sup>†</sup> |
| Eucalyptus globulus    | 1 <sup>†</sup>  | 0.138±1.12 <sup>†</sup>            | 0.827±0.45 <sup>†</sup> | 0.862±0.62 <sup>†</sup> | 0.866±1.9 <sup>†</sup>  | 0.888±1.2 <sup>†</sup>  | 0.906±0.6 <sup>†</sup>  | 0.951±0.78 <sup>†</sup> |
| Orange sweet           | 1 <sup>†</sup>  | 0.239±1.02 <sup>†</sup>            | 0.878±0.34 <sup>†</sup> | 0.930±1.53 <sup>†</sup> | 0.953±0.64 <sup>†</sup> | 0.95±0.82 <sup>†</sup>  | 0.96±0.81 <sup>†</sup>  | 0.962±1.17 <sup>†</sup> |
| Niaouly                | 1 <sup>†</sup>  | 0.184±0.32 <sup>†</sup>            | 0.95±0.45 <sup>†</sup>  | 0.926±0.54 <sup>†</sup> | 0.964±0.12 <sup>†</sup> | 0.896±1.09 <sup>†</sup> | 0.84±1.14               | 0.801±1.01 <sup>†</sup> |

|                                        |                 |                          |                         |                         |                         |                         |                         |                         |
|----------------------------------------|-----------------|--------------------------|-------------------------|-------------------------|-------------------------|-------------------------|-------------------------|-------------------------|
| Artemisia                              | 1 <sup>†</sup>  | 0.179±0.32 <sup>†</sup>  | 0.826±0.85 <sup>†</sup> | 0.915±0.43 <sup>†</sup> | 0.901±1.8 <sup>†</sup>  | 0.900±0.47 <sup>†</sup> | 0.928±0.77 <sup>†</sup> | 0.944±1.04 <sup>†</sup> |
| Cajeput                                | 1 <sup>†</sup>  | 0.143±0.53 <sup>†</sup>  | 0.832±0.92 <sup>†</sup> | 0.877±0.72 <sup>†</sup> | 0.884±0.42 <sup>†</sup> | 0.925±0.46 <sup>†</sup> | 0.933±0.64 <sup>†</sup> | 0.955±0.52 <sup>†</sup> |
| Black pepper                           | 1 <sup>††</sup> | 0.159±0.71 <sup>††</sup> | 0.864±0.3 <sup>†</sup>  | 0.93±0.47 <sup>†</sup>  | 0.898±0.32 <sup>†</sup> | 0.888±0.4 <sup>†</sup>  | 0.877±1.11 <sup>†</sup> | 0.852±0.45 <sup>†</sup> |
| White thyme                            | 1 <sup>†</sup>  | 0.133±1.02 <sup>†</sup>  | 0.861±1.3 <sup>†</sup>  | 0.831±0.8 <sup>†</sup>  | 0.870±0.71 <sup>†</sup> | 0.835±1.03 <sup>†</sup> | 0.858±0.32 <sup>†</sup> | 0.879±1.02 <sup>†</sup> |
| Marjoram                               | 1 <sup>††</sup> | 0.106±1.15 <sup>††</sup> | 0.859±0.34 <sup>†</sup> | 0.869±0.26 <sup>†</sup> | 0.846±0.28 <sup>†</sup> | 0.882±0.45 <sup>†</sup> | 0.896±0.56 <sup>†</sup> | 0.94±0.62 <sup>†</sup>  |
| Clove                                  | 1 <sup>†</sup>  | 0.146±0.52 <sup>†</sup>  | 0.919±1.07 <sup>†</sup> | 0.894±0.71 <sup>†</sup> | 0.904±0.93 <sup>†</sup> | 0.872±1.3 <sup>†</sup>  | 0.818±0.4 <sup>†</sup>  | 0.779±1.5 <sup>††</sup> |
| Cypress                                | 1 <sup>††</sup> | 0.104±0.34 <sup>††</sup> | 0.824±1.4 <sup>†</sup>  | 0.815±0.3 <sup>†</sup>  | 0.861±0.43 <sup>†</sup> | 0.858±0.3 <sup>†</sup>  | 0.871±1.02 <sup>†</sup> | 0.910±0.8 <sup>†</sup>  |
| Nutmeg natural                         | 1 <sup>†</sup>  | 0.154±0.52 <sup>†</sup>  | 0.853±0.48 <sup>†</sup> | 0.890±1.3 <sup>†</sup>  | 0.899±0.56 <sup>†</sup> | 0.911±0.13 <sup>†</sup> | 0.921±0.34 <sup>†</sup> | 0.951±1.5 <sup>†</sup>  |
| Peppermint                             | 1 <sup>†</sup>  | 0.179±1.04 <sup>†</sup>  | 0.816±0.5 <sup>†</sup>  | 0.808±0.43 <sup>†</sup> | 0.817±0.26 <sup>†</sup> | 0.875±1.2 <sup>†</sup>  | 0.879±1.4 <sup>†</sup>  | 0.931±0.43 <sup>†</sup> |
| Verbena                                | 1 <sup>†</sup>  | 0.113±1.72 <sup>†</sup>  | 0.967±0.6 <sup>†</sup>  | 0.916±0.69 <sup>†</sup> | 0.923±1.6 <sup>†</sup>  | 0.929±0.69 <sup>†</sup> | 0.958±0.32 <sup>†</sup> | 0.974±0.48 <sup>†</sup> |
| Basil                                  | 1 <sup>†</sup>  | 0.162±0.42 <sup>†</sup>  | 0.978±0.13 <sup>†</sup> | 0.907±0.6 <sup>†</sup>  | 0.909±0.51 <sup>†</sup> | 0.911±0.38 <sup>†</sup> | 0.931±0.67 <sup>†</sup> | 0.949±0.45 <sup>†</sup> |
| Palmarosa                              | 1 <sup>††</sup> | 0.160±0.54 <sup>††</sup> | 0.945±1.02 <sup>†</sup> | 0.917±0.32 <sup>†</sup> | 0.925±0.47 <sup>†</sup> | 0.932±0.61 <sup>†</sup> | 0.943±0.32 <sup>†</sup> | 0.972±1.13 <sup>†</sup> |
| Laurel                                 | 1 <sup>†</sup>  | 0.076±0.51 <sup>†</sup>  | 0.906±0.93 <sup>†</sup> | 0.945±1.4 <sup>†</sup>  | 0.952±0.55 <sup>†</sup> | 0.973±0.54 <sup>†</sup> | 0.952±1.03 <sup>†</sup> | 0.984±0.45 <sup>†</sup> |
| Narural anise pure                     | 1 <sup>†</sup>  | 0.199±0.9 <sup>†</sup>   | 0.944±0.43 <sup>†</sup> | 0.894±1.6 <sup>†</sup>  | 0.899±0.4 <sup>†</sup>  | 0.926±0.54 <sup>†</sup> | 0.928±1.03 <sup>†</sup> | 0.963±0.4 <sup>†</sup>  |
| Incense                                | 1 <sup>†</sup>  | 0.077±0.81 <sup>†</sup>  | 0.843±0.59 <sup>†</sup> | 0.819±1.65 <sup>†</sup> | 0.88±0.91 <sup>†</sup>  | 0.908±0.5 <sup>†</sup>  | 0.916±1.12 <sup>†</sup> | 0.937±1.9 <sup>†</sup>  |
| <i>Mentha suaveolens</i> (Sicily)      | 1 <sup>†</sup>  | 0.089±1.32 <sup>†</sup>  | 0.858±0.32 <sup>†</sup> | 0.863±1.34 <sup>†</sup> | 0.888±0.5 <sup>†</sup>  | 0.898±1.01 <sup>†</sup> | 0.88±1.36 <sup>†</sup>  | 0.93±1.4 <sup>†</sup>   |
| <i>Coridottymus capitatus</i> (Sicily) | 1 <sup>†</sup>  | 0.114±1.03 <sup>†</sup>  | 0.885±0.8 <sup>†</sup>  | 0.878±0.43 <sup>†</sup> | 0.861±1.02 <sup>†</sup> | 0.864±0.92 <sup>†</sup> | 0.870±1.4 <sup>†</sup>  | 0.882±0.71 <sup>†</sup> |
| <i>Thymus vulgaris</i> (Sicily)        | 1 <sup>†</sup>  | 0.172±0.43 <sup>†</sup>  | 0.962±0.3 <sup>†</sup>  | 0.904±1.11 <sup>†</sup> | 0.909±1.4 <sup>†</sup>  | 0.917±0.6 <sup>†</sup>  | 0.947±0.67 <sup>†</sup> | 0.983±0.3 <sup>†</sup>  |
| <i>Origanum Hirtum</i> (Sicily)        | 1 <sup>†</sup>  | 0.091±0.52 <sup>†</sup>  | 0.902±0.68 <sup>†</sup> | 0.868±1.3 <sup>†</sup>  | 0.874±0.5 <sup>†</sup>  | 0.889±0.43 <sup>†</sup> | 0.909±1.26 <sup>†</sup> | 0.938±0.45 <sup>†</sup> |

<sup>a</sup>The values are mean ± S.D. from three independent experiments <sup>b</sup>NC: negative control, DNA control

<sup>c</sup>PC: positive control, DNA damage control <sup>d</sup>Quercetin:100 µg/mL, standard drug. \**p* < 0.05 when compared with the negative control <sup>†</sup>*p* < 0.05 when compared with the positive control <sup>††</sup>*p* < 0.05 when compared with the standard.

**Table S5.** DNA protective potential of selected 61 commercial essential oils on hydroxyl radical–induced DNA damage

|                        | NC <sup>b</sup> | PC <sup>c</sup>          | Relative band density <sup>a</sup> |                          |                          |                          |                          |                          |
|------------------------|-----------------|--------------------------|------------------------------------|--------------------------|--------------------------|--------------------------|--------------------------|--------------------------|
|                        |                 |                          | Quercetin <sup>d</sup>             | 25 µg/mL                 | 50 µg/mL                 | 100 µg/mL                | 200 µg/mL                | 400 µg/mL                |
| Chamomile morocco      | 1 <sup>††</sup> | 0.078±0.9 <sup>†</sup>   | 0.723±1.32 <sup>††</sup>           | 0.823±1.2 <sup>†</sup>   | 0.846±1.03 <sup>†</sup>  | 0.850±0.9 <sup>†</sup>   | 0.917±0.18 <sup>†</sup>  | 0.935±0.51 <sup>†</sup>  |
| Clary sage             | 1 <sup>†</sup>  | 0.06±0.61 <sup>††</sup>  | 0.857±0.8 <sup>†</sup>             | 0.956±0.12 <sup>†</sup>  | 0.961±0.91 <sup>†</sup>  | 0.938±0.32 <sup>†</sup>  | 0.837±0.5 <sup>†</sup>   | 0.781±0.67 <sup>††</sup> |
| Sage oil               | 1 <sup>††</sup> | 0.146±0.23 <sup>†</sup>  | 0.735±0.5 <sup>†</sup>             | 0.921±0.91 <sup>†</sup>  | 0.908±0.51 <sup>†</sup>  | 0.851±0.6 <sup>†</sup>   | 0.778±0.8 <sup>†</sup>   | 0.723±0.21 <sup>††</sup> |
| Red thyme              | 1 <sup>†</sup>  | 0.126±0.82 <sup>†</sup>  | 0.839±1.43 <sup>†</sup>            | 0.997±0.91 <sup>†</sup>  | 0.903±0.45 <sup>†</sup>  | 0.894±1.43 <sup>†</sup>  | 0.833±0.23 <sup>†</sup>  | 0.810±1.23 <sup>†</sup>  |
| Tea tree               | 1 <sup>††</sup> | 0.042±0.51 <sup>††</sup> | 0.778±0.64 <sup>††</sup>           | 0.864±0.11 <sup>†</sup>  | 0.848±0.22 <sup>†</sup>  | 0.840±0.6 <sup>†</sup>   | 0.842±0.23 <sup>†</sup>  | 0.854±0.33 <sup>†</sup>  |
| Melissa                | 1 <sup>†</sup>  | 0.036±0.24 <sup>††</sup> | 0.801±0.34 <sup>†</sup>            | 0.818±0.91 <sup>†</sup>  | 0.810±1.03 <sup>†</sup>  | 0.808±1.03 <sup>†</sup>  | 0.872±1.05 <sup>†</sup>  | 0.844±0.38 <sup>†</sup>  |
| Mountain pine          | 1 <sup>†</sup>  | 0.073±0.74 <sup>††</sup> | 0.832±0.41 <sup>†</sup>            | 0.81±0.32 <sup>†</sup>   | 0.870±1.23 <sup>†</sup>  | 0.874±1.11 <sup>†</sup>  | 0.966±0.32 <sup>†</sup>  | 0.982±0.37 <sup>†</sup>  |
| Geranium bourbon       | 1 <sup>†</sup>  | 0.104±0.61 <sup>††</sup> | 0.809±1.4 <sup>†</sup>             | 0.908±0.43 <sup>†</sup>  | 0.92±0.78 <sup>†</sup>   | 0.95±0.12 <sup>†</sup>   | 0.97±0.72 <sup>†</sup>   | 0.99±1.43 <sup>†</sup>   |
| Oregano                | 1 <sup>††</sup> | 0.042±0.66 <sup>††</sup> | 0.799±0.61 <sup>††</sup>           | 0.858±0.28 <sup>†</sup>  | 0.851±0.92 <sup>†</sup>  | 0.877±0.83 <sup>†</sup>  | 0.910±0.54 <sup>†</sup>  | 0.939±1.04 <sup>†</sup>  |
| Ylang-ylang            | 1 <sup>†</sup>  | 0.094±0.12 <sup>††</sup> | 0.872±0.25 <sup>†</sup>            | 0.878±0.37 <sup>†</sup>  | 0.895±0.34 <sup>†</sup>  | 0.908±0.21 <sup>†</sup>  | 0.931±0.23 <sup>†</sup>  | 0.946±0.23 <sup>†</sup>  |
| Coriander              | 1 <sup>†</sup>  | 0.082±0.81 <sup>††</sup> | 0.931±0.75 <sup>†</sup>            | 0.843±0.23 <sup>†</sup>  | 0.828±0.61 <sup>†</sup>  | 0.805±1.3 <sup>†</sup>   | 0.743±0.5 <sup>††</sup>  | 0.713±1.9 <sup>††</sup>  |
| Lavander               | 1 <sup>††</sup> | 0.040±0.64 <sup>††</sup> | 0.793±1.6 <sup>††</sup>            | 0.893±1.18 <sup>†</sup>  | 0.887±1.9 <sup>†</sup>   | 0.877±0.54 <sup>†</sup>  | 0.897±0.33 <sup>†</sup>  | 0.931±0.24 <sup>†</sup>  |
| Myrtle                 | 1 <sup>††</sup> | 0.054±0.12 <sup>††</sup> | 0.780±0.4 <sup>††</sup>            | 0.87±0.37 <sup>†</sup>   | 0.865±0.11 <sup>†</sup>  | 0.883±0.65 <sup>†</sup>  | 0.892±0.57 <sup>†</sup>  | 0.94±0.37 <sup>†</sup>   |
| Garlic                 | 1 <sup>†</sup>  | 0.063±0.23 <sup>††</sup> | 0.835±0.14 <sup>†</sup>            | 0.908±0.32 <sup>†</sup>  | 0.900±0.34 <sup>†</sup>  | 0.868±1.23 <sup>†</sup>  | 0.805±0.32 <sup>†</sup>  | 0.67±0.53 <sup>††</sup>  |
| Cardamom               | 1 <sup>†</sup>  | 0.017±0.11 <sup>††</sup> | 0.848±0.32 <sup>†</sup>            | 0.857±0.54 <sup>†</sup>  | 0.854±0.81 <sup>†</sup>  | 0.815±0.15 <sup>†</sup>  | 0.89±0.81 <sup>†</sup>   | 0.96±0.11 <sup>†</sup>   |
| Mandarin               | 1 <sup>†</sup>  | 0.196±0.36 <sup>††</sup> | 0.879±0.35 <sup>†</sup>            | 0.800±0.31 <sup>†</sup>  | 0.826±0.41 <sup>†</sup>  | 0.835±0.6 <sup>†</sup>   | 0.843±0.4 <sup>†</sup>   | 0.879±0.84 <sup>†</sup>  |
| Hyssop                 | 1 <sup>††</sup> | 0.011±0.23 <sup>††</sup> | 0.724±1.3 <sup>††</sup>            | 0.804±1.3 <sup>†</sup>   | 0.877±1.44 <sup>†</sup>  | 0.930±0.16 <sup>†</sup>  | 0.931±0.42 <sup>†</sup>  | 0.953±0.32 <sup>†</sup>  |
| Grapefruit             | 1 <sup>††</sup> | 0.059±0.32 <sup>††</sup> | 0.797±0.91 <sup>††</sup>           | 0.916±0.32 <sup>†</sup>  | 0.91±0.75 <sup>†</sup>   | 0.88±0.41 <sup>†</sup>   | 0.802±0.62 <sup>†</sup>  | 0.806±0.54 <sup>†</sup>  |
| Lemongrass             | 1 <sup>†</sup>  | 0.023±0.9 <sup>†</sup>   | 0.826±0.32 <sup>†</sup>            | 0.705±0.61 <sup>††</sup> | 0.719±0.34 <sup>††</sup> | 0.819±0.8 <sup>†</sup>   | 0.836±1.41 <sup>†</sup>  | 0.883±0.45 <sup>†</sup>  |
| Siberian pine          | 1 <sup>†</sup>  | 0.205±0.83 <sup>††</sup> | 0.869±0.51 <sup>†</sup>            | 0.751±0.8 <sup>†</sup>   | 0.73±0.34 <sup>††</sup>  | 0.735±1.43 <sup>††</sup> | 0.845±1.32 <sup>†</sup>  | 0.838±0.33 <sup>†</sup>  |
| Camphor                | 1 <sup>†</sup>  | 0.051±0.61 <sup>††</sup> | 0.992±0.2 <sup>†</sup>             | 0.954±0.43 <sup>†</sup>  | 0.922±1.32 <sup>†</sup>  | 0.952±0.43 <sup>†</sup>  | 0.974±0.71 <sup>†</sup>  | 0.984±0.61 <sup>†</sup>  |
| Cade                   | 1 <sup>†</sup>  | 0.134±0.81 <sup>††</sup> | 0.902±0.24 <sup>†</sup>            | 0.893±0.32 <sup>†</sup>  | 0.912±0.21 <sup>†</sup>  | 0.900±0.23 <sup>†</sup>  | 0.883±0.21 <sup>†</sup>  | 0.866±0.32 <sup>†</sup>  |
| Cedar leaves           | 1 <sup>†</sup>  | 0.144±0.76 <sup>††</sup> | 0.970±0.23 <sup>†</sup>            | 0.951±0.5 <sup>†</sup>   | 0.915±0.32 <sup>†</sup>  | 0.872±0.32 <sup>†</sup>  | 0.793±0.61 <sup>††</sup> | 0.739±0.4 <sup>††</sup>  |
| Ginger                 | 1 <sup>††</sup> | 0.161±0.91 <sup>††</sup> | 0.73±0.41 <sup>††</sup>            | 0.807±1.8 <sup>†</sup>   | 0.840±0.11 <sup>†</sup>  | 0.869±0.32 <sup>†</sup>  | 0.891±0.35 <sup>†</sup>  | 0.936±0.16 <sup>††</sup> |
| Cumin                  | 1 <sup>††</sup> | 0.048±0.15 <sup>††</sup> | 0.745±0.3 <sup>††</sup>            | 0.787±0.24 <sup>††</sup> | 0.831±0.62 <sup>†</sup>  | 0.846±0.63 <sup>†</sup>  | 0.925±0.48 <sup>††</sup> | 0.968±1.54 <sup>††</sup> |
| Patchouli              | 1 <sup>†</sup>  | 0.089±0.42 <sup>††</sup> | 0.823±1.9 <sup>†</sup>             | 0.847±1.8 <sup>†</sup>   | 0.862±0.74               | 0.884±0.65 <sup>†</sup>  | 0.944±0.52 <sup>†</sup>  | 0.968±1.12 <sup>†</sup>  |
| Orange bitter          | 1 <sup>†</sup>  | 0.084±0.5 <sup>†</sup>   | 0.962±0.21 <sup>†</sup>            | 0.832±1.2 <sup>†</sup>   | 0.902±0.55 <sup>†</sup>  | 0.907±1.9 <sup>†</sup>   | 0.895±0.17 <sup>†</sup>  | 0.904±1.13 <sup>†</sup>  |
| Eucalyptus             | 1 <sup>††</sup> | 0.059±0.71 <sup>††</sup> | 0.710±0.32 <sup>††</sup>           | 0.795±0.32 <sup>††</sup> | 0.854±1.16 <sup>†</sup>  | 0.892±0.31 <sup>†</sup>  | 0.926±1.05 <sup>††</sup> | 0.973±1.03 <sup>††</sup> |
| Pine silvestre natural | 1 <sup>†</sup>  | 0.056±0.14 <sup>††</sup> | 0.896±0.83 <sup>†</sup>            | 0.893±0.84 <sup>†</sup>  | 0.882±0.34 <sup>†</sup>  | 0.868±0.77 <sup>†</sup>  | 0.828±0.61 <sup>†</sup>  | 0.789±0.23 <sup>††</sup> |
| Bergamot               | 1 <sup>†</sup>  | 0.115±0.1 <sup>††</sup>  | 0.802±0.23 <sup>†</sup>            | 0.60±1.23 <sup>††</sup>  | 0.67±0.45 <sup>††</sup>  | 0.795±0.33 <sup>††</sup> | 0.814±0.7 <sup>†</sup>   | 0.877±0.9 <sup>†</sup>   |
| Juniper                | 1 <sup>††</sup> | 0.081±0.33 <sup>††</sup> | 0.693±0.21 <sup>††</sup>           | 0.842±0.32 <sup>†</sup>  | 0.898±0.23 <sup>††</sup> | 0.870±0.72 <sup>†</sup>  | 0.754±0.51 <sup>††</sup> | 0.668±0.34 <sup>††</sup> |
| Birch                  | 1 <sup>††</sup> | 0.058±0.24 <sup>††</sup> | 0.772±0.23 <sup>††</sup>           | 0.873±0.33 <sup>†</sup>  | 0.838±0.46 <sup>†</sup>  | 0.803±0.7 <sup>†</sup>   | 0.767±0.8 <sup>†</sup>   | 0.718±0.21 <sup>††</sup> |
| Fennel                 | 1 <sup>††</sup> | 0.184±0.8 <sup>†</sup>   | 0.731±0.22 <sup>††</sup>           | 0.833±0.18 <sup>†</sup>  | 0.887±0.23 <sup>†</sup>  | 0.896±0.92 <sup>†</sup>  | 0.928±1.92 <sup>†</sup>  | 0.979±1.8 <sup>††</sup>  |
| Cedar fruit            | 1 <sup>††</sup> | 0.040±0.23 <sup>††</sup> | 0.713±0.21 <sup>††</sup>           | 0.740±0.27 <sup>††</sup> | 0.721±0.23 <sup>††</sup> | 0.859±0.81 <sup>†</sup>  | 0.891±0.54 <sup>†</sup>  | 0.961±0.37 <sup>††</sup> |
| Lemon                  | 1 <sup>††</sup> | 0.048±0.34 <sup>††</sup> | 0.745±0.22 <sup>††</sup>           | 0.744±0.54 <sup>††</sup> | 0.770±0.21 <sup>††</sup> | 0.811±0.22 <sup>†</sup>  | 0.925±0.33 <sup>†</sup>  | 0.968±0.22 <sup>††</sup> |
| Roman chamomile        | 1 <sup>†</sup>  | 0.136±0.14 <sup>††</sup> | 0.916±0.61 <sup>†</sup>            | 0.893±1.31 <sup>†</sup>  | 0.872±0.61 <sup>†</sup>  | 0.833±1.8 <sup>†</sup>   | 0.819±1.8 <sup>†</sup>   | 0.813±0.3 <sup>†</sup>   |
| Savory                 | 1 <sup>††</sup> | 0.058±0.32 <sup>††</sup> | 0.704±1.34 <sup>††</sup>           | 0.840±1.71 <sup>†</sup>  | 0.86±0.3 <sup>†</sup>    | 0.892±0.32 <sup>†</sup>  | 0.913±0.9 <sup>†</sup>   | 0.981±1.8 <sup>††</sup>  |
| Rosemary               | 1 <sup>†</sup>  | 0.061±0.51 <sup>††</sup> | 0.889±0.63 <sup>†</sup>            | 0.828±0.5 <sup>†</sup>   | 0.847±0.62 <sup>†</sup>  | 0.856±0.36 <sup>†</sup>  | 0.876±1.23 <sup>†</sup>  | 0.925±0.72 <sup>†</sup>  |
| Ceylon cinnamon peel   | 1 <sup>†</sup>  | 0.20±0.33 <sup>††</sup>  | 0.861±0.37 <sup>†</sup>            | 0.751±0.55 <sup>††</sup> | 0.84±0.9 <sup>†</sup>    | 0.848±0.14 <sup>†</sup>  | 0.904±0.64 <sup>†</sup>  | 0.901±0.15 <sup>†</sup>  |
| Eucalyptus globulus    | 1 <sup>†</sup>  | 0.084±0.23 <sup>††</sup> | 0.926±0.18 <sup>†</sup>            | 0.859±0.61 <sup>†</sup>  | 0.891±1.7 <sup>†</sup>   | 0.954±0.4 <sup>†</sup>   | 0.962±1.43 <sup>†</sup>  | 0.999±0.17 <sup>†</sup>  |
| Orange sweet           | 1 <sup>†</sup>  | 0.089±0.54 <sup>††</sup> | 0.870±0.21 <sup>†</sup>            | 0.986±0.22 <sup>†</sup>  | 0.927±0.34 <sup>†</sup>  | 0.915±0.9 <sup>†</sup>   | 0.911±0.5 <sup>†</sup>   | 0.908±0.7 <sup>†</sup>   |

|                                        |                 |                          |                          |                          |                          |                          |                          |                          |
|----------------------------------------|-----------------|--------------------------|--------------------------|--------------------------|--------------------------|--------------------------|--------------------------|--------------------------|
| Niaouly                                | 1 <sup>†</sup>  | 0.182±0.32 <sup>†‡</sup> | 0.826±0.41 <sup>†</sup>  | 0.742±0.4 <sup>†‡</sup>  | 0.736±0.32 <sup>†‡</sup> | 0.732±0.56 <sup>†‡</sup> | 0.862±0.61 <sup>†</sup>  | 0.926±0.35 <sup>†</sup>  |
| Artemisia                              | 1 <sup>†</sup>  | 0.042±0.54 <sup>†‡</sup> | 0.825±0.67 <sup>†</sup>  | 0.861±0.21 <sup>†</sup>  | 0.908±0.24 <sup>†</sup>  | 0.924±0.81 <sup>†</sup>  | 0.929±0.92 <sup>†</sup>  | 0.926±0.54 <sup>†</sup>  |
| Cajeput                                | 1 <sup>†</sup>  | 0.121±0.63 <sup>†‡</sup> | 0.852±0.22 <sup>†</sup>  | 0.950±0.61 <sup>†</sup>  | 0.967±0.44 <sup>†</sup>  | 0.944±0.45 <sup>†</sup>  | 0.931±0.64 <sup>†</sup>  | 0.837±0.9 <sup>†</sup>   |
| Black pepper                           | 1 <sup>†‡</sup> | 0.036±0.52 <sup>†‡</sup> | 0.738±0.11 <sup>†‡</sup> | 0.957±0.13 <sup>†</sup>  | 0.904±0.72 <sup>†</sup>  | 0.895±0.92 <sup>†</sup>  | 0.850±0.7 <sup>†</sup>   | 0.760±0.91 <sup>†‡</sup> |
| White thyme                            | 1 <sup>†‡</sup> | 0.116±0.57 <sup>†‡</sup> | 0.787±0.34 <sup>†‡</sup> | 0.825±1.23 <sup>†</sup>  | 0.816±0.10 <sup>†</sup>  | 0.912±0.12 <sup>†</sup>  | 0.921±1.22 <sup>†</sup>  | 0.905±0.82 <sup>†</sup>  |
| Marjoram                               | 1 <sup>†‡</sup> | 0.064±0.5 <sup>†‡</sup>  | 0.765±0.34 <sup>†‡</sup> | 0.814±0.32 <sup>†</sup>  | 0.849±1.17 <sup>†</sup>  | 0.927±1.16 <sup>†</sup>  | 0.932±0.14 <sup>†</sup>  | 0.941±1.12 <sup>†</sup>  |
| Clove                                  | 1 <sup>†</sup>  | 0.077±0.12 <sup>†‡</sup> | 0.803±0.45 <sup>†</sup>  | 0.928±1.4 <sup>†</sup>   | 0.890±0.56 <sup>†</sup>  | 0.874±0.9 <sup>†</sup>   | 0.827±1.5 <sup>†</sup>   | 0.806±0.41 <sup>†</sup>  |
| Cypress                                | 1 <sup>†‡</sup> | 0.101±0.31 <sup>†‡</sup> | 0.680±0.31 <sup>†‡</sup> | 0.760±0.16 <sup>†‡</sup> | 0.706±0.16 <sup>†‡</sup> | 0.857±0.51 <sup>†</sup>  | 0.920±1.12 <sup>†</sup>  | 0.989±1.32 <sup>†‡</sup> |
| Nutmeg natural                         | 1 <sup>†</sup>  | 0.164±0.12 <sup>†‡</sup> | 0.891±0.87 <sup>†</sup>  | 0.873±0.34 <sup>†</sup>  | 0.839±0.21 <sup>†</sup>  | 0.826±0.74 <sup>†</sup>  | 0.821±0.54 <sup>†</sup>  | 0.813±0.31 <sup>†</sup>  |
| Peppermint                             | 1 <sup>†</sup>  | 0.052±0.2 <sup>†‡</sup>  | 0.871±0.31 <sup>†</sup>  | 0.788±0.18 <sup>†‡</sup> | 0.790±0.61 <sup>†‡</sup> | 0.830±0.48 <sup>†</sup>  | 0.824±1.15 <sup>†</sup>  | 0.948±1.02 <sup>†</sup>  |
| Verbena                                | 1 <sup>†</sup>  | 0.035±0.18 <sup>†‡</sup> | 0.974±0.71 <sup>†</sup>  | 0.932±0.7 <sup>†</sup>   | 0.926±0.71 <sup>†</sup>  | 0.814±0.23 <sup>†</sup>  | 0.731±1.01 <sup>†‡</sup> | 0.71±0.45 <sup>†‡</sup>  |
| Basil                                  | 1 <sup>†</sup>  | 0.061±0.51 <sup>†‡</sup> | 0.901±0.1 <sup>†</sup>   | 0.922±0.9 <sup>†</sup>   | 0.871±0.23 <sup>†</sup>  | 0.846±0.64 <sup>†</sup>  | 0.814±0.6 <sup>†</sup>   | 0.78±0.21 <sup>†‡</sup>  |
| Palmarosa                              | 1 <sup>†‡</sup> | 0.033±0.21 <sup>†‡</sup> | 0.795±0.33 <sup>†‡</sup> | 0.852±0.51 <sup>†</sup>  | 0.844±0.71 <sup>†</sup>  | 0.840±0.54 <sup>†</sup>  | 0.809±0.21 <sup>†</sup>  | 0.91±0.35 <sup>†</sup>   |
| Laurel                                 | 1 <sup>†</sup>  | 0.175±0.58 <sup>†‡</sup> | 0.884±0.24 <sup>†</sup>  | 0.935±0.54 <sup>†</sup>  | 0.904±0.6 <sup>†</sup>   | 0.877±0.32 <sup>†</sup>  | 0.839±0.8 <sup>†</sup>   | 0.824±0.22 <sup>†</sup>  |
| Natural anise pure                     | 1 <sup>†</sup>  | 0.058±0.3 <sup>†</sup>   | 0.883±1.2 <sup>†</sup>   | 0.818±1.52 <sup>†</sup>  | 0.826±1.14 <sup>†</sup>  | 0.881±1.62 <sup>†</sup>  | 0.910±0.61 <sup>†</sup>  | 0.906±0.54 <sup>†</sup>  |
| Incense                                | 1 <sup>†</sup>  | 0.055±0.5 <sup>†‡</sup>  | 0.827±0.52 <sup>†</sup>  | 0.805±0.54 <sup>†</sup>  | 0.816±0.43 <sup>†</sup>  | 0.917±1.45 <sup>†</sup>  | 0.953±0.91 <sup>†</sup>  | 0.979±1.04 <sup>†</sup>  |
| <i>Mentha suaveolens</i> (Sicily)      | 1 <sup>†</sup>  | 0.039±0.31 <sup>†‡</sup> | 0.826±1.3 <sup>†</sup>   | 0.858±0.32 <sup>†</sup>  | 0.867±0.44 <sup>†</sup>  | 0.875±1.09 <sup>†</sup>  | 0.954±1.04 <sup>†</sup>  | 0.97±1.03 <sup>†</sup>   |
| <i>Coridothymus capitatus</i> (Sicily) | 1 <sup>†‡</sup> | 0.065±0.2 <sup>†‡</sup>  | 0.755±0.8 <sup>†‡</sup>  | 0.821±1.6 <sup>†</sup>   | 0.973±0.37 <sup>†</sup>  | 0.981±1.16 <sup>†</sup>  | 0.947±0.5 <sup>†</sup>   | 0.987±1.05 <sup>†‡</sup> |
| <i>Thymus vulgaris</i> (Sicily)        | 1 <sup>†</sup>  | 0.157±0.56 <sup>†‡</sup> | 0.913±0.21 <sup>†</sup>  | 0.918±0.56 <sup>†</sup>  | 0.887±0.12 <sup>†</sup>  | 0.933±0.12 <sup>†</sup>  | 0.895±0.41 <sup>†</sup>  | 0.874±0.13 <sup>†</sup>  |
| <i>Origanum Hirtum</i> (Sicily)        | 1 <sup>†‡</sup> | 0.081±0.23 <sup>†‡</sup> | 0.736±0.51 <sup>†‡</sup> | 0.857±0.23 <sup>†</sup>  | 0.800±0.33 <sup>†</sup>  | 0.803±0.34 <sup>†</sup>  | 0.852±0.31 <sup>†</sup>  | 0.847±0.17 <sup>†</sup>  |

<sup>a</sup>The values are mean ± S.D. from three independent experiments <sup>b</sup>NC: negative control, DNA control

<sup>c</sup>PC: positive control, DNA damage control <sup>d</sup>Quercetin:100 µg/mL, standard drug. <sup>\*</sup>*p* < 0.05 when compared with the negative control <sup>†</sup>*p* < 0.05 when compared with the positive control <sup>†‡</sup>*p* < 0.05 when compared with the standard.

**Table S6.** List of dataset pretreatment parameters settings randomly varied during ML hyperparameters optimization.

| Parameter     | Settings                          | Description                                                                                                                                                                                                      |
|---------------|-----------------------------------|------------------------------------------------------------------------------------------------------------------------------------------------------------------------------------------------------------------|
| MinMaxScaling | True and False                    | Data were also processed using the MinMaxScaler function (scaling), which allows the original values to be scaled to values between 0 and 1. True and False indicated whether the dataset will be scaled or not. |
| n_level       | 0, 1, 2, 3, 4                     | This represent the number of least occurrences for EO's components to be maintained in the training set                                                                                                          |
| PCA           | 60 %, 70%, 80 %, 90 %, 99%, 100 % | Amount of variance extracted with the PCA. 100% indicate tha the whole EOs' data matrix was used but trasformed to avoid the usage of correlate variables.                                                       |

**Table S7.** List of the initial thresholds<sup>a</sup> used for the ML models' for each antioxidant evaluation.

|                    |                                                                                                                                                                                                          |
|--------------------|----------------------------------------------------------------------------------------------------------------------------------------------------------------------------------------------------------|
| M <sup>n+b</sup>   | [1.28, 1.316, 1.35, 1.418, 1.532, 1.608, 1.752]                                                                                                                                                          |
| DPPH <sup>c</sup>  | [0.63, 0.66, 0.688, 0.768, 0.84, 1.092]                                                                                                                                                                  |
| LOO <sup>d</sup>   | [0.18, 0.19, 0.231, 0.285, 0.346, 0.486, 0.576, 0.618, 0.694, 0.73, 0.9]                                                                                                                                 |
| ABTS <sup>+e</sup> | [0.089, 0.09, 0.097, 0.179, 0.314, 0.358, 0.494, 0.656, 0.68, 0.792, 0.87, 1.072]                                                                                                                        |
| OH <sup>f</sup>    | [0.098, 0.111, 0.16, 0.25, 0.286, 0.378, 0.504, 0.568, 0.664, 0.876]                                                                                                                                     |
| ROO <sup>g</sup>   | [113.05, 121.264, 128.934, 138.086, 140.312, 141.648, 149.372, 159.59, 164.548, 170.132, 172.46, 178.124, 188.624, 194.21, 195.976, 197.46, 197.55, 204.402, 209.534, 215.9, 250.942]                    |
| OH <sup>h</sup>    | [80.93, 82.598, 83.76, 85.588, 88.228, 89.69, 95.402, 95.99, 99.844, 103.924, 105.16, 114.562, 130.522, 133.102, 133.566, 134.938, 136.498, 138.076, 143.608, 143.962, 144.346, 147.19, 150.16, 157.662] |

<sup>a</sup> The thresholds were obtained by varying the percentiles between 0.1 and 0.6 at 0.01 increment. Percentile = 0.1 means that 10% of data has lower values at a given threshold, therefore are defined actives obtaining a dataset with unbalanced distribution towards inactives. Percentile = 0.5 means the dataset is perfectly divided in two as the threshold is the median value. Percentile = 0.6 indicates the number of actives is slightly higher than inactives <sup>b</sup>Metal ion chelating capacity <sup>c</sup>Neutralization of DPPH radical <sup>d</sup>Interruption of lipid peroxidation <sup>e</sup>Neutralization of ABTS cation radical <sup>f</sup>Neutralization of hydroxyl radical <sup>g</sup>Protection of DNA against the damage induced by the alkoxy radical <sup>h</sup>Protection of DNA against the damage induced by the hydroxyl radical

**Table S8.** Hyperparameters used for the ML models' through random search optimization at 100 and 1000 iterations.

| Algorithm | Parameters        | Settings                                   | Total Combinations |
|-----------|-------------------|--------------------------------------------|--------------------|
| RF        | class_weight      | list_weight                                | 42000              |
|           | n_estimators      | from 100 to 1100, step 50                  |                    |
|           | max_depth         | from 1 to 15, step 1                       |                    |
|           | min_samples_split | From 0.1 to 1.0, select 10 values          |                    |
|           | min_samples_leaf  | from 0.1 to 0.5, select 5 values           |                    |
| GB        | n_estimators      | from 10 to 210, step 10                    | 56000              |
|           | max_depth         | from 1 to 15, step 1                       |                    |
|           | min_samples_leaf  | from 0.1 to 0.5, select 5 values           |                    |
|           | min_samples_split | from 0.1 to 1.0, select 10 values          |                    |
|           | max_features      | auto, sqrt, log2, None                     |                    |
| SVM       | class_weight      | list_weight                                | 800                |
|           | C                 | from 0.001 to 100, select 100 values       |                    |
|           | kernel            | linear, poly, rbf, sigmoid                 |                    |
|           | probability       | TRUE                                       |                    |
| DT        | class_weight      | list_weight                                | 22400              |
|           | criterion         | gini, entropy                              |                    |
|           | splitter          | best, random                               |                    |
|           | max_depth         | from 1 to 15, step 1                       |                    |
|           | min_samples_split | from 0.1 to 1.0, select 10 values          |                    |
|           | min_samples_leaf  | from 0.1 to 0.5, select 5 values           |                    |
|           | max_features      | auto, sqrt, log2, None                     |                    |
| KNN       | n_neighbors       | from 5 to 35, step 5                       | 9600               |
|           | weights           | uniform, distance                          |                    |
|           | algorithm         | auto, ball_tree, kd_tree, brute            |                    |
|           | leaf_size         | from 5 to 55, step 5                       |                    |
|           | metric            | minkowski, euclidean, manhattan, chebyshev |                    |
|           | metric_params     | None                                       |                    |
|           | p                 | 1, 2, 3, 4, 5                              |                    |

**Table S9.** List of hyperparameters setting used for the ML models' through random search optimization performed at 10000 and 100000 iterations.

| Algorithm | Parameters        | Settings                                   | Total Combinations |
|-----------|-------------------|--------------------------------------------|--------------------|
| RF        | class_weight      | list_weight                                | 210000000          |
|           | n_estimators      | from 1 to 1001, step 1                     |                    |
|           | max_depth         | from 1 to 15, step 1                       |                    |
|           | min_samples_split | From 0.1 to 1.0, select 100 values         |                    |
|           | min_samples_leaf  | from 0.1 to 0.5, select 50 values          |                    |
| GB        | n_estimators      | from 1 to 201, step 1                      | 56000000           |
|           | max_depth         | from 1 to 15, step 1                       |                    |
|           | min_samples_leaf  | from 0.1 to 0.5, select 50 values          |                    |
|           | min_samples_split | from 0.1 to 1.0, select 100 values         |                    |
|           | max_features      | auto, sqrt, log2, None                     |                    |
| SVM       | class_weight      | list_weight                                | 8000               |
|           | C                 | from 0.001 to 100, select 1000 values      |                    |
|           | kernel            | linear, poly, rbf, sigmoid                 |                    |
|           | probability       | TRUE                                       |                    |
| DT        | class_weight      | list_weight                                | 1680000            |
|           | criterion         | gini, entropy                              |                    |
|           | splitter          | best, random                               |                    |
|           | max_depth         | from 1 to 15, step 1                       |                    |
|           | min_samples_split | from 0.1 to 1.0, select 100 values         |                    |
|           | min_samples_leaf  | from 0.1 to 0.5, select 50 values          |                    |
|           | max_features      | auto, sqrt, log2, None                     |                    |
| KNN       | n_neighbors       | from 5 to 35, step 1                       | 240000             |
|           | weights           | uniform, distance                          |                    |
|           | algorithm         | auto, ball_tree, kd_tree, brute            |                    |
|           | leaf_size         | from 1 to 51, step 1                       |                    |
|           | metric            | minkowski, euclidean, manhattan, chebyshev |                    |
|           | metric_params     | None                                       |                    |
|           | p                 | 1, 2, 3, 4, 5                              |                    |

## Final ML Models Development

The datasets were divided into training set and test set using Stratified K fold at 5 groups. Predictive ability was evaluated by the mean of  $MCC_{Pred}$  values obtained.

### 1. $M^{n+}$

#### 1.1. 100 random iterations.

During the random search with 100 iterations, the classifiers used were: SVM, GB, KNN, RF and DT with the threshold listed in Table S7.

**Table S10.** Coarse best models obtained for each classifier.

| # Model | Threshold | ML  | Average $MCC_{Pred}$ | Average Normalized $MCC_{Pred}$ | $MCC_{Fit}$ | $MCC_{CV}$ | Average $ACC_{Pred}$ | Average $F1_{Pred}$ | Average $ROC\_AUC_{Pred}$ |
|---------|-----------|-----|----------------------|---------------------------------|-------------|------------|----------------------|---------------------|---------------------------|
| MN1     | 1.35      | SVM | 0.44                 | 0.72                            | 1.00        | 0.16       | 0.88                 | 0.43                | 0.65                      |
| MN2     | 1.28      | GB  | 0.47                 | 0.73                            | 1.00        | - 0.10     | 0.93                 | 0.47                | 0.18                      |
| MN3     | 1.316     | KNN | 0.37                 | 0.69                            | 1.00        | 0.36       | 0.88                 | 0.37                | 0.13                      |
| MN4     | 1.752     | RF  | 0.36                 | 0.68                            | 0.63        | 0.37       | 0.82                 | 0.45                | 0.43                      |
| MN5     | 1.35      | DT  | 0.30                 | 0.65                            | 0.22        | - 0.03     | 0.49                 | 0.34                | 0.29                      |

**Table S11.** Hyperparameters associated to models MN1-MN5. The list is reported as python dictionaries.

| # Model | Hyperparameters                                                                                                                                                   |
|---------|-------------------------------------------------------------------------------------------------------------------------------------------------------------------|
| MN1     | {'class_weight': None, 'C': 87.88, 'kernel': 'rbf', 'probability': True}                                                                                          |
| MN2     | {'n_estimators': 160, 'max_depth': 3, 'min_samples_leaf': 0.2, 'min_samples_split': 0.6, 'max_features': 'log2'}                                                  |
| MN3     | {'n_neighbors': 5, 'weights': 'distance', 'algorithm': 'auto', 'leaf_size': 25, 'metric': 'chebyshev', 'metric_params': None, 'p': 1}                             |
| MN4     | {'class_weight': 'balanced', 'n_estimators': 600, 'max_depth': 11, 'min_samples_split': 0.5, 'min_samples_leaf': 0.1}                                             |
| MN5     | {'class_weight': 'balanced', 'criterion': 'gini', 'splitter': 'best', 'max_depth': 13, 'min_samples_split': 1.0, 'min_samples_leaf': 0.1, 'max_features': 'sqrt'} |

#### 1.2. 1000 random iterations.

For the intermediate random search with 1000 iterations, the ML classifiers and the thresholds were selected on the basis of best 5 models (Tables S10 and Table S11). Here the random search with 1000 iterations was run using SVM, GB, KNN, and RF and the thresholds values were reduced to 1.28, 1.316, 1.35, 1.418, 1.532, 1.608 and 1.752.

**Table S12.** Coarse best models obtained for each classifier.

| # Model | Threshold | ML  | Average $MCC_{Pred}$ | Average Normalized $MCC_{Pred}$ | $MCC_{Fit}$ | $MCC_{CV}$ | Average $ACC_{Pred}$ | Average $F1_{Pred}$ | Average $ROC\_AUC_{Pred}$ |
|---------|-----------|-----|----------------------|---------------------------------|-------------|------------|----------------------|---------------------|---------------------------|
| MN6     | 1.418     | SVM | 0.49                 | 0.75                            | 0.86        | 0.14       | 0.88                 | 0.53                | 0.45                      |
| MN7     | 1.752     | GB  | 0.51                 | 0.75                            | 1.00        | 0.11       | 0.83                 | 0.56                | 0.28                      |
| MN8     | 1.316     | KNN | 0.37                 | 0.69                            | 1.00        | 0.36       | 0.88                 | 0.37                | 0.13                      |
| MN9     | 1.532     | RF  | 0.49                 | 0.74                            | 1.00        | 0.00       | 0.88                 | 0.5                 | 0.44                      |

**Table S13.** Hyperparameters associated to models **MN6-MN9**. The list is reported as python dictionaries.

| # Model | Hyperparameters                                                                                                                       |
|---------|---------------------------------------------------------------------------------------------------------------------------------------|
| MN6     | {'class_weight': None, 'C': 64.65, 'kernel': 'rbf', 'probability': True}                                                              |
| MN7     | {'n_estimators': 140, 'max_depth': 9, 'min_samples_leaf': 0.30, 'min_samples_split': 0.9, 'max_features': 'sqrt'}                     |
| MN8     | {'n_neighbors': 5, 'weights': 'distance', 'algorithm': 'auto', 'leaf_size': 25, 'metric': 'chebyshev', 'metric_params': None, 'p': 3} |
| MN9     | {'class_weight': 'balanced_subsample', 'n_estimators': 750, 'max_depth': 6, 'min_samples_split': 0.2, 'min_samples_leaf': 0.2}        |

1.3. 10000 random iterations.

For the random search with 10000 iterations, the ML classifiers and the thresholds were selected on the basis of best 5 models (Tables S12 and Table S13). Here the random search with 1000 iterations was run using SVM, GB, KNN, and RF and the thresholds values were reduced to 1.28, 1.316, 1.35, 1.418, 1.532, 1.608 and 1.752.

**Table S14.** Refined best models obtained for each classifier

| # Model | Threshold | ML  | Average<br>MCC <sub>Pred</sub> | Average<br>Normalized<br>MCC <sub>Pred</sub> | MCC <sub>Fit</sub> | MCC <sub>CV</sub> | Average<br>ACC <sub>Pred</sub> | Average<br>F1 <sub>Pred</sub> | Average<br>ROC_AUC <sub>Pred</sub> |
|---------|-----------|-----|--------------------------------|----------------------------------------------|--------------------|-------------------|--------------------------------|-------------------------------|------------------------------------|
| MN10    | 1.418     | SVM | 0.49                           | 0.75                                         | 0.86               | 0.14              | 0.88                           | 0.53                          | 0.65                               |
| MN11    | 1.35      | GB  | 0.60                           | 0.80                                         | 1.00               | 0.00              | 0.93                           | 0.6                           | 0.24                               |
| MN12    | 1.752     | KNN | 0.35                           | 0.67                                         | 0.29               | 0.06              | 0.77                           | 0.42                          | 0.33                               |
| MN13    | 1.752     | RF  | 0.62                           | 0.81                                         | 0.56               | 0.08              | 0.87                           | 0.63                          | 0.19                               |

**Table S15.** Hyperparameters associated to models **MN10-MN13**. The list is reported as python dictionaries.

| # Model | Hyperparameters                                                                                                                       |
|---------|---------------------------------------------------------------------------------------------------------------------------------------|
| MN10    | {'class_weight': None, 'C': 63.66, 'kernel': 'rbf', 'probability': True}                                                              |
| MN11    | {'n_estimators': 59, 'max_depth': 14, 'min_samples_leaf': 0.28, 'min_samples_split': 0.57, 'max_features': 'log2'}                    |
| MN12    | {'n_neighbors': 5, 'weights': 'uniform', 'algorithm': 'brute', 'leaf_size': 16, 'metric': 'minkowski', 'metric_params': None, 'p': 5} |
| MN13    | {'class_weight': 'balanced_subsample', 'n_estimators': 21, 'max_depth': 13, 'min_samples_split': 0.1, 'min_samples_leaf': 0.23}       |

1.4. 100000 random iterations.

For the random search with 10000 iterations, the ML classifiers and the thresholds were selected on the basis of models in Tables S14 and S15. Here the random search with 100000 iterations was run using SVM, GB, and RF and the thresholds values were reduced to 1.28 and 1.752.

**Table S16.** Refined best models obtained for each classifier

| # Model | Threshold | ML  | Average<br>MCC <sub>Pred</sub> | Average<br>Normalized<br>MCC <sub>Pred</sub> | MCC <sub>Fit</sub> | MCC <sub>CV</sub> | Average<br>ACC <sub>Pred</sub> | Average<br>F1 <sub>Pred</sub> | Average<br>ROC_AUC <sub>Pred</sub> |
|---------|-----------|-----|--------------------------------|----------------------------------------------|--------------------|-------------------|--------------------------------|-------------------------------|------------------------------------|
| MN14    | 1.28      | SVM | 0.45                           | 0.72                                         | 0.80               | - 0.08            | 0.78                           | 0.44                          | 0.33                               |
| MN15    | 1.752     | GB  | 0.61                           | 0.81                                         | 1.00               | 0.20              | 0.88                           | 0.6                           | 0.27                               |
| MN16    | 1.28      | RF  | 0.49                           | 0.75                                         | 0.56               | - 0.10            | 0.48                           | 0.20                          | 0.20                               |

**Table S17.** Hyperparameters associated to models MN14-MN16. The list is reported as python dictionaries.

| # Model | Hyperparameters                                                                                                                   |
|---------|-----------------------------------------------------------------------------------------------------------------------------------|
| MN14    | {'class_weight': 'balanced', 'C': 88.79, 'kernel': 'poly', 'probability': True}                                                   |
| MN15    | {'n_estimators': 134, 'max_depth': 11, 'min_samples_leaf': 0.2795918367346939, 'min_samples_split': 0.55, 'max_features': 'sqrt'} |
| MN16    | {'class_weight': 'balanced', 'n_estimators': 7, 'max_depth': 5, 'min_samples_split': 0.35, 'min_samples_leaf': 0.179}             |

## 2. DPPH

2.1. 100 random iterations.

During the random search with 100 iterations, the classifiers used were: SVM, GB, KNN, RF and DT with the threshold listed in Table S7.

**Table S18.** Coarse best models obtained for each classifier.

| # Model | Threshold | ML  | Average<br>MCC <sub>Pred</sub> | Average<br>Normalized<br>MCC <sub>Pred</sub> | MCC <sub>Fit</sub> | MCC <sub>CV</sub> | Average<br>ACC <sub>Pred</sub> | Average<br>F1 <sub>Pred</sub> | Average<br>ROC_AUC <sub>Pred</sub> |
|---------|-----------|-----|--------------------------------|----------------------------------------------|--------------------|-------------------|--------------------------------|-------------------------------|------------------------------------|
| DPPH1   | 0.63      | SVM | 0.75                           | 0.88                                         | 1.00               | 0.67              | 0.92                           | 0.80                          | 0.08                               |
| DPPH2   | 0.63      | GB  | 0.84                           | 0.92                                         | 1.00               | 0.35              | 0.95                           | 0.85                          | 0.06                               |
| DPPH3   | 0.63      | KNN | 0.64                           | 0.82                                         | 1.00               | 0.72              | 0.87                           | 0.71                          | 0.17                               |
| DPPH4   | 0.66      | RF  | 0.64                           | 0.82                                         | 0.72               | 0.44              | 0.87                           | 0.71                          | 0.14                               |
| DPPH5   | 1.092     | DT  | 0.50                           | 0.75                                         | 0.61               | 0.36              | 0.75                           | 0.62                          | 0.25                               |

**Table S19.** Hyperparameters associated to models DPPH1-DPPH5. The list is reported as python dictionaries.

| # Model | Hyperparameters                                                                                                                                             |
|---------|-------------------------------------------------------------------------------------------------------------------------------------------------------------|
| DPPH1   | {'class_weight': 'balanced', 'C': 34.34, 'kernel': 'rbf', 'probability': True}                                                                              |
| DPPH2   | {'n_estimators': 200, 'max_depth': 13, 'min_samples_leaf': 0.2, 'min_samples_split': 1.0, 'max_features': 'auto'}                                           |
| DPPH3   | {'n_neighbors': 5, 'weights': 'distance', 'algorithm': 'brute', 'leaf_size': 40, 'metric': 'manhattan', 'metric_params': None, 'p': 2}                      |
| DPPH4   | {'class_weight': 'balanced_subsample', 'n_estimators': 550, 'max_depth': 10, 'min_samples_split': 0.30, 'min_samples_leaf': 0.1}                            |
| DPPH5   | {'class_weight': None, 'criterion': 'entropy', 'splitter': 'best', 'max_depth': 7, 'min_samples_split': 0.9, 'min_samples_leaf': 0.2, 'max_features': None} |

2.2. 1000 random iterations.

For the intermediate random search with 1000 iterations, the ML classifiers and the thresholds were selected on the basis of best 5 models (Tables S10 and S11). Here the random search with 1000 iterations was run using SVM, GB, KNN, RF and DT and the thresholds values were reduced to 0.63, 0.66, 0.688, 0.768, 0.84 and 1.092.

**Table S20.** Coarse best models obtained for each classifier

| # Model | Threshold | ML  | Average<br>MCC <sub>Pred</sub> | Average<br>Normalized<br>MCC <sub>Pred</sub> | MCC <sub>Fit</sub> | MCC <sub>CV</sub> | Average<br>ACC <sub>Pred</sub> | Average<br>F1 <sub>Pred</sub> | Average<br>ROC_AUC <sub>Pred</sub> |
|---------|-----------|-----|--------------------------------|----------------------------------------------|--------------------|-------------------|--------------------------------|-------------------------------|------------------------------------|
| DPPH6   | 0.63      | SVM | 0.81                           | 0.90                                         | 0.90               | 0.79              | 0.93                           | 0.82                          | 0.13                               |
| DPPH7   | 0.63      | GB  | 0.84                           | 0.92                                         | 1.00               | 0.30              | 0.95                           | 0.85                          | 0.06                               |
| DPPH8   | 0.688     | KNN | 0.69                           | 0.84                                         | 1.00               | 0.48              | 0.90                           | 0.71                          | 0.06                               |
| DPPH9   | 0.66      | RF  | 0.75                           | 0.87                                         | 0.69               | 0.51              | 0.90                           | 0.79                          | 0.04                               |
| DPPH10  | 0.66      | DT  | 0.67                           | 0.83                                         | 0.57               | 0.51              | 0.88                           | 0.66                          | 0.17                               |

**Table S21.** Hyperparameters associated to models DPPH6-DPPH10. The list is reported as python dictionaries.

| # Model | Hyperparameters                                                                                                                                                |
|---------|----------------------------------------------------------------------------------------------------------------------------------------------------------------|
| DPPH6   | {'class_weight': 'balanced', 'C': 1.01, 'kernel': 'rbf', 'probability': True}                                                                                  |
| DPPH7   | {'n_estimators': 200, 'max_depth': 14, 'min_samples_leaf': 0.2, 'min_samples_split': 0.8, 'max_features': 'auto'}                                              |
| DPPH8   | {'n_neighbors': 5, 'weights': 'distance', 'algorithm': 'auto', 'leaf_size': 50, 'metric': 'chebyshev', 'metric_params': None, 'p': 3}                          |
| DPPH9   | {'class_weight': 'balanced', 'n_estimators': 600, 'max_depth': 14, 'min_samples_split': 0.4, 'min_samples_leaf': 0.30}                                         |
| DPPH10  | {'class_weight': None, 'criterion': 'entropy', 'splitter': 'best', 'max_depth': 11, 'min_samples_split': 0.4, 'min_samples_leaf': 0.1, 'max_features': 'auto'} |

### 2.3. 10000 random iterations.

For the random search with 10000 iterations, the ML classifiers and the thresholds were selected on the basis of best 5 models (Tables S12 and S13). Here the random search with 1000 iterations was run using SVM, GB and DT and the thresholds values were reduced to 0.63, 0.66 and 1.092.

**Table S22.** Refined best models obtained for each classifier.

| # Model | Threshold | ML  | Average<br>MCC <sub>Pred</sub> | Average<br>Normalized<br>MCC <sub>Pred</sub> | MCC <sub>Fit</sub> | MCC <sub>CV</sub> | Average<br>ACC <sub>Pred</sub> | Average<br>F1 <sub>Pred</sub> | Average<br>ROC_AUC <sub>Pred</sub> |
|---------|-----------|-----|--------------------------------|----------------------------------------------|--------------------|-------------------|--------------------------------|-------------------------------|------------------------------------|
| DPPH11  | 0.63      | SVM | 0.81                           | 0.90                                         | 0.90               | 0.79              | 0.93                           | 0.82                          | 0.13                               |
| DPPH12  | 0.66      | GB  | 0.86                           | 0.93                                         | 1.00               | 0.41              | 0.95                           | 0.88                          | 0.04                               |
| DPPH13  | 0.66      | DT  | 0.71                           | 0.85                                         | 0.72               | 0.63              | 0.82                           | 0.76                          | 0.14                               |

**Table S23.** Hyperparameters associated to models DPPH11-DPPH13. The list is reported as python dictionaries.

| # Model | Hyperparameters                                                                                                                                                    |
|---------|--------------------------------------------------------------------------------------------------------------------------------------------------------------------|
| DPPH11  | {'class_weight': 'balanced', 'C': 0.90, 'kernel': 'rbf', 'probability': True}                                                                                      |
| DPPH12  | {'n_estimators': 116, 'max_depth': 7, 'min_samples_leaf': 0.31, 'min_samples_split': 0.39, 'max_features': 'auto'}                                                 |
| DPPH13  | {'class_weight': 'balanced', 'criterion': 'gini', 'splitter': 'best', 'max_depth': 3, 'min_samples_split': 0.36, 'min_samples_leaf': 0.12, 'max_features': 'sqrt'} |

### 2.4. 100000 random iterations.

For the random search with 10000 iterations, the ML classifiers and the thresholds were selected on the basis of models in Tables S14 and S15. Here the random search with 100000 iterations was run using SVM, GB and DT and the thresholds values were reduced to 0.63, 0.66 and 1.092.

**Table S24.** Refined best models obtained for each classifier.

| # Model | Threshold | ML  | Average<br>MCC <sub>Pred</sub> | Average<br>Normalized<br>MCC <sub>Pred</sub> | MCC <sub>Fit</sub> | MCC <sub>CV</sub> | Average<br>ACC <sub>Pred</sub> | Average<br>F1 <sub>Pred</sub> | Average<br>ROC_AUC <sub>Pred</sub> |
|---------|-----------|-----|--------------------------------|----------------------------------------------|--------------------|-------------------|--------------------------------|-------------------------------|------------------------------------|
| DPPH14  | 0.63      | SVM | 0.81                           | 0.90                                         | 0.90               | 0.79              | 0.93                           | 0.82                          | 0.14                               |
| DPPH15  | 0.66      | GB  | 0.91                           | 0.95                                         | 1.00               | 0.27              | 0.97                           | 0.92                          | 0.05                               |
| DPPH16  | 0.66      | DT  | 0.76                           | 0.88                                         | 0.86               | 0.18              | 0.92                           | 0.76                          | 0.11                               |

**Table S25.** Hyperparameters associated to models DPPH14-DPPH16. The list is reported as python dictionaries.

| # Model | Hyperparameters                                                                                                                                                 |
|---------|-----------------------------------------------------------------------------------------------------------------------------------------------------------------|
| DPPH14  | {'class_weight': 'balanced', 'C': 0.70, 'kernel': 'rbf', 'probability': True}                                                                                   |
| DPPH15  | {'n_estimators': 114, 'max_depth': 10, 'min_samples_leaf': 0.32, 'min_samples_split': 0.31, 'max_features': 'log2'}                                             |
| DPPH16  | {'class_weight': None, 'criterion': 'entropy', 'splitter': 'best', 'max_depth': 12, 'min_samples_split': 0.1, 'min_samples_leaf': 0.13, 'max_features': 'log2'} |

### 3. LOO

#### 3.1. 100 random iterations.

During the random search with 100 iterations, the classifiers used were: SVM, GB, KNN, RF and DT with the threshold listed in Table S7.

**Table S26.** Coarse best models obtained for each classifier

| # Model | Threshold | ML  | Average<br>MCC <sub>Pred</sub> | Average<br>Normalized<br>MCC <sub>Pred</sub> | MCC <sub>Fit</sub> | MCC <sub>CV</sub> | Average<br>ACC <sub>Pred</sub> | Average<br>F1 <sub>Pred</sub> | Average<br>ROC_AUC <sub>Pred</sub> |
|---------|-----------|-----|--------------------------------|----------------------------------------------|--------------------|-------------------|--------------------------------|-------------------------------|------------------------------------|
| LOO1    | 0.19      | SVM | 0.95                           | 0.98                                         | 0.93               | 0.93              | 0.98                           | 0.96                          | 0.02                               |
| LOO2    | 0.19      | GB  | 0.93                           | 0.97                                         | 1.00               | 0.28              | 0.98                           | 0.93                          | 0.01                               |
| LOO3    | 0.346     | KNN | 0.76                           | 0.88                                         | 1.00               | 0.70              | 0.93                           | 0.76                          | 0.14                               |
| LOO4    | 0.346     | RF  | 0.65                           | 0.83                                         | 1.00               | 0.00              | 0.90                           | 0.67                          | 0.08                               |
| LOO5    | 0.73      | DT  | 0.61                           | 0.80                                         | 0.64               | 0.38              | 0.82                           | 0.68                          | 0.19                               |

**Table S27.** Hyperparameters associated to models LOO1-LOO5. The list is reported as python dictionaries.

| # Model | Hyperparameters                                                                                                                                             |
|---------|-------------------------------------------------------------------------------------------------------------------------------------------------------------|
| LOO1    | {'class_weight': None, 'C': 60.61, 'kernel': 'sigmoid', 'probability': True}                                                                                |
| LOO2    | {'n_estimators': 120, 'max_depth': 6, 'min_samples_leaf': 0.1, 'min_samples_split': 1.0, 'max_features': 'log2'}                                            |
| LOO3    | {'n_neighbors': 5, 'weights': 'distance', 'algorithm': 'auto', 'leaf_size': 50, 'metric': 'manhattan', 'metric_params': None, 'p': 4}                       |
| LOO4    | {'class_weight': 'balanced', 'n_estimators': 550, 'max_depth': 10, 'min_samples_split': 0.30, 'min_samples_leaf': 0.1}                                      |
| LOO5    | {'class_weight': None, 'criterion': 'entropy', 'splitter': 'best', 'max_depth': 7, 'min_samples_split': 0.9, 'min_samples_leaf': 0.2, 'max_features': None} |

### 3.2. 1000 random iterations.

For the intermediate random search with 1000 iterations, the ML classifiers and the thresholds were selected on the basis of best 5 models (Tables S10 and S11). Here the random search with 1000 iterations was run using SVM, GB, KNN, RF and DT and the thresholds values were reduced to 0.18, 0.19, 0.231, 0.285, 0.346, 0.576, 0.618, 0.694, 0.73 and 0.9.

**Table S28.** Coarse best models obtained for each classifier.

| # Model | Threshold | ML  | Average<br>MCC <sub>Pred</sub> | Average<br>Normalized<br>MCC <sub>Pred</sub> | MCC <sub>Fit</sub> | MCC <sub>CV</sub> | Average<br>ACC <sub>Pred</sub> | Average<br>F1 <sub>Pred</sub> | Average<br>ROC_AUC <sub>Pred</sub> |
|---------|-----------|-----|--------------------------------|----------------------------------------------|--------------------|-------------------|--------------------------------|-------------------------------|------------------------------------|
| LOO6    | 0.19      | SVM | 0.95                           | 0.98                                         | 0.93               | 0.88              | 0.98                           | 0.96                          | 0.02                               |
| LOO7    | 0.19      | GB  | 1.00                           | 1.00                                         | 1.00               | 0.36              | 1.0                            | 1.0                           | 0.0                                |
| LOO8    | 0.73      | KNN | 0.77                           | 0.88                                         | 1.00               | 0.74              | 0.92                           | 0.81                          | 0.15                               |
| LOO9    | 0.19      | RF  | 0.78                           | 0.89                                         | 0.65               | 0.60              | 0.9                            | 0.79                          | 0.06                               |
| LOO10   | 0.19      | DT  | 0.80                           | 0.90                                         | 0.71               | 0.45              | 0.9                            | 0.8                           | 0.07                               |

**Table S29.** Hyperparameters associated to models LOO6-LOO10. The list is reported as python dictionaries.

| #<br>Model | Hyperparameters                                                                                                                                                 |
|------------|-----------------------------------------------------------------------------------------------------------------------------------------------------------------|
| LOO6       | {'class_weight': 'balanced', 'C': 97.98, 'kernel': 'sigmoid', 'probability': True}                                                                              |
| LOO7       | {'n_estimators': 120, 'max_depth': 9, 'min_samples_leaf': 0.1, 'min_samples_split': 0.4, 'max_features': 'log2'}                                                |
| LOO8       | {'n_neighbors': 5, 'weights': 'distance', 'algorithm': 'auto', 'leaf_size': 50, 'metric': 'chebyshev', 'metric_params': None, 'p': 3}                           |
| LOO9       | {'class_weight': 'balanced_subsample', 'n_estimators': 850, 'max_depth': 13, 'min_samples_split': 0.2, 'min_samples_leaf': 0.2}                                 |
| LOO10      | {'class_weight': 'balanced', 'criterion': 'gini', 'splitter': 'best', 'max_depth': 3, 'min_samples_split': 0.30, 'min_samples_leaf': 0.1, 'max_features': None} |

### 3.3. 10000 random iterations.

For the random search with 10000 iterations, the ML classifiers and the thresholds were selected on the basis of best 5 models (Tables S12 and S13). Here the random search with 1000 iterations was run using SVM, GB, RF and DT and the thresholds values were reduced to 0.18, 0.19, 0.231, 0.285, 0.346, 0.576, 0.694 and 0.9.

**Table S30.** Refined best models obtained for each classifier

| # Model | Threshold | ML  | Average<br>MCC <sub>Pred</sub> | Average<br>Normalized<br>MCC <sub>Pred</sub> | MCC <sub>Fit</sub> | MCC <sub>CV</sub> | Average<br>ACC <sub>Pred</sub> | Average<br>F1 <sub>Pred</sub> | Average<br>ROC_AUC <sub>Pred</sub> |
|---------|-----------|-----|--------------------------------|----------------------------------------------|--------------------|-------------------|--------------------------------|-------------------------------|------------------------------------|
| LOO11   | 0.19      | SVM | 0.95                           | 0.98                                         | 0.93               | 0.80              | 0.98                           | 0.96                          | 0.02                               |
| LOO12   | 0.19      | GB  | 1.0                            | 1.0                                          | 1.0                | 0.75              | 1.0                            | 1.0                           | 0.0                                |
| LOO13   | 0.19      | RF  | 0.80                           | 0.90                                         | 0.78               | 0.36              | 0.95                           | 0.8                           | 0.04                               |
| LOO14   | 0.19      | DT  | 0.83                           | 0.91                                         | 0.71               | 0.45              | 0.92                           | 0.83                          | 0.05                               |

**Table S31.** Hyperparameters associated to models LOO10-LOO14. The list is reported as python dictionaries.

| #<br>Model | Hyperparameters                                                                                                                                                 |
|------------|-----------------------------------------------------------------------------------------------------------------------------------------------------------------|
| LOO11      | {'class_weight': None, 'C': 75.78, 'kernel': 'sigmoid', 'probability': True}                                                                                    |
| LOO12      | {'n_estimators': 190, 'max_depth': 3, 'min_samples_leaf': 0.26, 'min_samples_split': 0.22, 'max_features': 'sqrt'}                                              |
| LOO13      | {'class_weight': 'balanced', 'n_estimators': 81, 'max_depth': 9, 'min_samples_split': 0.19, 'min_samples_leaf': 0.21}                                           |
| LOO14      | {'class_weight': 'balanced', 'criterion': 'gini', 'splitter': 'best', 'max_depth': 7, 'min_samples_split': 0.2, 'min_samples_leaf': 0.11, 'max_features': None} |

### 3.4. 100000 random iterations

For the random search with 10000 iterations, the ML classifiers and the thresholds were selected on the basis of models in Tables S14 and S15. Here the random search with 100000 iterations was run using SVM, GB and RF and the thresholds values were reduced to 0.18, 0.19, 0.231 and 0.576.

**Table S32.** Refined best models obtained for each classifier

| # Model | Threshold | ML  | Average<br>MCC <sub>Pred</sub> | Average<br>Normalized<br>MCC <sub>Pred</sub> | MCC <sub>Fit</sub> | MCC <sub>CV</sub> | Average<br>ACC <sub>Pred</sub> | Average<br>F1 <sub>Pred</sub> | Average<br>ROC_AUC <sub>Pred</sub> |
|---------|-----------|-----|--------------------------------|----------------------------------------------|--------------------|-------------------|--------------------------------|-------------------------------|------------------------------------|
| LOO15   | 0.19      | SVM | 0.95                           | 0.98                                         | 0.93               | 0.82              | 0.98                           | 0.96                          | 0.02                               |
| LOO16   | 0.19      | GB  | 1.0                            | 1.0                                          | 1.0                | 0.69              | 1.0                            | 1.0                           | 0.0                                |
| LOO17   | 0.19      | RF  | 0.82                           | 0.91                                         | 0.93               | 0.20              | 0.95                           | 0.83                          | 0.01                               |

**Table S33.** Hyperparameters associated to models LOO15-LOO17. The list is reported as python dictionaries.

| # Model | Hyperparameters                                                                                                                  |
|---------|----------------------------------------------------------------------------------------------------------------------------------|
| LOO15   | {'class_weight': None, 'C': 35.64, 'kernel': 'sigmoid', 'probability': True}                                                     |
| LOO16   | {'n_estimators': 111, 'max_depth': 12, 'min_samples_leaf': 0.13, 'min_samples_split': 0.12, 'max_features': None}                |
| LOO17   | {'class_weight': 'balanced_subsample', 'n_estimators': 926, 'max_depth': 8, 'min_samples_split': 0.72, 'min_samples_leaf': 0.22} |

## 4. ABTS<sup>+</sup>

### 4.1. 100 random iterations.

During the random search with 100 iterations, the classifiers used were: SVM, GB, KNN, RF and DT with the threshold listed in Table S7.

**Table S34.** Coarse best models obtained for each classifier

| # Model | Threshold | ML  | Average<br>MCC <sub>Pred</sub> | Average<br>Normalized<br>MCC <sub>Pred</sub> | MCC <sub>Fit</sub> | MCC <sub>CV</sub> | Average<br>ACC <sub>Pred</sub> | Average<br>F1 <sub>Pred</sub> | Average<br>ROC_AUC <sub>Pred</sub> |
|---------|-----------|-----|--------------------------------|----------------------------------------------|--------------------|-------------------|--------------------------------|-------------------------------|------------------------------------|
| ABTS1   | 0.179     | SVM | 0.94                           | 0.97                                         | 1.00               | 0.64              | 0.98                           | 0.93                          | 0.00                               |
| ABTS2   | 0.179     | GB  | 0.89                           | 0.94                                         | 1.00               | 0.28              | 0.97                           | 0.89                          | 0.02                               |
| ABTS3   | 0.097     | KNN | 0.87                           | 0.93                                         | 1.00               | 0.59              | 0.97                           | 0.87                          | 0.03                               |
| ABTS4   | 0.358     | RF  | 0.71                           | 0.85                                         | 0.86               | 0.48              | 0.92                           | 0.70                          | 0.03                               |
| ABTS5   | 1.072     | DT  | 0.61                           | 0.81                                         | 0.61               | 0.51              | 0.85                           | 0.61                          | 0.27                               |

**Table S35.** Hyperparameters associated to models ABTS1-ABTS5 The list is reported as python dictionaries.

| # Model | Hyperparameters                                                                                                                                             |
|---------|-------------------------------------------------------------------------------------------------------------------------------------------------------------|
| ABTS1   | {'class_weight': 'balanced', 'C': 34.34, 'kernel': 'rbf', 'probability': True}                                                                              |
| ABTS2   | {'n_estimators': 150, 'max_depth': 12, 'min_samples_leaf': 0.30, 'min_samples_split': 0.2, 'max_features': 'sqrt'}                                          |
| ABTS3   | {'n_neighbors': 10, 'weights': 'distance', 'algorithm': 'brute', 'leaf_size': 20, 'metric': 'manhattan', 'metric_params': None, 'p': 1}                     |
| ABTS4   | {'class_weight': 'balanced', 'n_estimators': 450, 'max_depth': 11, 'min_samples_split': 0.5, 'min_samples_leaf': 0.1}                                       |
| ABTS5   | {'class_weight': None, 'criterion': 'entropy', 'splitter': 'best', 'max_depth': 7, 'min_samples_split': 0.2, 'min_samples_leaf': 0.1, 'max_features': None} |

#### 4.2. 1000 random iterations.

For the intermediate random search with 1000 iterations, the ML classifiers and the thresholds were selected on the basis of best 5 models (Tables S10 and S11). Here the random search with 1000 iterations was run using : SVM, GB, KNN, RF and DT and the thresholds values were reduced to 0.089, 0.09, 0.097, 0.179, 0.314, 0.358, 0.494, 0.656, 0.68, 0.792 and 1.072.

**Table S36.** Coarse best models obtained for each classifier

| # Model | Threshold | ML  | Average<br>MCC <sub>Pred</sub> | Average<br>Normalized<br>MCC <sub>Pred</sub> | MCC <sub>Fit</sub> | MCC <sub>CV</sub> | Average<br>ACC <sub>Pred</sub> | Average<br>F1 <sub>Pred</sub> | Average<br>ROC_AUC <sub>Pred</sub> |
|---------|-----------|-----|--------------------------------|----------------------------------------------|--------------------|-------------------|--------------------------------|-------------------------------|------------------------------------|
| ABTS6   | 0.179     | SVM | 0.95                           | 0.98                                         | 1.00               | 0.72              | 0.98                           | 0.96                          | 0.00                               |
| ABTS7   | 0.179     | GB  | 0.93                           | 0.96                                         | 1.00               | 0.00              | 0.98                           | 0.93                          | 0.01                               |
| ABTS8   | 0.097     | KNN | 0.87                           | 0.93                                         | 1.00               | 0.68              | 0.97                           | 0.87                          | 0.03                               |
| ABTS9   | 0.097     | RF  | 0.83                           | 0.91                                         | 0.79               | 0.62              | 0.95                           | 0.83                          | 0.05                               |
| ABTS10  | 0.179     | DT  | 0.80                           | 0.90                                         | 0.67               | 0.48              | 0.92                           | 0.81                          | 0.05                               |

**Table S37.** Hyperparameters associated to models ABTS6-ABTS10. The list is reported as python dictionaries.

| # Model | Hyperparameters                                                                                                                                                   |
|---------|-------------------------------------------------------------------------------------------------------------------------------------------------------------------|
| ABTS6   | {'class_weight': None, 'C': 75.76, 'kernel': 'sigmoid', 'probability': True}                                                                                      |
| ABTS7   | {'n_estimators': 120, 'max_depth': 14, 'min_samples_leaf': 0.1, 'min_samples_split': 0.8, 'max_features': 'log2'}                                                 |
| ABTS8   | {'n_neighbors': 10, 'weights': 'distance', 'algorithm': 'brute', 'leaf_size': 50, 'metric': 'minkowski', 'metric_params': None, 'p': 1}                           |
| ABTS9   | {'class_weight': 'balanced', 'n_estimators': 700, 'max_depth': 14, 'min_samples_split': 0.5, 'min_samples_leaf': 0.2}                                             |
| ABTS10  | {'class_weight': 'balanced', 'criterion': 'gini', 'splitter': 'best', 'max_depth': 4, 'min_samples_split': 0.30, 'min_samples_leaf': 0.1, 'max_features': 'sqrt'} |

#### 4.3. 10000 random iterations.

For the random search with 10000 iterations, the ML classifiers and the thresholds were selected on the basis of best 5 models (Tables S12 and S13). Here the random search with 1000 iterations was run using SVM, GB, KNN and DT and the thresholds values were reduced to 0.09, 0.097 and 0.179.

**Table S38.** Refined best models obtained for each classifier.

| # Model | Threshold | ML  | Average<br>MCC <sub>Pred</sub> | Average<br>Normalized<br>MCC <sub>Pred</sub> | MCC <sub>Fit</sub> | MCC <sub>CV</sub> | Average<br>ACC <sub>Pred</sub> | Average<br>F1 <sub>Pred</sub> | Average<br>ROC_AUC <sub>Pred</sub> |
|---------|-----------|-----|--------------------------------|----------------------------------------------|--------------------|-------------------|--------------------------------|-------------------------------|------------------------------------|
| ABTS11  | 0.179     | SVM | 0.95                           | 0.98                                         | 1.00               | 0.64              | 0.98                           | 0.96                          | 0.00                               |
| ABTS12  | 0.097     | GB  | 1.0                            | 1.0                                          | 1.00               | 0.71              | 1.0                            | 1.0                           | 0.0                                |
| ABTS13  | 0.097     | KNN | 0.87                           | 0.93                                         | 1.00               | 0.52              | 0.97                           | 0.87                          | 0.02                               |
| ABTS14  | 0.097     | RF  | 0.89                           | 0.94                                         | 0.70               | 0.62              | 0.97                           | 0.89                          | 0.02                               |

**Table S39.** Hyperparameters associated to models ABTS11-ABTS14. The list is reported as python dictionaries.

| # Model | Hyperparameters                                                                                                                          |
|---------|------------------------------------------------------------------------------------------------------------------------------------------|
| ABTS11  | {'class_weight': None, 'C': 35.14, 'kernel': 'sigmoid', 'probability': True}                                                             |
| ABTS12  | {'n_estimators': 192, 'max_depth': 3, 'min_samples_leaf': 0.21, 'min_samples_split': 0.28, 'max_features': 'log2'}                       |
| ABTS13  | {'n_neighbors': 8, 'weights': 'distance', 'algorithm': 'kd_tree', 'leaf_size': 11, 'metric': 'minkowski', 'metric_params': None, 'p': 5} |
| ABTS14  | {'class_weight': 'balanced', 'n_estimators': 571, 'max_depth': 6, 'min_samples_split': 0.62, 'min_samples_leaf': 0.22}                   |

4.4. 100000 random iterations.

For the random search with 10000 iterations, the ML classifiers and the thresholds were selected on the basis of models in Tables S14 and S15. Here the random search with 100000 iterations was run using SVM, GB and KNN and the thresholds values were reduced to 0.09, 0.097 and 0.179.

**Table S40.** Refined best models obtained for each classifier.

| # Model | Threshold | ML  | Average<br>MCC <sub>Pred</sub> | Average<br>Normalized<br>MCC <sub>Pred</sub> | MCC <sub>Fit</sub> | MCC <sub>CV</sub> | Average<br>ACC <sub>Pred</sub> | Average<br>F1 <sub>Pred</sub> | Average<br>ROC_AUC <sub>Pred</sub> |
|---------|-----------|-----|--------------------------------|----------------------------------------------|--------------------|-------------------|--------------------------------|-------------------------------|------------------------------------|
| ABTS15  | 0.179     | SVM | 0.95                           | 0.98                                         | 1.00               | 0.64              | 0.98                           | 0.96                          | 0.00                               |
| ABTS16  | 0.097     | GB  | 1.00                           | 1.00                                         | 1.00               | 0.85              | 1.0                            | 1.00                          | 0.00                               |
| ABTS17  | 0.097     | KNN | 0.87                           | 0.93                                         | 1.00               | 0.59              | 0.97                           | 0.87                          | 0.03                               |

**Table S41.** Hyperparameters associated to models ABTS15-ABTS17. The list is reported as python dictionaries.

| # Model | Hyperparameters                                                                                                                          |
|---------|------------------------------------------------------------------------------------------------------------------------------------------|
| ABTS15  | {'class_weight': None, 'C': 36.34, 'kernel': 'sigmoid', 'probability': True}                                                             |
| ABTS16  | {'n_estimators': 154, 'max_depth': 3, 'min_samples_leaf': 0.13, 'min_samples_split': 0.32, 'max_features': 'auto'}                       |
| ABTS17  | {'n_neighbors': 8, 'weights': 'distance', 'algorithm': 'kd_tree', 'leaf_size': 22, 'metric': 'manhattan', 'metric_params': None, 'p': 3} |

## 5. OH

### 5.1. 100 random iterations

During the random search with 100 iterations, the classifiers used were: SVM, GB, KNN, RF and DT with the threshold listed in Table S7.

**Table S42.** Coarse best models obtained for each classifier.

| # Model | Threshold | ML  | Average<br>MCC <sub>Pred</sub> | Average<br>Normalized<br>MCC <sub>Pred</sub> | MCC <sub>Fit</sub> | MCC <sub>CV</sub> | Average<br>ACC <sub>Pred</sub> | Average<br>F1 <sub>Pred</sub> | Average<br>ROC_AUC <sub>Pred</sub> |
|---------|-----------|-----|--------------------------------|----------------------------------------------|--------------------|-------------------|--------------------------------|-------------------------------|------------------------------------|
| OH1     | 0.16      | SVM | 0.89                           | 0.94                                         | 0.87               | 0.74              | 0.97                           | 0.89                          | 0.01                               |
| OH2     | 0.286     | GB  | 0.82                           | 0.91                                         | 1.00               | 0.37              | 0.95                           | 0.83                          | 0.08                               |
| OH3     | 0.16      | KNN | 0.70                           | 0.85                                         | 1.00               | 0.61              | 0.92                           | 0.73                          | 0.08                               |
| OH4     | 0.286     | RF  | 0.78                           | 0.89                                         | 1.00               | 0.15              | 0.93                           | 0.79                          | 0.08                               |
| OH5     | 0.16      | DT  | 0.66                           | 0.83                                         | 0.48               | 0.39              | 0.83                           | 0.68                          | 0.10                               |

**Table S43.** Hyperparameters associated to models OH1-OH5. The list is reported as python dictionaries.

| # Model | Hyperparameters                                                                                                                                                 |
|---------|-----------------------------------------------------------------------------------------------------------------------------------------------------------------|
| OH1     | {'class_weight': 'balanced', 'C': 17.17, 'kernel': 'sigmoid', 'probability': True}                                                                              |
| OH2     | {'n_estimators': 120, 'max_depth': 9, 'min_samples_leaf': 0.2, 'min_samples_split': 0.1, 'max_features': 'sqrt'}                                                |
| OH3     | {'n_neighbors': 5, 'weights': 'distance', 'algorithm': 'kd_tree', 'leaf_size': 30, 'metric': 'minkowski', 'metric_params': None, 'p': 5}                        |
| OH4     | {'class_weight': 'balanced_subsample', 'n_estimators': 1050, 'max_depth': 10, 'min_samples_split': 0.4, 'min_samples_leaf': 0.1}                                |
| OH5     | {'class_weight': 'balanced', 'criterion': 'gini', 'splitter': 'best', 'max_depth': 8, 'min_samples_split': 0.70, 'min_samples_leaf': 0.4, 'max_features': None} |

### 5.2. 1000 random iterations.

For the intermediate random search with 1000 iterations, the ML classifiers and the thresholds were selected on the basis of best 5 models (Tables S10 and S11). Here the random search with 1000 iterations was run using SVM, GB, KNN, RF and DT and the thresholds values were reduced to 0.098, 0.111, 0.16, 0.25, 0.286, 0.378, 0.504, 0.568, 0.664 and 0.876.

**Table S44.** Coarse best models obtained for each classifier.

| # Model | Threshold | ML  | Average<br>MCC <sub>Pred</sub> | Average<br>Normalized<br>MCC <sub>Pred</sub> | MCC <sub>Fit</sub> | MCC <sub>CV</sub> | Average<br>ACC <sub>Pred</sub> | Average<br>F1 <sub>Pred</sub> | Average<br>ROC_AUC <sub>Pred</sub> |
|---------|-----------|-----|--------------------------------|----------------------------------------------|--------------------|-------------------|--------------------------------|-------------------------------|------------------------------------|
| OH6     | 0.16      | SVM | 0.89                           | 0.94                                         | 0.89               | 0.74              | 0.97                           | 0.89                          | 0.01                               |
| OH7     | 0.111     | GB  | 0.93                           | 0.97                                         | 1.00               | 0.40              | 0.98                           | 0.93                          | 0.09                               |
| OH8     | 0.25      | KNN | 0.75                           | 0.88                                         | 1.00               | 0.60              | 0.95                           | 0.76                          | 0.1                                |
| OH9     | 0.111     | RF  | 0.87                           | 0.93                                         | 0.92               | 0.57              | 0.97                           | 0.87                          | 0.12                               |
| OH10    | 0.286     | DT  | 0.89                           | 0.94                                         | 0.72               | 0.54              | 0.95                           | 0.90                          | 0.03                               |

**Table S45.** Hyperparameters associated to models OH6-OH10. The list is reported as python dictionaries.

| # Model | Hyperparameters                                                                                                                                                  |
|---------|------------------------------------------------------------------------------------------------------------------------------------------------------------------|
| OH6     | {'class_weight': 'balanced', 'C': 18.18, 'kernel': 'sigmoid', 'probability': True}                                                                               |
| OH7     | {'n_estimators': 120, 'max_depth': 6, 'min_samples_leaf': 0.1, 'min_samples_split': 0.8, 'max_features': 'sqrt'}                                                 |
| OH8     | {'n_neighbors': 5, 'weights': 'distance', 'algorithm': 'ball_tree', 'leaf_size': 25, 'metric': 'minkowski', 'metric_params': None, 'p': 2}                       |
| OH9     | {'class_weight': 'balanced_subsample', 'n_estimators': 1000, 'max_depth': 5, 'min_samples_split': 0.4, 'min_samples_leaf': 0.1}                                  |
| OH10    | {'class_weight': 'balanced', 'criterion': 'gini', 'splitter': 'best', 'max_depth': 4, 'min_samples_split': 0.1, 'min_samples_leaf': 0.1, 'max_features': 'sqrt'} |

### 5.3. 10000 random iterations.

For the random search with 10000 iterations, the ML classifiers and the thresholds were selected on the basis of best 5 models (Tables S12 and S13). Here the random search with 1000 iterations was run using SVM, GB, RF and DT and the thresholds values were reduced to 0.098, 0.111, 0.286 and 0.568.

**Table S46.** Refined best models obtained for each classifier.

| # Model | Threshold | ML  | Average<br>MCC <sub>Pred</sub> | Average<br>Normalized<br>MCC <sub>Pred</sub> | MCC <sub>Fit</sub> | MCC <sub>CV</sub> | Average<br>ACC <sub>Pred</sub> | Average<br>F1 <sub>Pred</sub> | Average<br>ROC_AUC <sub>Pred</sub> |
|---------|-----------|-----|--------------------------------|----------------------------------------------|--------------------|-------------------|--------------------------------|-------------------------------|------------------------------------|
| OH11    | 0.286     | SVM | 0.89                           | 0.94                                         | 1.00               | 0.71              | 0.97                           | 0.89                          | 0.1                                |
| OH12    | 0.111     | GB  | 0.93                           | 0.97                                         | 1.00               | 0.73              | 0.98                           | 0.93                          | 0.09                               |
| OH13    | 0.111     | RF  | 0.87                           | 0.93                                         | 0.92               | 0.57              | 0.97                           | 0.87                          | 0.13                               |
| OH14    | 0.111     | DT  | 0.79                           | 0.90                                         | 0.73               | 0.57              | 0.90                           | 0.79                          | 0.09                               |

**Table S47.** Hyperparameters associated to models OH11-OH14. The list is reported as python dictionaries.

| # Model | Hyperparameters                                                                                                                                                 |
|---------|-----------------------------------------------------------------------------------------------------------------------------------------------------------------|
| OH11    | {'class_weight': None, 'C': 78.18, 'kernel': 'linear', 'probability': True}                                                                                     |
| OH12    | {'n_estimators': 111, 'max_depth': 7, 'min_samples_leaf': 0.12, 'min_samples_split': 0.27, 'max_features': 'log2'}                                              |
| OH13    | {'class_weight': 'balanced_subsample', 'n_estimators': 921, 'max_depth': 14, 'min_samples_split': 0.58, 'min_samples_leaf': 0.12}                               |
| OH14    | {'class_weight': 'balanced', 'criterion': 'gini', 'splitter': 'best', 'max_depth': 7, 'min_samples_split': 0.2, 'min_samples_leaf': 0.11, 'max_features': None} |

#### 5.4. 100000 random iterations

For the random search with 10000 iterations, the ML classifiers and the thresholds were selected on the basis of models in Tables S14 and S15. Here the random search with 100000 iterations was run using SVM, GB, and RF and the thresholds values were reduced to 1.28 and 1.752.

**Table S48.** Refined best models obtained for each classifier

| # Model | Threshold | ML | Average<br>MCC <sub>Pred</sub> | Average<br>Normalized<br>MCC <sub>Pred</sub> | MCC <sub>Fit</sub> | MCC <sub>CV</sub> | Average<br>ACC <sub>Pred</sub> | Average<br>F1 <sub>Pred</sub> | Average<br>ROC_AUC <sub>Pred</sub> |
|---------|-----------|----|--------------------------------|----------------------------------------------|--------------------|-------------------|--------------------------------|-------------------------------|------------------------------------|
| OH15    | 0.111     | GB | 0.93                           | 0.97                                         | 1.00               | 0.43              | 0.98                           | 0.93                          | 0.08                               |
| OH16    | 0.111     | RF | 0.89                           | 0.94                                         | 0.72               | 0.64              | 0.97                           | 0.89                          | 0.07                               |

**Table S49.** Hyperparameters associated to models OH15-OH16. The list is reported as python dictionaries.

| # Model | Hyperparameters                                                                                                      |
|---------|----------------------------------------------------------------------------------------------------------------------|
| OH15    | {'n_estimators': 109, 'max_depth': 14, 'min_samples_leaf': 0.12, 'min_samples_split': 0.92, 'max_features': 'sqrt'}  |
| OH16    | {'class_weight': 'balanced', 'n_estimators': 45, 'max_depth': 5, 'min_samples_split': 0.27, 'min_samples_leaf': 0.1} |

#### 6. ROO-RBD<sub>50s</sub>

##### 6.1. 100 random iterations.

During the random search with 100 iterations, the classifiers used were: SVM, GB, KNN, RF and DT with the threshold listed in Table S7.

**Table S50.** Coarse best models obtained for each classifier.

| # Model | Threshold | ML  | Average<br>MCC <sub>Pred</sub> | Average<br>Normalized<br>MCC <sub>Pred</sub> | MCC <sub>Fit</sub> | MCC <sub>CV</sub> | Average<br>ACC <sub>Pred</sub> | Average<br>F1 <sub>Pred</sub> | Average<br>ROC_AUC <sub>Pred</sub> |
|---------|-----------|-----|--------------------------------|----------------------------------------------|--------------------|-------------------|--------------------------------|-------------------------------|------------------------------------|
| ROO1    | 164.548   | SVM | 0.58                           | 0.79                                         | 1.00               | 0.16              | 0.82                           | 0.67                          | 0.25                               |
| ROO2    | 149.372   | GB  | 0.48                           | 0.74                                         | 1.00               | 0.24              | 0.78                           | 0.63                          | 0.26                               |
| ROO3    | 204.402   | KNN | 0.41                           | 0.70                                         | 1.00               | 0.28              | 0.69                           | 0.62                          | 0.29                               |
| ROO4    | 172.46    | RF  | 0.44                           | 0.72                                         | 0.43               | 0.10              | 0.75                           | 0.55                          | 0.34                               |
| ROO5    | 250.942   | DT  | 0.42                           | 0.71                                         | 0.48               | 0.18              | 0.70                           | 0.67                          | 0.30                               |

**Table S51.** Hyperparameters associated to models ROO1-ROO5. The list is reported as python dictionaries.

| # Model | Hyperparameters                                                                                                                                           |
|---------|-----------------------------------------------------------------------------------------------------------------------------------------------------------|
| ROO1    | {'class_weight': None, 'C': 95.96, 'kernel': 'linear', 'probability': True}                                                                               |
| ROO2    | {'n_estimators': 140, 'max_depth': 10, 'min_samples_leaf': 0.30, 'min_samples_split': 0.1, 'max_features': 'auto'}                                        |
| ROO3    | {'n_neighbors': 5, 'weights': 'distance', 'algorithm': 'brute', 'leaf_size': 25, 'metric': 'euclidean', 'metric_params': None, 'p': 2}                    |
| ROO4    | {'class_weight': 'balanced', 'n_estimators': 450, 'max_depth': 4, 'min_samples_split': 0.30, 'min_samples_leaf': 0.30}                                    |
| ROO5    | {'class_weight': None, 'criterion': 'gini', 'splitter': 'best', 'max_depth': 13, 'min_samples_split': 0.1, 'min_samples_leaf': 0.4, 'max_features': None} |

## 6.2. 1000 random iterations.

For the intermediate random search with 1000 iterations, the ML classifiers and the thresholds were selected on the basis of best 5 models (Tables S10 and S11). Here the random search with 1000 iterations was run using SVM, GB, KNN and RF and the thresholds values were reduced to 113.05, 121.264, 128.934, 138.086, 140.312, 149.372, 159.59, 164.548, 197.46, 197.55, 204.402, 209.534, 215.9 and 250.942.

**Table S52.** Coarse best models obtained for each classifier.

| # Model | Threshold | ML  | Average<br>MCC <sub>Pred</sub> | Average<br>Normalized<br>MCC <sub>Pred</sub> | MCC <sub>Fit</sub> | MCC <sub>CV</sub> | Average<br>ACC <sub>Pred</sub> | Average<br>F1 <sub>Pred</sub> | Average<br>ROC_AUC <sub>Pred</sub> |
|---------|-----------|-----|--------------------------------|----------------------------------------------|--------------------|-------------------|--------------------------------|-------------------------------|------------------------------------|
| ROO6    | 164.548   | SVM | 0.58                           | 0.79                                         | 1.00               | 0.16              | 0.82                           | 0.67                          | 0.25                               |
| ROO7    | 204.402   | GB  | 0.49                           | 0.75                                         | 1.00               | 0.31              | 0.74                           | 0.74                          | 0.26                               |
| ROO8    | 204.402   | KNN | 0.41                           | 0.70                                         | 1.00               | 0.28              | 0.69                           | 0.62                          | 0.29                               |
| ROO9    | 197.55    | RF  | 0.53                           | 0.77                                         | 0.83               | 0.11              | 0.77                           | 0.66                          | 0.23                               |

**Table S53.** Hyperparameters associated to models ROO6-ROO9. The list is reported as python dictionaries.

| # Model | Hyperparameters                                                                                                                          |
|---------|------------------------------------------------------------------------------------------------------------------------------------------|
| ROO6    | {'class_weight': None, 'C': 96.97, 'kernel': 'linear', 'probability': True}                                                              |
| ROO7    | {'n_estimators': 100, 'max_depth': 10, 'min_samples_leaf': 0.2, 'min_samples_split': 0.30, 'max_features': 'sqrt'}                       |
| ROO8    | {'n_neighbors': 5, 'weights': 'distance', 'algorithm': 'kd_tree', 'leaf_size': 50, 'metric': 'euclidean', 'metric_params': None, 'p': 5} |
| ROO9    | {'class_weight': 'balanced_subsample', 'n_estimators': 150, 'max_depth': 4, 'min_samples_split': 0.6, 'min_samples_leaf': 0.1}           |

## 6.3. 10000 random iterations.

For the random search with 10000 iterations, the ML classifiers and the thresholds were selected on the basis of best 5 models (Tables S12 and S13). Here the random search with 1000 iterations was run using SVM, GB, KNN and RF and the thresholds values were reduced to 113.05, 128.934, 164.548, 197.55, 209.534 and 215.9.

**Table S54.** Refined best models obtained for each classifier

| # Model | Threshold | ML  | Average<br>MCC <sub>Pred</sub> | Average<br>Normalized<br>MCC <sub>Pred</sub> | MCC <sub>Fit</sub> | MCC <sub>CV</sub> | Average<br>ACC <sub>Pred</sub> | Average<br>F1 <sub>Pred</sub> | Average<br>ROC_AUC <sub>Pred</sub> |
|---------|-----------|-----|--------------------------------|----------------------------------------------|--------------------|-------------------|--------------------------------|-------------------------------|------------------------------------|
| ROO10   | 164.548   | SVM | 0.58                           | 0.79                                         | 1.00               | 0.16              | 0.82                           | 0.67                          | 0.25                               |
| ROO11   | 197.55    | GB  | 0.54                           | 0.77                                         | 0.97               | 0.11              | 0.75                           | 0.70                          | 0.17                               |
| ROO12   | 209.534   | KNN | 0.40                           | 0.70                                         | 1.00               | 0.15              | 0.69                           | 0.66                          | 0.38                               |
| ROO13   | 215.9     | RF  | 0.52                           | 0.76                                         | 0.28               | 0.05              | 0.75                           | 0.76                          | 0.23                               |

**Table S55.** Hyperparameters associated to models ROO10-ROO13. The list is reported as python dictionaries.

| # Model | Hyperparameters                                                                                                                        |
|---------|----------------------------------------------------------------------------------------------------------------------------------------|
| ROO10   | {'class_weight': None, 'C': 96.78, 'kernel': 'linear', 'probability': True}                                                            |
| ROO11   | {'n_estimators': 135, 'max_depth': 1, 'min_samples_leaf': 0.15, 'min_samples_split': 0.83, 'max_features': 'auto'}                     |
| ROO12   | {'n_neighbors': 8, 'weights': 'distance', 'algorithm': 'brute', 'leaf_size': 37, 'metric': 'chebyshev', 'metric_params': None, 'p': 2} |
| ROO13   | {'class_weight': 'balanced', 'n_estimators': 51, 'max_depth': 10, 'min_samples_split': 0.68, 'min_samples_leaf': 0.21}                 |

6.4. 100000 random iterations.

For the random search with 10000 iterations, the ML classifiers and the thresholds were selected on the basis of models in Tables S14 and S15. Here the random search with 100000 iterations was run using SVM, GB and RF and the thresholds values were reduced to 113.05, 164.548 and 215.9.

**Table S56.** Refined best models obtained for each classifier.

| # Model | Threshold | ML  | Average<br>MCC <sub>Pred</sub> | Average<br>Normalized<br>MCC <sub>Pred</sub> | MCC <sub>Fit</sub> | MCC <sub>CV</sub> | Average<br>ACC <sub>Pred</sub> | Average<br>F1 <sub>Pred</sub> | Average<br>ROC_AUC <sub>Pred</sub> |
|---------|-----------|-----|--------------------------------|----------------------------------------------|--------------------|-------------------|--------------------------------|-------------------------------|------------------------------------|
| ROO14   | 164.548   | SVM | 0.58                           | 0.79                                         | 1.00               | 0.16              | 0.82                           | 0.67                          | 0.33                               |
| ROO15   | 164.548   | GB  | 0.47                           | 0.73                                         | 0.75               | 0.37              | 0.77                           | 0.54                          | 0.45                               |
| ROO16   | 215.9     | RF  | 0.58                           | 0.79                                         | 0.84               | 0.11              | 0.77                           | 0.75                          | 0.28                               |

**Table S57.** Hyperparameters associated to models ROO14-ROO16. The list is reported as python dictionaries.

| # Model | Hyperparameters                                                                                                        |
|---------|------------------------------------------------------------------------------------------------------------------------|
| ROO14   | {'class_weight': None, 'C': 96.70, 'kernel': 'linear', 'probability': True}                                            |
| ROO15   | {'n_estimators': 48, 'max_depth': 1, 'min_samples_leaf': 0.40, 'min_samples_split': 0.46, 'max_features': 'sqrt'}      |
| ROO16   | {'class_weight': 'balanced', 'n_estimators': 141, 'max_depth': 2, 'min_samples_split': 0.15, 'min_samples_leaf': 0.16} |

## 7. OH-RBD<sub>50</sub>

7.1. 100 random iterations.

During the random search with 100 iterations, the classifiers used were: SVM, GB, KNN, RF and DT with the threshold listed in Table S7.

**Table S58.** Coarse best models obtained for each classifier

| # Model | Threshold | ML  | Average<br>MCC <sub>Pred</sub> | Average<br>Normalized<br>MCC <sub>Pred</sub> | MCC <sub>Fit</sub> | MCC <sub>CV</sub> | Average<br>ACC <sub>Pred</sub> | Average<br>F1 <sub>Pred</sub> | Average<br>ROC_AUC <sub>Pred</sub> |
|---------|-----------|-----|--------------------------------|----------------------------------------------|--------------------|-------------------|--------------------------------|-------------------------------|------------------------------------|
| OH-RBD1 | 103.924   | SVM | 0.36                           | 0.68                                         | 0.85               | - 0.14            | 0.69                           | 0.57                          | 0.70                               |
| OH-RBD2 | 130.522   | GB  | 0.42                           | 0.71                                         | 0.96               | - 0.15            | 0.73                           | 0.58                          | 0.32                               |
| OH-RBD3 | 144.346   | KNN | 0.54                           | 0.77                                         | 1.00               | 0.01              | 0.77                           | 0.78                          | 0.28                               |
| OH-RBD4 | 144.346   | RF  | 0.28                           | 0.64                                         | 0.77               | 0.08              | 0.64                           | 0.64                          | 0.31                               |
| OH-RBD5 | 114.562   | DT  | 0.31                           | 0.65                                         | 0.36               | - 0.10            | 0.69                           | 0.53                          | 0.35                               |

**Table S59.** Hyperparameters associated to models OH-RBD1-OH-RBD5. The list is reported as python dictionaries.

| # Model | Hyperparameters                                                                                                                                             |
|---------|-------------------------------------------------------------------------------------------------------------------------------------------------------------|
| OH-RBD1 | {'class_weight': None, 'C': 81.81836363636364, 'kernel': 'sigmoid', 'probability': True}                                                                    |
| OH-RBD2 | {'n_estimators': 140, 'max_depth': 1, 'min_samples_leaf': 0.1, 'min_samples_split': 0.6, 'max_features': None}                                              |
| OH-RBD3 | {'n_neighbors': 20, 'weights': 'distance', 'algorithm': 'kd_tree', 'leaf_size': 10, 'metric': 'chebyshev', 'metric_params': None, 'p': 3}                   |
| OH-RBD4 | {'class_weight': 'balanced', 'n_estimators': 950, 'max_depth': 11, 'min_samples_split': 0.4, 'min_samples_leaf': 0.1}                                       |
| OH-RBD5 | {'class_weight': None, 'criterion': 'entropy', 'splitter': 'best', 'max_depth': 7, 'min_samples_split': 0.9, 'min_samples_leaf': 0.2, 'max_features': None} |

7.2. 1000 random iterations.

For the intermediate random search with 1000 iterations, the ML classifiers and the thresholds were selected on the basis of best 5 models (Tables S10 and S11). Here the random search with 1000 iterations was run using SVM, GB, KNN, RF and DT and the thresholds values were reduced to 80.93, 82.598, 83.76, 88.228, 89.69, 103.924, 130.522, 134.938, 138.076, 144.346, 150.16 and 157.662.

**Table S60.** Coarse best models obtained for each classifier

| # Model  | Threshold | ML  | Average<br>MCC <sub>Pred</sub> | Average<br>Normalized<br>MCC <sub>Pred</sub> | MCC <sub>Fit</sub> | MCC <sub>Cv</sub> | Average<br>ACC <sub>Pred</sub> | Average<br>F1 <sub>Pred</sub> | Average<br>ROC_AUC <sub>Pred</sub> |
|----------|-----------|-----|--------------------------------|----------------------------------------------|--------------------|-------------------|--------------------------------|-------------------------------|------------------------------------|
| OH-RBD6  | 103.924   | SVM | 0.37                           | 0.69                                         | 0.52               | - 0.13            | 0.69                           | 0.56                          | 0.69                               |
| OH-RBD7  | 144.346   | GB  | 0.45                           | 0.73                                         | 1.00               | 0.01              | 0.73                           | 0.72                          | 0.72                               |
| OH-RBD8  | 144.346   | KNN | 0.54                           | 0.77                                         | 1.00               | 0.01              | 0.77                           | 0.78                          | 0.28                               |
| OH-RBD9  | 144.346   | RF  | 0.43                           | 0.71                                         | 0.67               | - 0.05            | 0.70                           | 0.69                          | 0.29                               |
| OH-RBD10 | 80.93     | DT  | 0.43                           | 0.72                                         | 0.31               | - 0.09            | 0.77                           | 0.55                          | 0.30                               |

**Table S61.** Hyperparameters associated to models OH-RBD6-OH-RBD10. The list is reported as python dictionaries.

| # Model  | Hyperparameters                                                                                                                                                  |
|----------|------------------------------------------------------------------------------------------------------------------------------------------------------------------|
| OH-RBD6  | {'class_weight': 'balanced', 'C': 76.77, 'kernel': 'sigmoid', 'probability': True}                                                                               |
| OH-RBD7  | {'n_estimators': 140, 'max_depth': 2, 'min_samples_leaf': 0.1, 'min_samples_split': 0.6, 'max_features': 'log2'}                                                 |
| OH-RBD8  | {'n_neighbors': 20, 'weights': 'distance', 'algorithm': 'kd_tree', 'leaf_size': 30, 'metric': 'chebyshev', 'metric_params': None, 'p': 2}                        |
| OH-RBD9  | {'class_weight': 'balanced', 'n_estimators': 1000, 'max_depth': 2, 'min_samples_split': 0.6, 'min_samples_leaf': 0.2}                                            |
| OH-RBD10 | {'class_weight': 'balanced', 'criterion': 'gini', 'splitter': 'best', 'max_depth': 9, 'min_samples_split': 0.5, 'min_samples_leaf': 0.2, 'max_features': 'log2'} |

### 7.3. 10000 random iterations.

For the random search with 10000 iterations, the ML classifiers and the thresholds were selected on the basis of best 5 models (Tables S12 and S13). Here the random search with 1000 iterations was run using SVM, GB and KNN and the thresholds values were reduced to 80.93, 82.598, 103.924, 144.346 and 157.662.

**Table S62.** Refined best models obtained for each classifier.

| # Model  | Threshold | ML  | Average<br>MCC <sub>Pred</sub> | Average<br>Normalized<br>MCC <sub>Pred</sub> | MCC <sub>Fit</sub> | MCC <sub>Cv</sub> | Average<br>ACC <sub>Pred</sub> | Average<br>F1 <sub>Pred</sub> | Average<br>ROC_AUC <sub>Pred</sub> |
|----------|-----------|-----|--------------------------------|----------------------------------------------|--------------------|-------------------|--------------------------------|-------------------------------|------------------------------------|
| OH-RBD11 | 103.924   | SVM | 0.37                           | 0.69                                         | 0.52               | - 0.13            | 0.69                           | 0.56                          | 0.55                               |
| OH-RBD12 | 144.346   | GB  | 0.49                           | 0.74                                         | 0.77               | 0.01              | 0.74                           | 0.74                          | 0.37                               |
| OH-RBD13 | 144.346   | KNN | 0.48                           | 0.74                                         | 1.00               | - 0.09            | 0.74                           | 0.75                          | 0.28                               |

**Table S63.** Hyperparameters associated to models OH-RBD11-OH-RBD13. The list is reported as python dictionaries.

| # Model  | Hyperparameters                                                                                                                         |
|----------|-----------------------------------------------------------------------------------------------------------------------------------------|
| OH-RBD11 | {'class_weight': 'balanced', 'C': 75.28, 'kernel': 'sigmoid', 'probability': True}                                                      |
| OH-RBD12 | {'n_estimators': 94, 'max_depth': 8, 'min_samples_leaf': 0.48, 'min_samples_split': 0.89, 'max_features': 'sqrt'}                       |
| OH-RBD13 | {'n_neighbors': 17, 'weights': 'distance', 'algorithm': 'brute', 'leaf_size': 25, 'metric': 'chebyshev', 'metric_params': None, 'p': 5} |

7.4. 100000 random iterations.

For the random search with 10000 iterations, the ML classifiers and the thresholds were selected on the basis of models in Tables S14 and S15. Here the random search with 100000 iterations was run using SVM, GB and KNN and the thresholds values were reduced to 80.93, 144.346 and 157.662.

**Table S64.** Refined best models obtained for each classifier.

| # Model  | Threshold | ML  | Average<br>MCC <sub>Pred</sub> | Average<br>Normalized<br>MCC <sub>Pred</sub> | MCC <sub>Fit</sub> | MCC <sub>Cv</sub> | Average<br>ACC <sub>Pred</sub> | Average<br>F1 <sub>Pred</sub> | Average<br>ROC_AUC <sub>Pred</sub> |
|----------|-----------|-----|--------------------------------|----------------------------------------------|--------------------|-------------------|--------------------------------|-------------------------------|------------------------------------|
| OH-RBD14 | 144.346   | SVM | 0.32                           | 0.66                                         | 0.41               | - 0.05            | 0.67                           | 0.71                          | 0.64                               |
| OH-RBD15 | 157.662   | GB  | 0.52                           | 0.76                                         | 0.83               | 0.03              | 0.77                           | 0.82                          | 0.28                               |
| OH-RBD16 | 157.662   | KNN | 0.35                           | 0.67                                         | 1.00               | 0.16              | 0.67                           | 0.77                          | 0.36                               |

**Table S65.** Hyperparameters associated to models OH-RBD14-OH-RBD16. The list is reported as python dictionaries.

| # Model  | Hyperparameters                                                                                                                             |
|----------|---------------------------------------------------------------------------------------------------------------------------------------------|
| OH-RBD14 | {'class_weight': None, 'C': 6.31, 'kernel': 'sigmoid', 'probability': True}                                                                 |
| OH-RBD15 | {'n_estimators': 93, 'max_depth': 14, 'min_samples_leaf': 0.45, 'min_samples_split': 0.15, 'max_features': 'sqrt'}                          |
| OH-RBD16 | {'n_neighbors': 24, 'weights': 'distance', 'algorithm': 'ball_tree', 'leaf_size': 34, 'metric': 'chebyshev', 'metric_params': None, 'p': 4} |

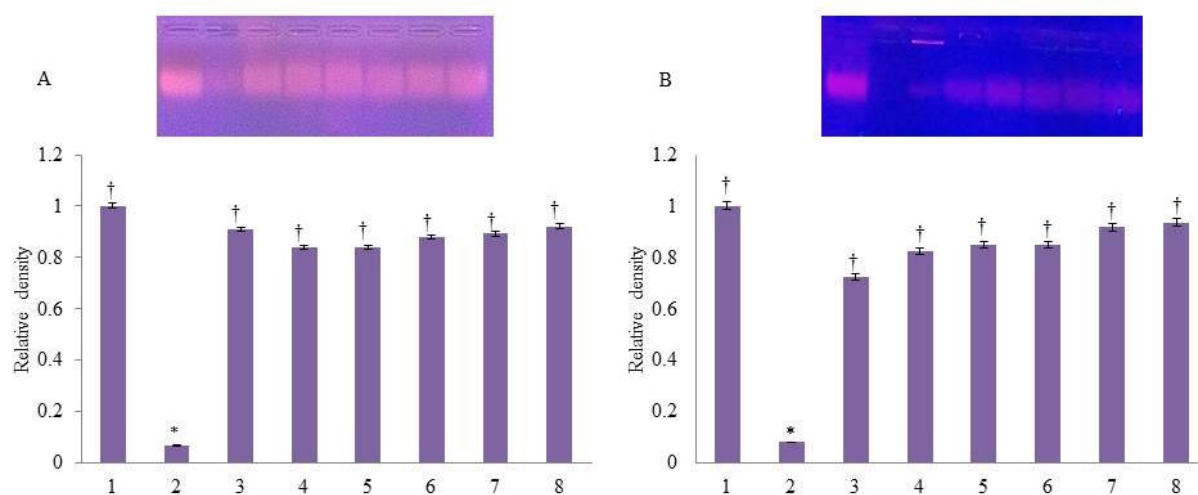

**Figure S1.** Protective effect of Chamomile morocco EO against peroxyl (A) and hydroxyl (B) radicals-induced DNA damage. DNA from salmon sperm (lane 1, negative control), DNA damage control (lane 2, positive control), quercetin (lane 3, 100 µg/mL, standard), essential oils in concentrations of 25, 50, 100, 200, and 400 µg/mL (lanes 4, 5, 6, 7, and 8). \*p < 0.05 when compared with the negative control group †p < 0.05 when compared with the positive control group.

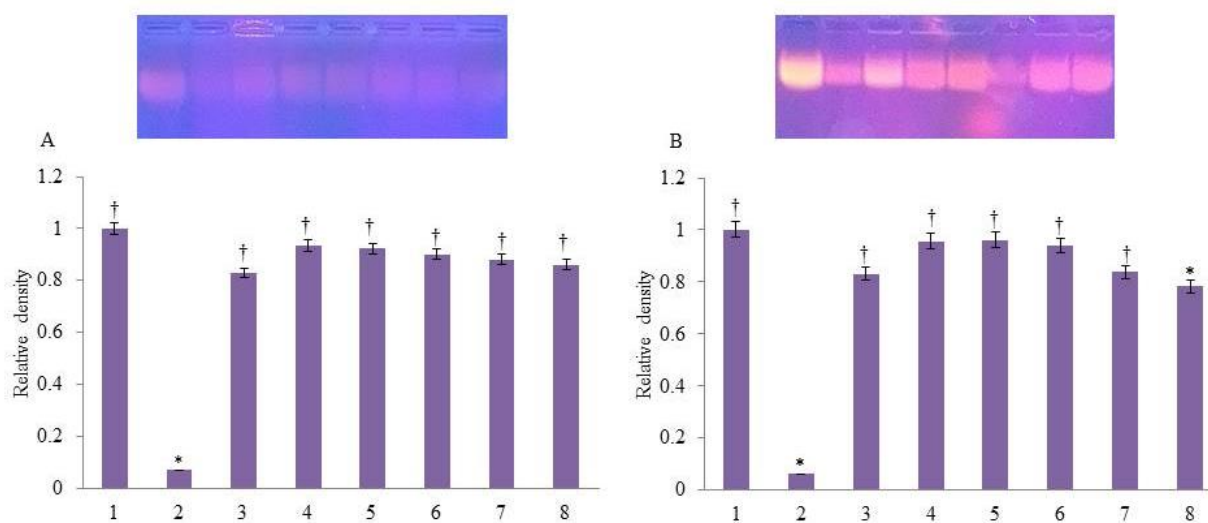

**Figure S2.** Protective effect of Clary sage EO against peroxyl (A) and hydroxyl (B) radicals-induced DNA damage. DNA from salmon sperm (lane 1, negative control), DNA damage control (lane 2, positive control), quercetin (lane 3, 100 µg/mL, standard), essential oils in concentrations of 25, 50, 100, 200, and 400 µg/mL (lanes 4, 5, 6, 7, and 8). \*p < 0.05 when compared with the negative control group †p < 0.05 when compared with the positive control group.

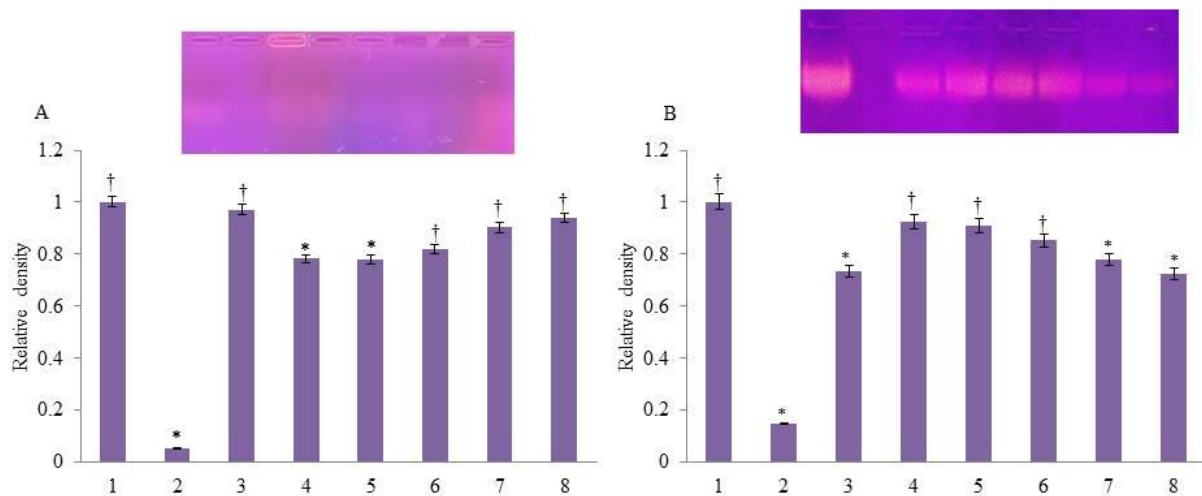

**Figure S3.** Protective effect of Sage EO against peroxyl (A) and hydroxyl (B) radicals-induced DNA damage. DNA from salmon sperm (lane 1, negative control), DNA damage control (lane 2, positive control), quercetin (lane 3, 100 µg/mL, standard), essential oils in concentrations of 25, 50, 100, 200, and 400 µg/mL (lanes 4, 5, 6, 7, and 8). \* $p < 0.05$  when compared with the negative control group † $p < 0.05$  when compared with the positive control group.

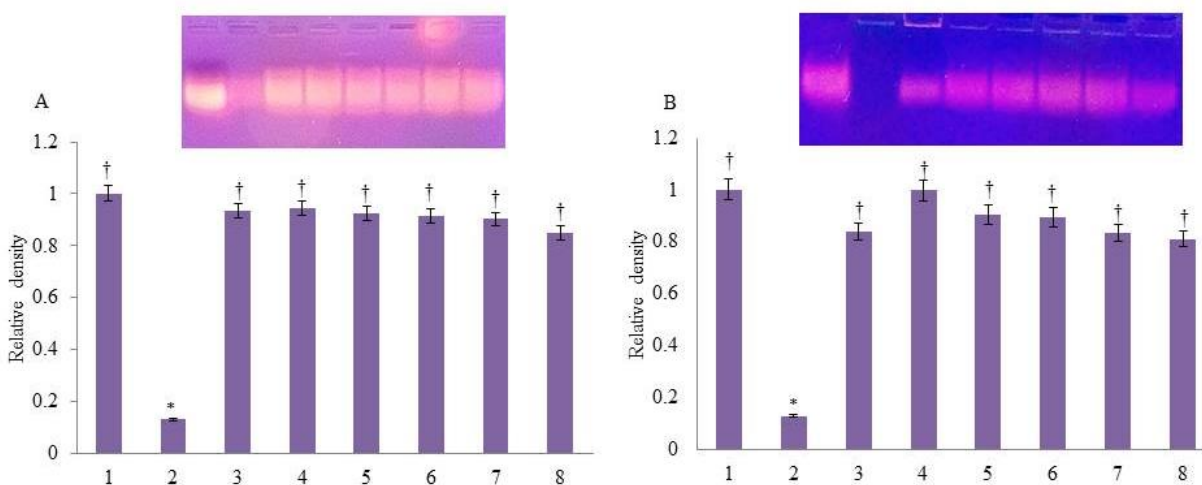

**Figure S4.** Protective effect of Red thyme EO against peroxyl (A) and hydroxyl (B) radicals-induced DNA damage. DNA from salmon sperm (lane 1, negative control), DNA damage control (lane 2, positive control), quercetin (lane 3, 100 µg/mL, standard), essential oils in concentrations of 25, 50, 100, 200, and 400 µg/mL (lanes 4, 5, 6, 7, and 8). \* $p < 0.05$  when compared with the negative control group † $p < 0.05$  when compared with the positive control group.

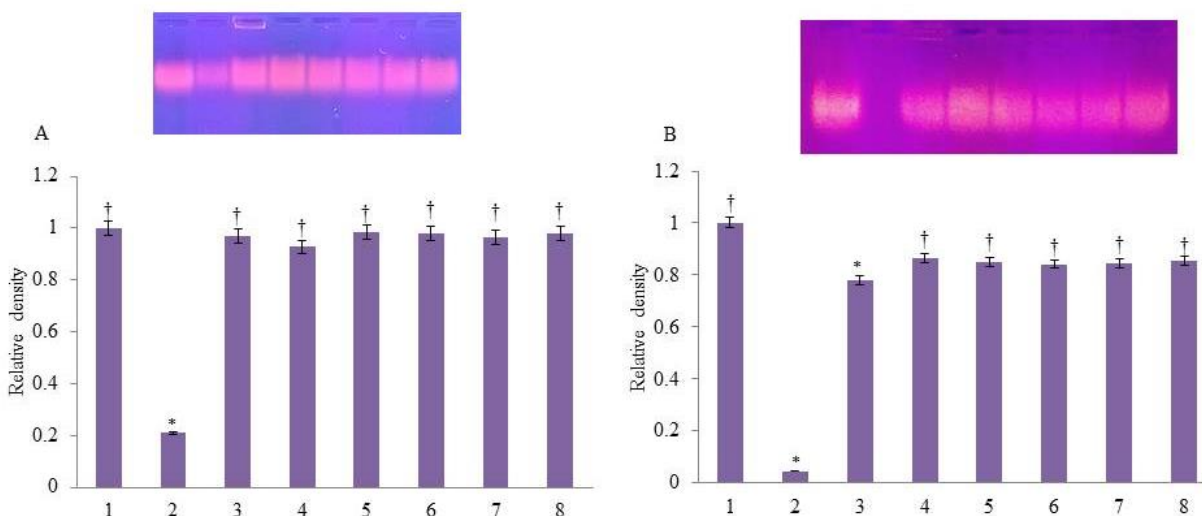

**Figure S5.** Protective effect of Tea tree EO against peroxyl (A) and hydroxyl (B) radicals-induced DNA damage. DNA from salmon sperm (lane 1, negative control), DNA damage control (lane 2, positive control), quercetin (lane 3, 100 µg/mL, standard), essential oils in concentrations of 25, 50, 100, 200, and 400 µg/mL (lanes 4, 5, 6, 7, and 8). \* $p < 0.05$  when compared with the negative control group † $p < 0.05$  when compared with the positive control group.

standard), essential oils in concentrations of 25, 50, 100, 200, and 400  $\mu\text{g/mL}$  (lanes 4, 5, 6, 7, and 8). \* $p < 0.05$  when compared with the negative control group † $p < 0.05$  when compared with the positive control group.

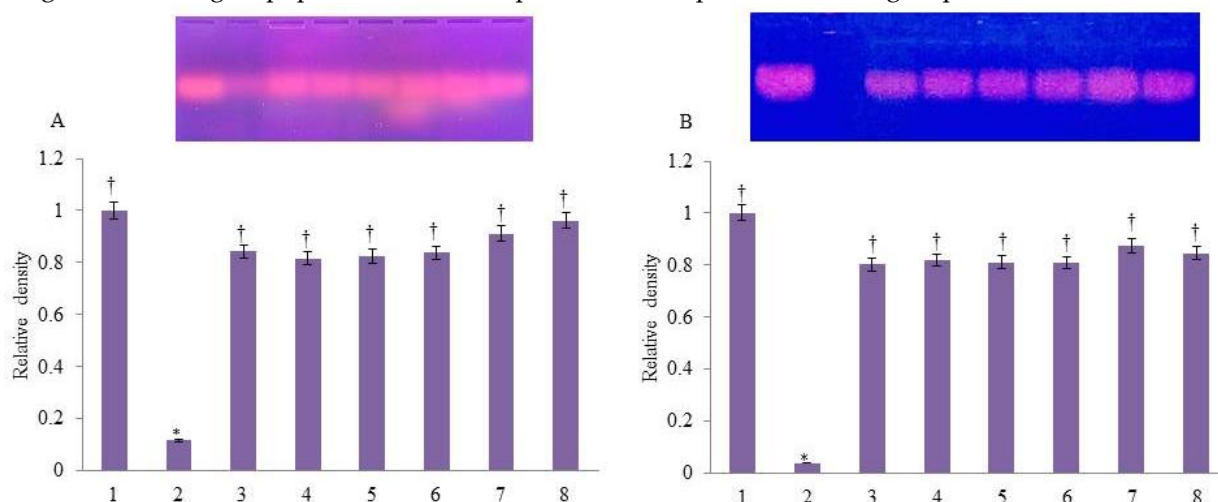

**Figure S6.** Protective effect of Melissa EO against peroxyl (A) and hydroxyl (B) radicals-induced DNA damage. DNA from salmon sperm (lane 1, negative control), DNA damage control (lane 2, positive control), quercetin (lane 3, 100  $\mu\text{g/mL}$ , standard), essential oils in concentrations of 25, 50, 100, 200, and 400  $\mu\text{g/mL}$  (lanes 4, 5, 6, 7, and 8). \* $p < 0.05$  when compared with the negative control group † $p < 0.05$  when compared with the positive control group.

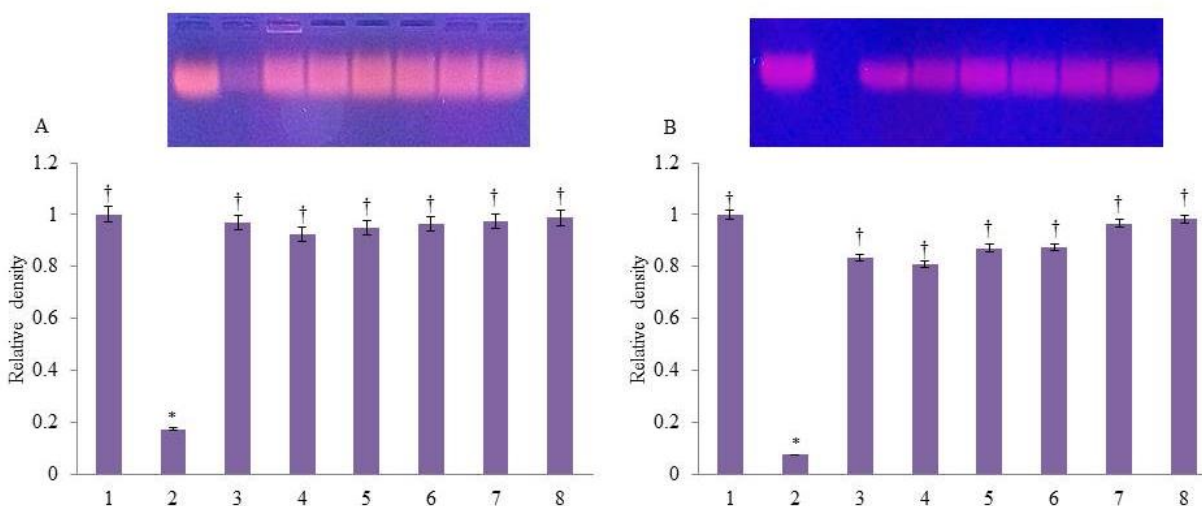

**Figure S7.** Protective effect of Mountain pine EO against peroxyl (A) and hydroxyl (B) radicals-induced DNA damage. DNA from salmon sperm (lane 1, negative control), DNA damage control (lane 2, positive control), quercetin (lane 3, 100  $\mu\text{g/mL}$ , standard), essential oils in concentrations of 25, 50, 100, 200, and 400  $\mu\text{g/mL}$  (lanes 4, 5, 6, 7, and 8). \* $p < 0.05$  when compared with the negative control group † $p < 0.05$  when compared with the positive control group.

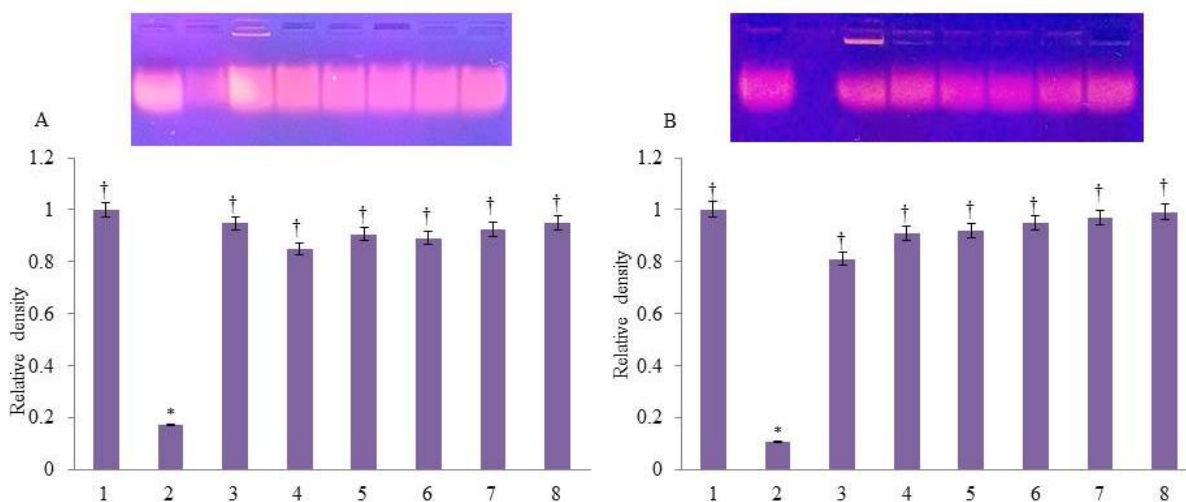

**Figure S8.** Protective effect of Geranium bourbon EO against peroxy (A) and hydroxyl (B) radicals-induced DNA damage. DNA from salmon sperm (lane 1, negative control), DNA damage control (lane 2, positive control), quercetin (lane 3, 100  $\mu\text{g/mL}$ , standard), essential oils in concentrations of 25, 50, 100, 200, and 400  $\mu\text{g/mL}$  (lanes 4, 5, 6, 7, and 8). \* $p < 0.05$  when compared with the negative control group † $p < 0.05$  when compared with the positive control group.

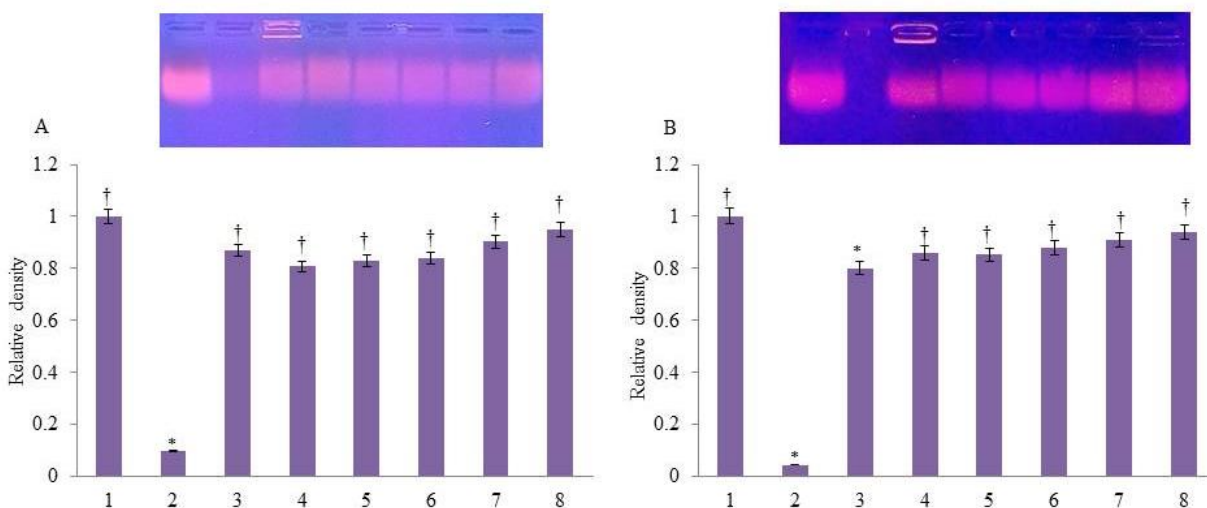

**Figure S9.** Protective effect of Oregano EO against peroxy (A) and hydroxyl (B) radicals-induced DNA damage. DNA from salmon sperm (lane 1, negative control), DNA damage control (lane 2, positive control), quercetin (lane 3, 100  $\mu\text{g/mL}$ , standard), essential oils in concentrations of 25, 50, 100, 200, and 400  $\mu\text{g/mL}$  (lanes 4, 5, 6, 7, and 8). \* $p < 0.05$  when compared with the negative control group † $p < 0.05$  when compared with the positive control group.

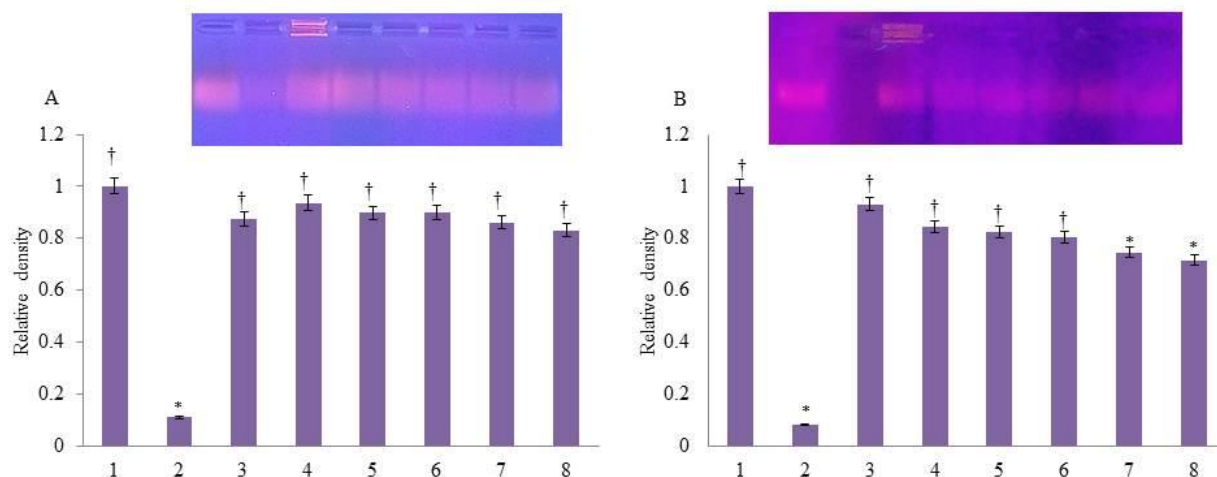

**Figure S10.** Protective effect of Coriander EO against peroxy (A) and hydroxyl (B) radicals-induced DNA damage. DNA from salmon sperm (lane 1, negative control), DNA damage control (lane 2, positive control), quercetin (lane 3, 100  $\mu\text{g/mL}$ , standard), essential oils in concentrations of 25, 50, 100, 200, and 400  $\mu\text{g/mL}$  (lanes 4, 5, 6, 7, and 8). \* $p < 0.05$  when compared with the negative control group † $p < 0.05$  when compared with the positive control group.

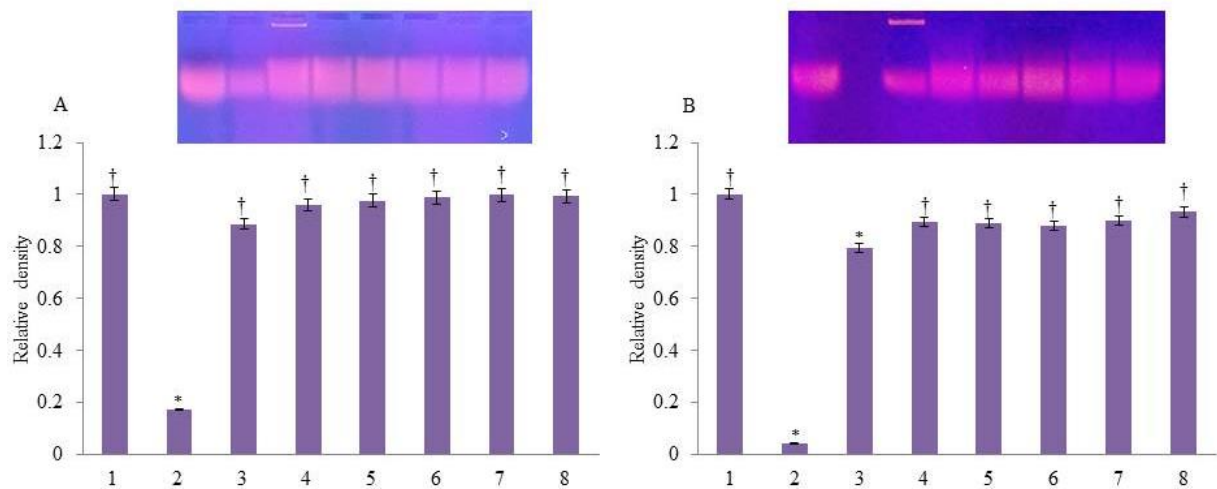

**Figure S11.** Protective effect of Lavander EO against peroxyl (A) and hydroxyl (B) radicals-induced DNA damage. DNA from salmon sperm (lane 1, negative control), DNA damage control (lane 2, positive control), quercetin (lane 3, 100 µg/mL, standard), essential oils in concentrations of 25, 50, 100, 200, and 400 µg/mL (lanes 4, 5, 6, 7, and 8). \* $p < 0.05$  when compared with the negative control group † $p < 0.05$  when compared with the positive control group.

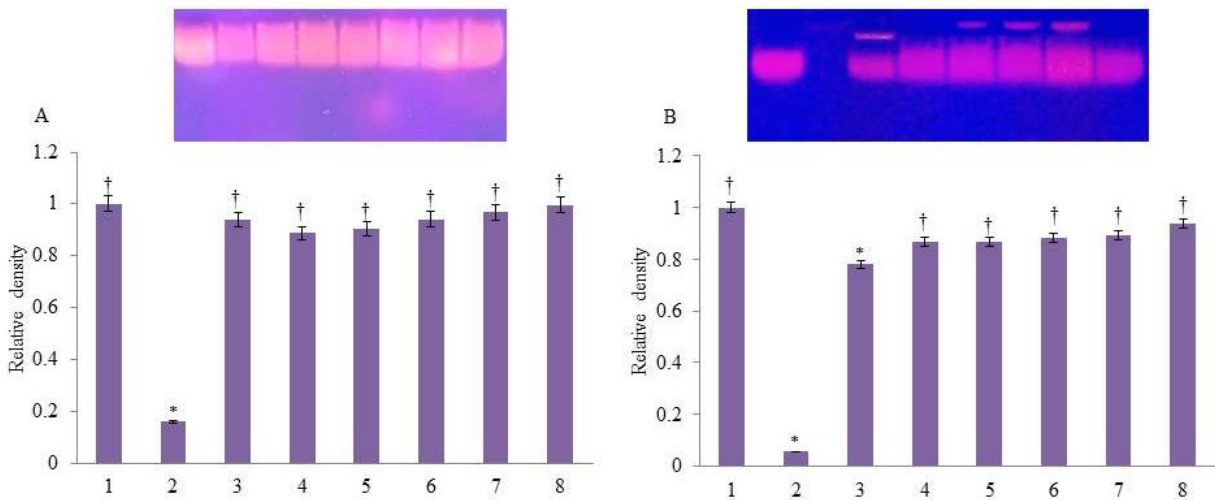

**Figure S12.** Protective effect of Myrtle EO against peroxyl (A) and hydroxyl (B) radicals-induced DNA damage. DNA from salmon sperm (lane 1, negative control), DNA damage control (lane 2, positive control), quercetin (lane 3, 100 µg/mL, standard), essential oils in concentrations of 25, 50, 100, 200, and 400 µg/mL (lanes 4, 5, 6, 7, and 8). \* $p < 0.05$  when compared with the negative control group † $p < 0.05$  when compared with the positive control group.

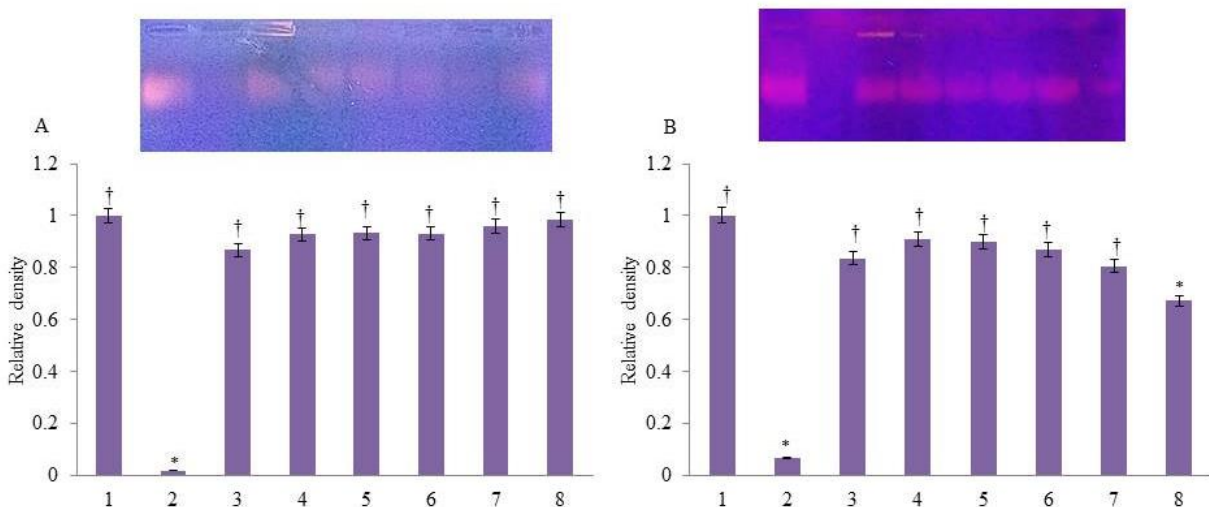

**Figure S13.** Protective effect of Garlic EO against peroxyl (A) and hydroxyl (B) radicals-induced DNA damage. DNA from salmon sperm (lane 1, negative control), DNA damage control (lane 2, positive control), quercetin (lane 3, 100 µg/mL, standard), essential oils in concentrations of 25, 50, 100, 200, and 400 µg/mL (lanes 4, 5, 6, 7, and 8). \* $p < 0.05$  when compared with the negative control group † $p < 0.05$  when compared with the positive control group.

standard), essential oils in concentrations of 25, 50, 100, 200, and 400  $\mu\text{g/mL}$  (lanes 4, 5, 6, 7, and 8). \* $p < 0.05$  when compared with the negative control group † $p < 0.05$  when compared with the positive control group.

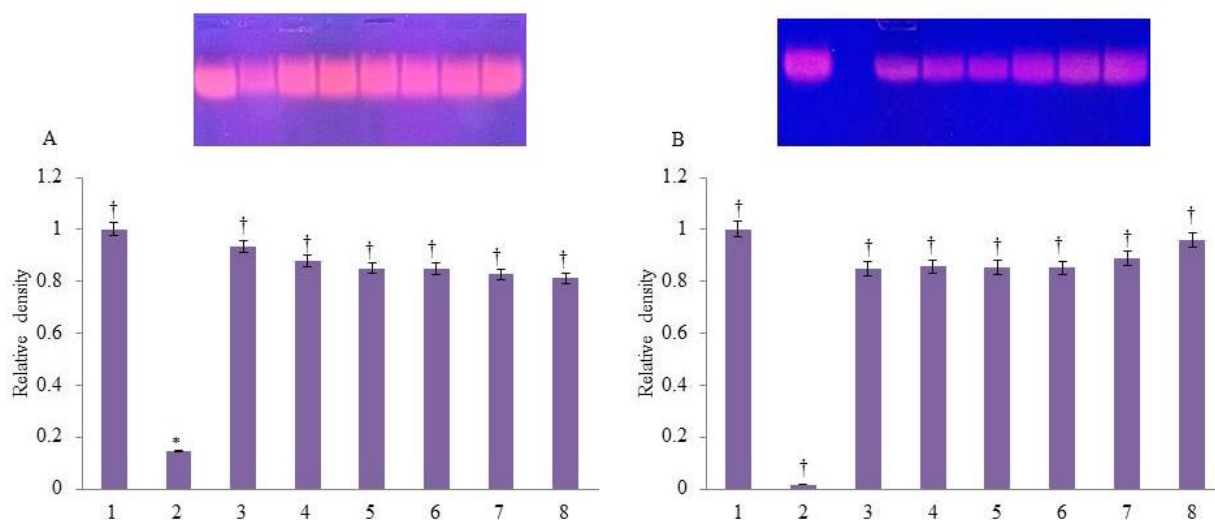

**Figure S14.** Protective effect of Cardamom EO against peroxyl (A) and hydroxyl (B) radicals-induced DNA damage. DNA from salmon sperm (lane 1, negative control), DNA damage control (lane 2, positive control), quercetin (lane 3, 100  $\mu\text{g/mL}$ , standard), essential oils in concentrations of 25, 50, 100, 200, and 400  $\mu\text{g/mL}$  (lanes 4, 5, 6, 7, and 8). \* $p < 0.05$  when compared with the negative control group † $p < 0.05$  when compared with the positive control group.

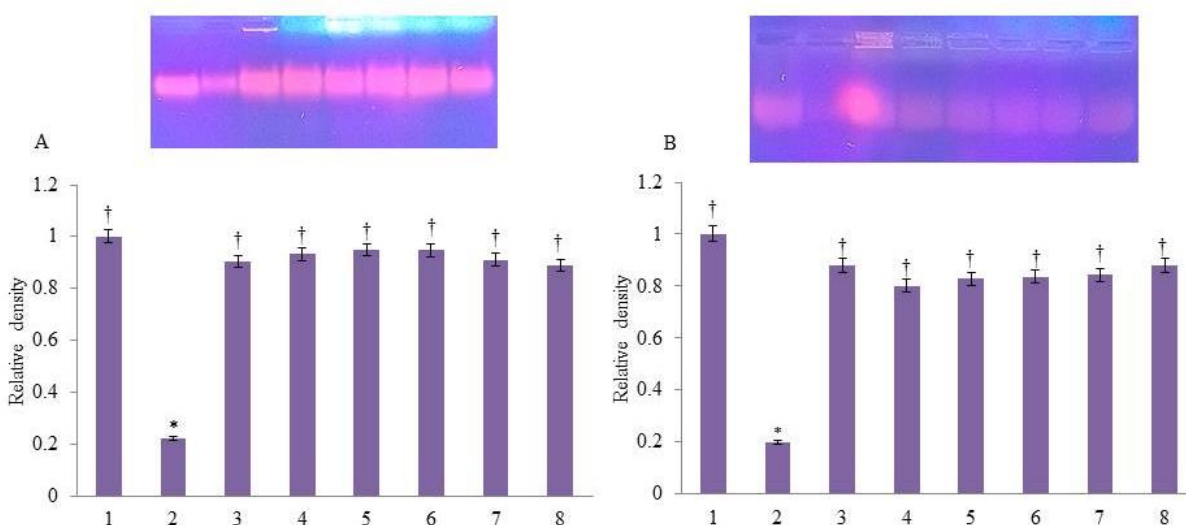

**Figure S15.** Protective effect of Mandarin EO against peroxyl (A) and hydroxyl (B) radicals-induced DNA damage. DNA from salmon sperm (lane 1, negative control), DNA damage control (lane 2, positive control), quercetin (lane 3, 100  $\mu\text{g/mL}$ , standard), essential oils in concentrations of 25, 50, 100, 200, and 400  $\mu\text{g/mL}$  (lanes 4, 5, 6, 7, and 8). \* $p < 0.05$  when compared with the negative control group † $p < 0.05$  when compared with the positive control group.

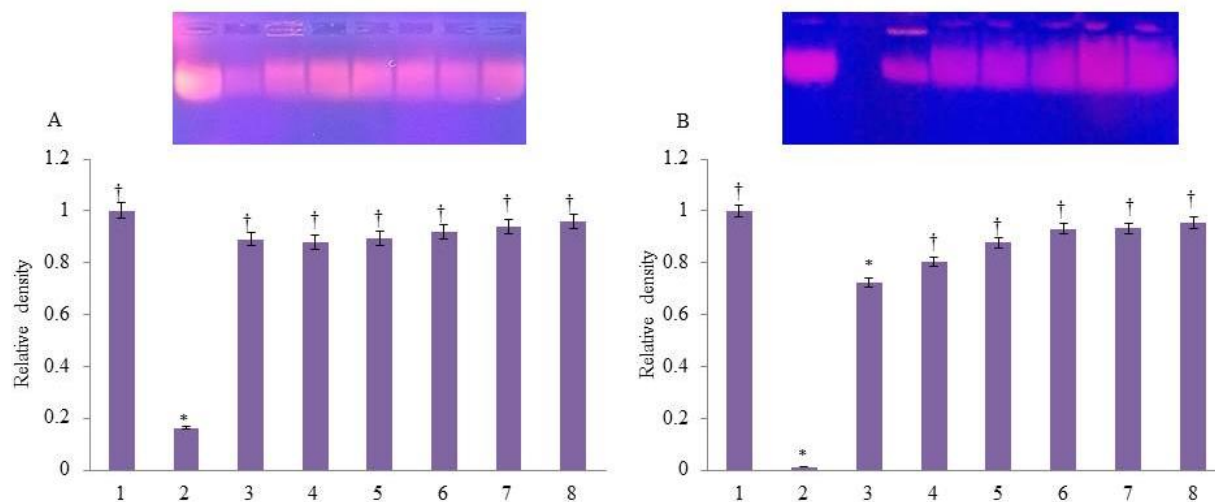

**Figure S16.** Protective effect of Hyssop EO against peroxyl (A) and hydroxyl (B) radicals-induced DNA damage. DNA from salmon sperm (lane 1, negative control), DNA damage control (lane 2, positive control), quercetin (lane 3, 100 µg/mL, standard), essential oils in concentrations of 25, 50, 100, 200, and 400 µg/mL (lanes 4, 5, 6, 7, and 8). \*p < 0.05 when compared with the negative control group †p < 0.05 when compared with the positive control group.

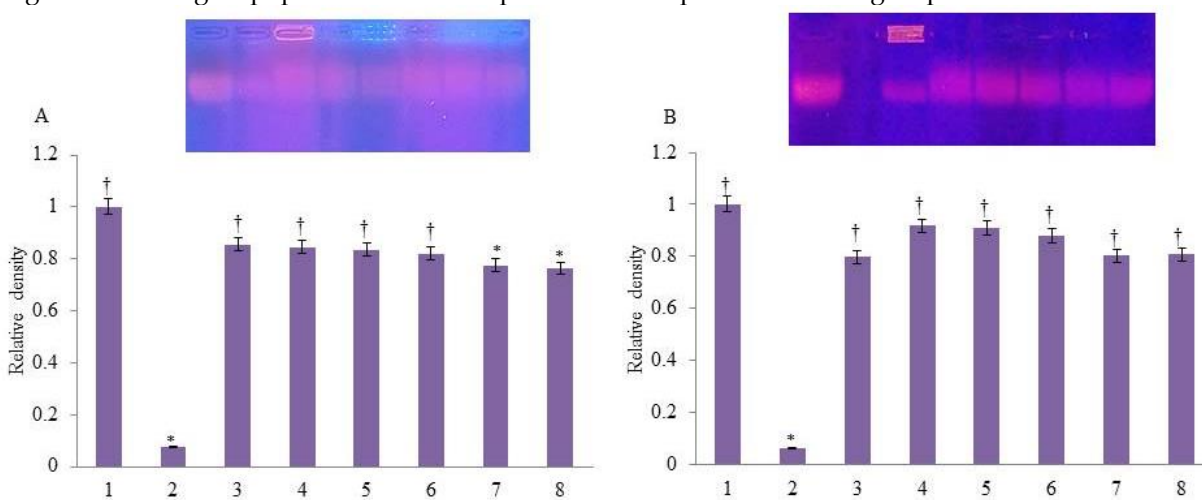

**Figure S17.** Protective effect of Grapefruit EO against peroxyl (A) and hydroxyl (B) radicals-induced DNA damage. DNA from salmon sperm (lane 1, negative control), DNA damage control (lane 2, positive control), quercetin (lane 3, 100 µg/mL, standard), essential oils in concentrations of 25, 50, 100, 200, and 400 µg/mL (lanes 4, 5, 6, 7, and 8). \*p < 0.05 when compared with the negative control group †p < 0.05 when compared with the positive control group.

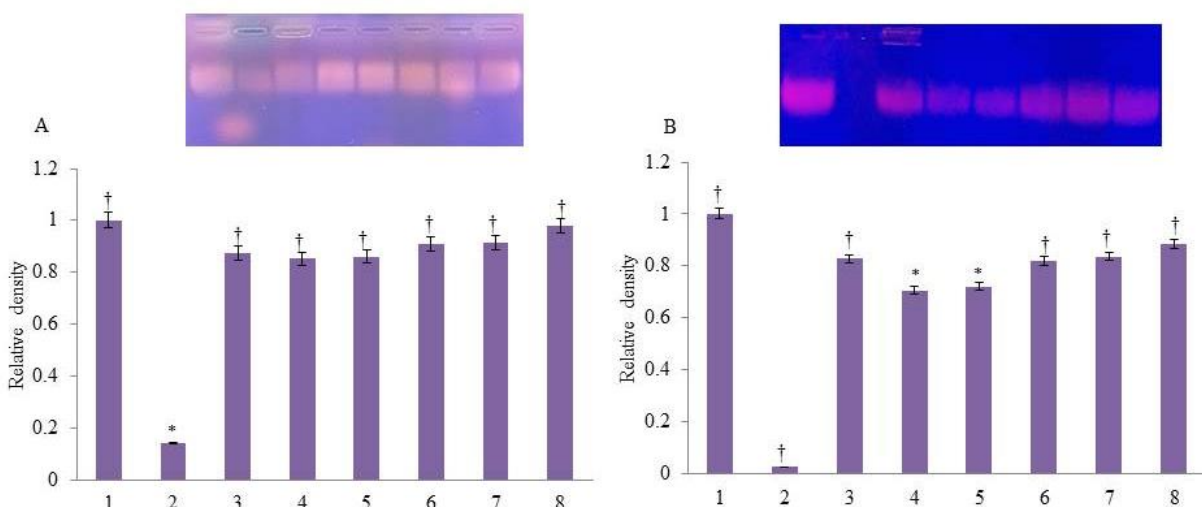

**Figure S18.** Protective effect of Lemongrass EO against peroxyl (A) and hydroxyl (B) radicals-induced DNA damage. DNA from salmon sperm (lane 1, negative control), DNA damage control (lane 2, positive control), quercetin (lane 3, 100 µg/mL,

standard), essential oils in concentrations of 25, 50, 100, 200, and 400  $\mu\text{g/mL}$  (lanes 4, 5, 6, 7, and 8). \* $p < 0.05$  when compared with the negative control group † $p < 0.05$  when compared with the positive control group.

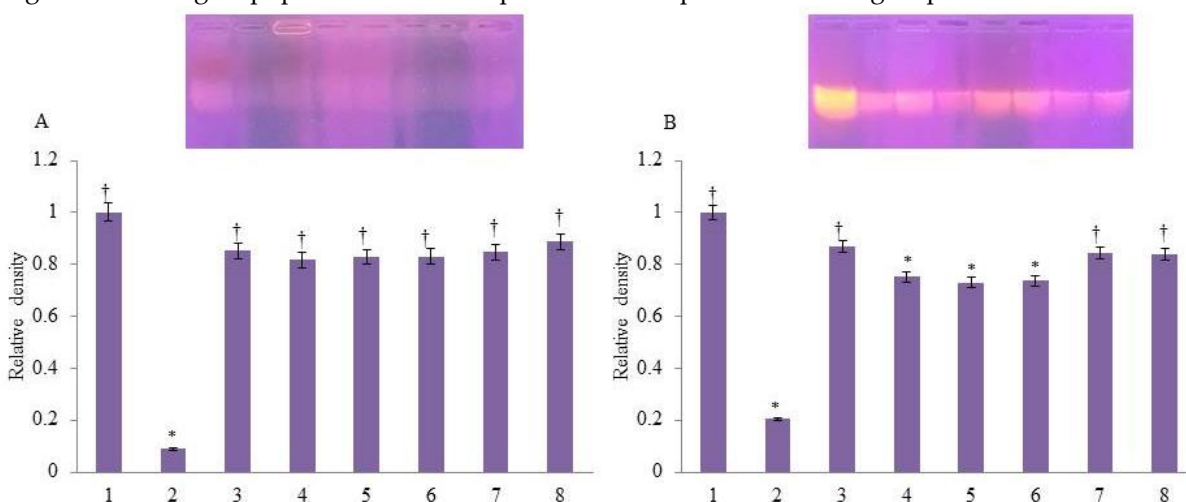

**Figure S19.** Protective effect of Siberian pine EO against peroxyl (A) and hydroxyl (B) radicals-induced DNA damage. DNA from salmon sperm (lane 1, negative control), DNA damage control (lane 2, positive control), quercetin (lane 3, 100  $\mu\text{g/mL}$ , standard), essential oils in concentrations of 25, 50, 100, 200, and 400  $\mu\text{g/mL}$  (lanes 4, 5, 6, 7, and 8). \* $p < 0.05$  when compared with the negative control group † $p < 0.05$  when compared with the positive control group.

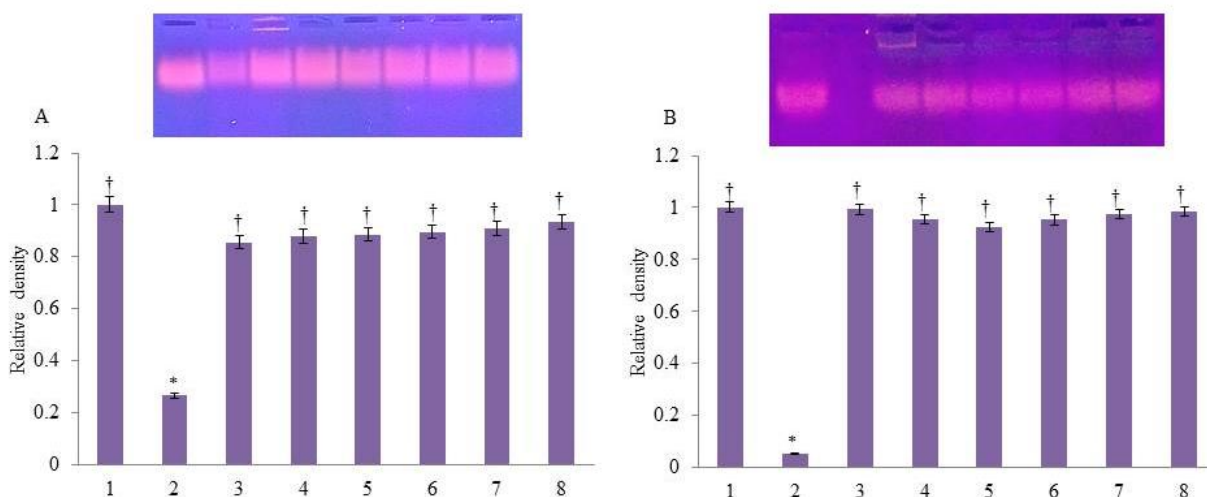

**Figure S20.** Protective effect of Camphor EO against peroxyl (A) and hydroxyl (B) radicals-induced DNA damage. DNA from salmon sperm (lane 1, negative control), DNA damage control (lane 2, positive control), quercetin (lane 3, 100  $\mu\text{g/mL}$ , standard), essential oils in concentrations of 25, 50, 100, 200, and 400  $\mu\text{g/mL}$  (lanes 4, 5, 6, 7, and 8). \* $p < 0.05$  when compared with the negative control group † $p < 0.05$  when compared with the positive control group.

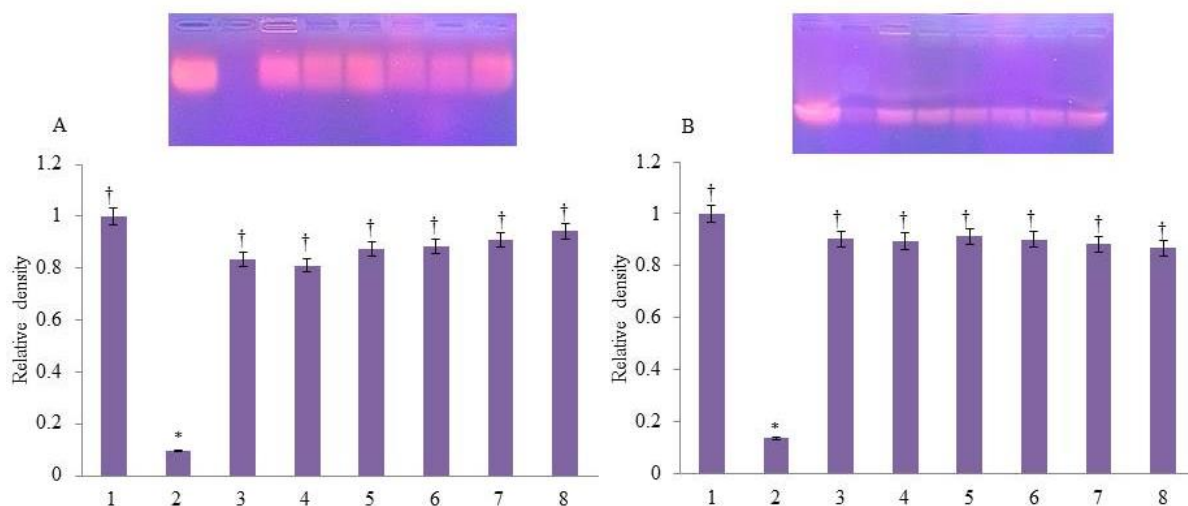

**Figure S21.** Protective effect of Cade EO against peroxy (A) and hydroxyl (B) radicals-induced DNA damage. DNA from salmon sperm (lane 1, negative control), DNA damage control (lane 2, positive control), quercetin (lane 3, 100  $\mu\text{g/mL}$ , standard), essential oils in concentrations of 25, 50, 100, 200, and 400  $\mu\text{g/mL}$  (lanes 4, 5, 6, 7, and 8). \* $p < 0.05$  when compared with the negative control group † $p < 0.05$  when compared with the positive control group.

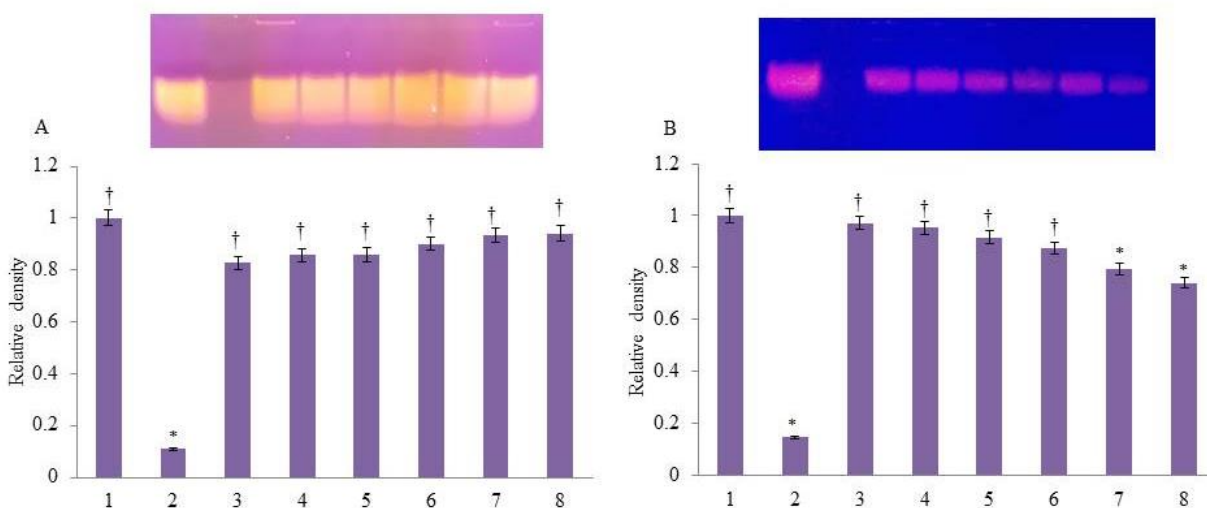

**Figure S22.** Protective effect of Cedar leaves EO against peroxy (A) and hydroxyl (B) radicals-induced DNA damage. DNA from salmon sperm (lane 1, negative control), DNA damage control (lane 2, positive control), quercetin (lane 3, 100  $\mu\text{g/mL}$ , standard), essential oils in concentrations of 25, 50, 100, 200, and 400  $\mu\text{g/mL}$  (lanes 4, 5, 6, 7, and 8). \* $p < 0.05$  when compared with the negative control group † $p < 0.05$  when compared with the positive control group.

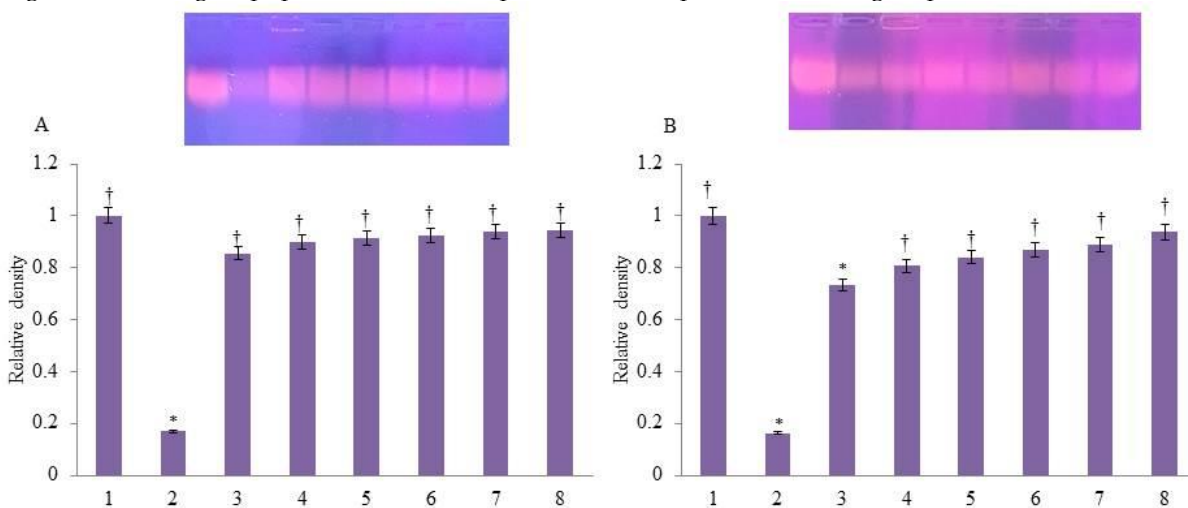

**Figure S23.** Protective effect of Ginger EO against peroxy (A) and hydroxyl (B) radicals-induced DNA damage. DNA from salmon sperm (lane 1, negative control), DNA damage control (lane 2, positive control), quercetin (lane 3, 100  $\mu\text{g/mL}$ , standard), essential oils in concentrations of 25, 50, 100, 200, and 400  $\mu\text{g/mL}$  (lanes 4, 5, 6, 7, and 8). \* $p < 0.05$  when compared with the negative control group † $p < 0.05$  when compared with the positive control group.

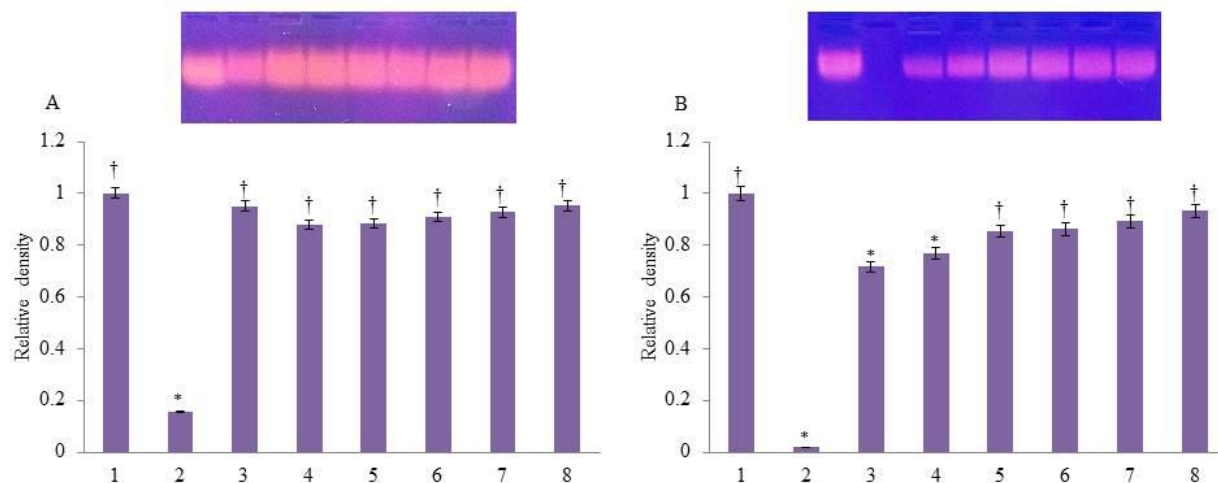

**Figure S24.** Protective effect of Cumin EO against peroxyl (A) and hydroxyl (B) radicals-induced DNA damage. DNA from salmon sperm (lane 1, negative control), DNA damage control (lane 2, positive control), quercetin (lane 3, 100 µg/mL, standard), essential oils in concentrations of 25, 50, 100, 200, and 400 µg/mL (lanes 4, 5, 6, 7, and 8). \* $p < 0.05$  when compared with the negative control group † $p < 0.05$  when compared with the positive control group.

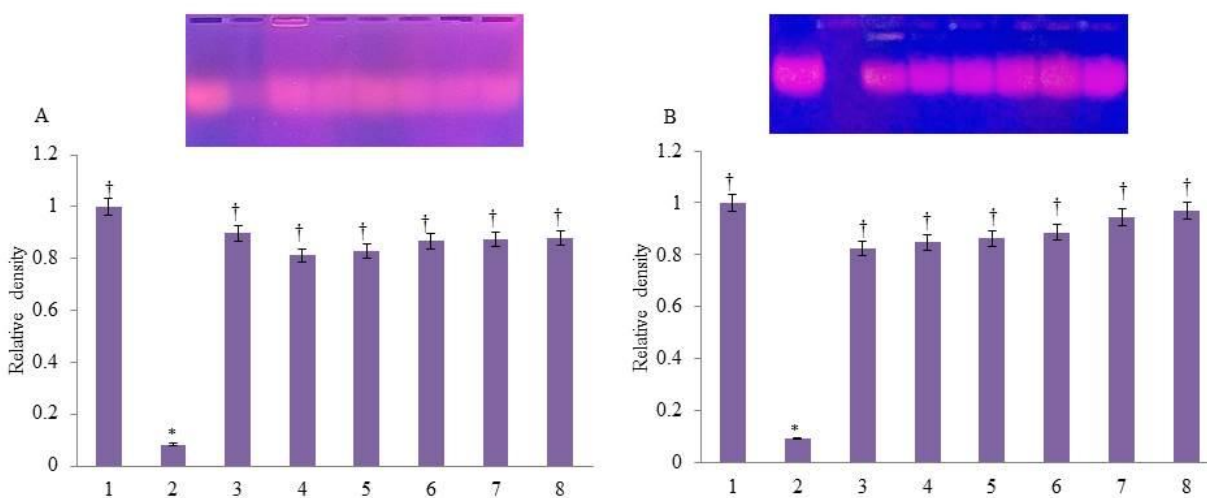

**Figure S25.** Protective effect of Patchouli EO against peroxyl (A) and hydroxyl (B) radicals-induced DNA damage. DNA from salmon sperm (lane 1, negative control), DNA damage control (lane 2, positive control), quercetin (lane 3, 100 µg/mL, standard), essential oils in concentrations of 25, 50, 100, 200, and 400 µg/mL (lanes 4, 5, 6, 7, and 8). \* $p < 0.05$  when compared with the negative control group † $p < 0.05$  when compared with the positive control group.

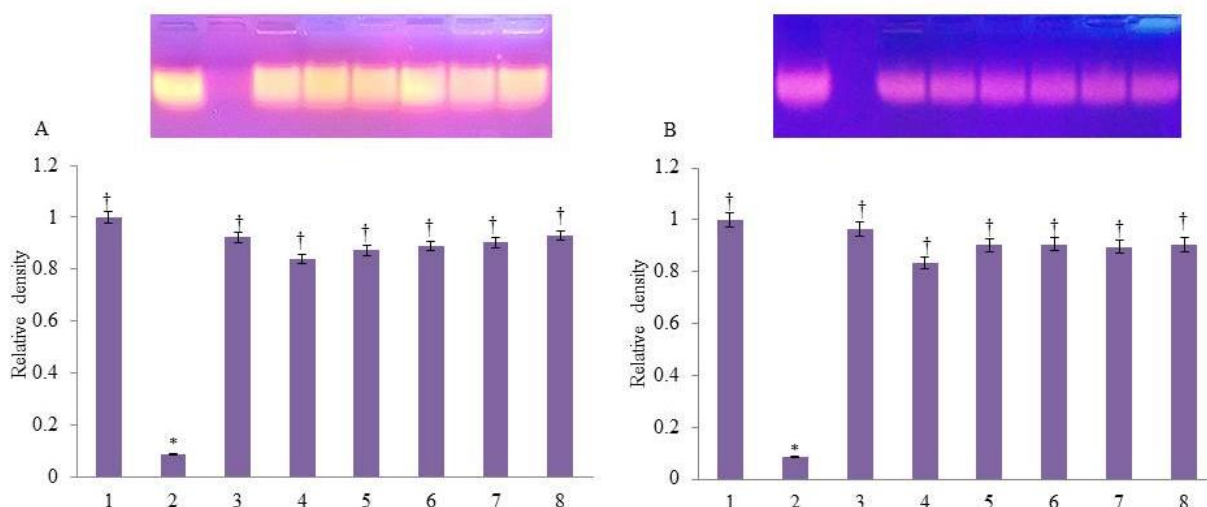

**Figure S26.** Protective effect of Orange bitter EO against peroxyl (A) and hydroxyl (B) radicals-induced DNA damage. DNA from salmon sperm (lane 1, negative control), DNA damage control (lane 2, positive control), quercetin (lane 3, 100 µg/mL, standard), essential oils in concentrations of 25, 50, 100, 200, and 400 µg/mL (lanes 4, 5, 6, 7, and 8). \* $p < 0.05$  when compared with the negative control group † $p < 0.05$  when compared with the positive control group.

standard), essential oils in concentrations of 25, 50, 100, 200, and 400  $\mu\text{g/mL}$  (lanes 4, 5, 6, 7, and 8). \* $p < 0.05$  when compared with the negative control group † $p < 0.05$  when compared with the positive control group.

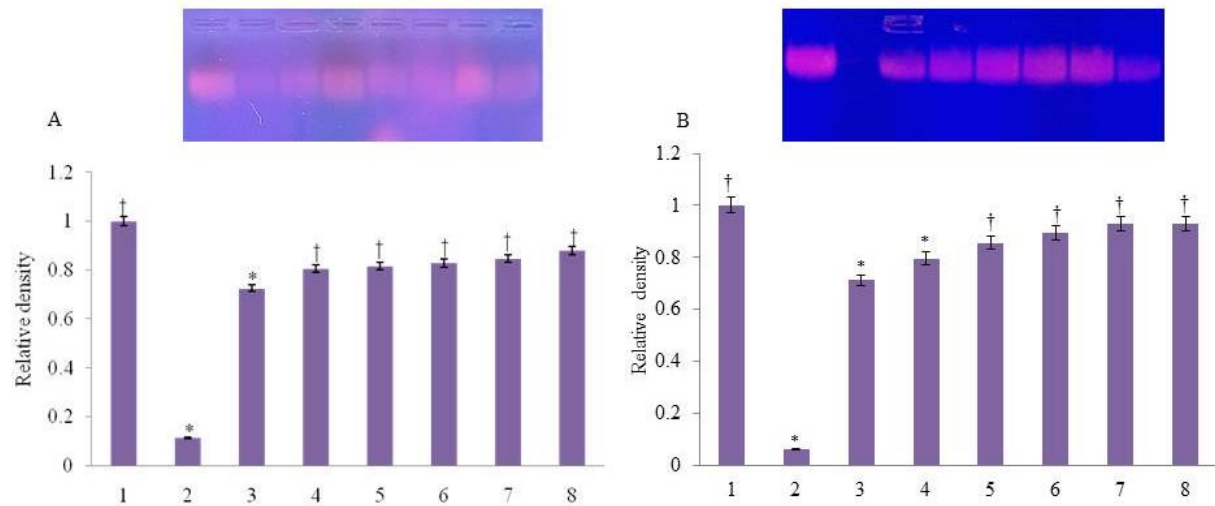

**Figure S27.** Protective effect of Eucalyptus EO against peroxyl (A) and hydroxyl (B) radicals-induced DNA damage. DNA from salmon sperm (lane 1, negative control), DNA damage control (lane 2, positive control), quercetin (lane 3, 100  $\mu\text{g/mL}$ , standard), essential oils in concentrations of 25, 50, 100, 200, and 400  $\mu\text{g/mL}$  (lanes 4, 5, 6, 7, and 8). \* $p < 0.05$  when compared with the negative control group † $p < 0.05$  when compared with the positive control group.

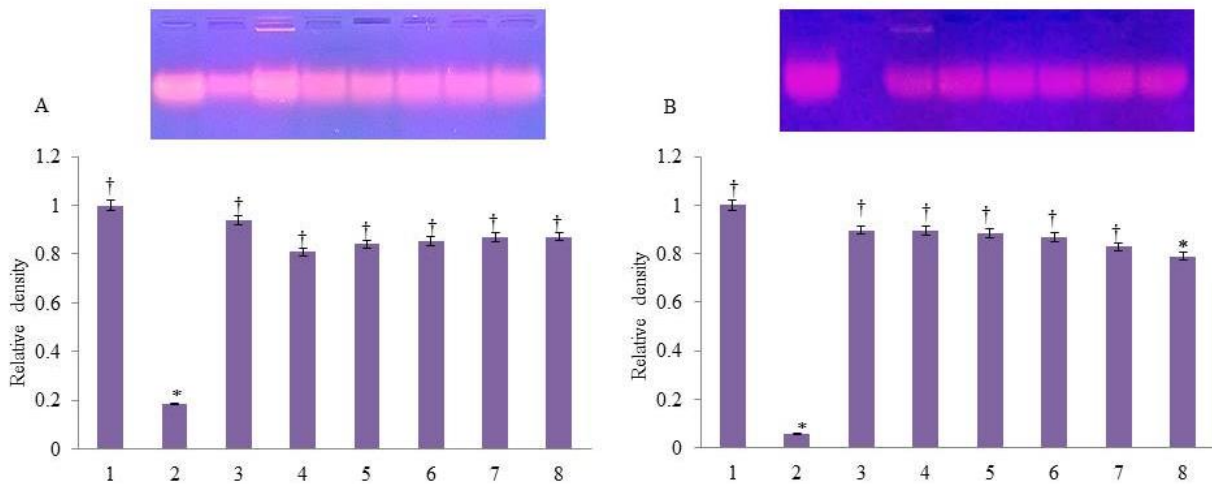

**Figure S28.** Protective effect of Pine silvestre natural EO against peroxyl (A) and hydroxyl (B) radicals-induced DNA damage. DNA from salmon sperm (lane 1, negative control), DNA damage control (lane 2, positive control), quercetin (lane 3, 100  $\mu\text{g/mL}$ , standard), essential oils in concentrations of 25, 50, 100, 200, and 400  $\mu\text{g/mL}$  (lanes 4, 5, 6, 7, and 8). \* $p < 0.05$  when compared with the negative control group † $p < 0.05$  when compared with the positive control group.

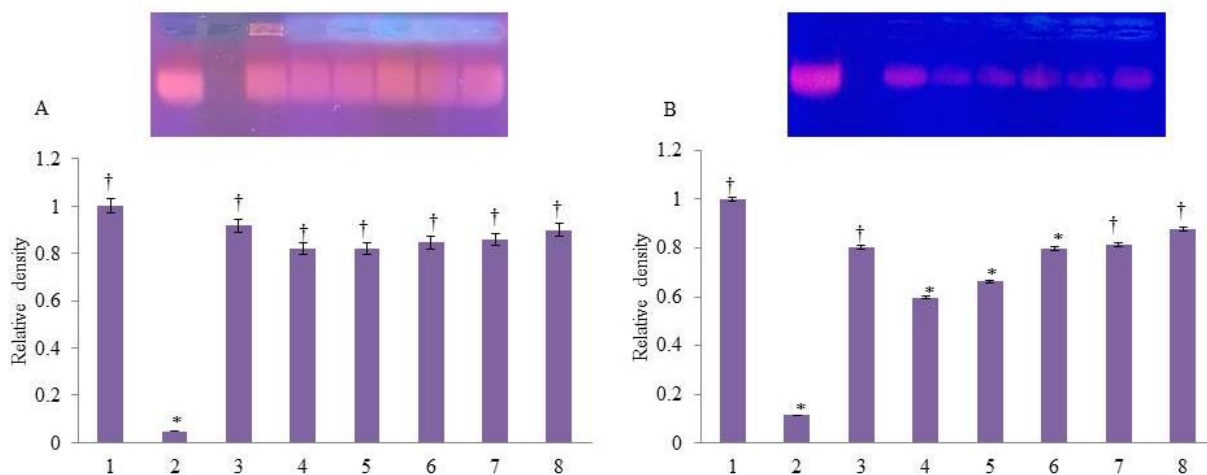

**Figure S29.** Protective effect of Bergamot EO against peroxyl (A) and hydroxyl (B) radicals-induced DNA damage. DNA from salmon sperm (lane 1, negative control), DNA damage control (lane 2, positive control), quercetin (lane 3, 100 µg/mL, standard), essential oils in concentrations of 25, 50, 100, 200, and 400 µg/mL (lanes 4, 5, 6, 7, and 8). \* $p < 0.05$  when compared with the negative control group † $p < 0.05$  when compared with the positive control group.

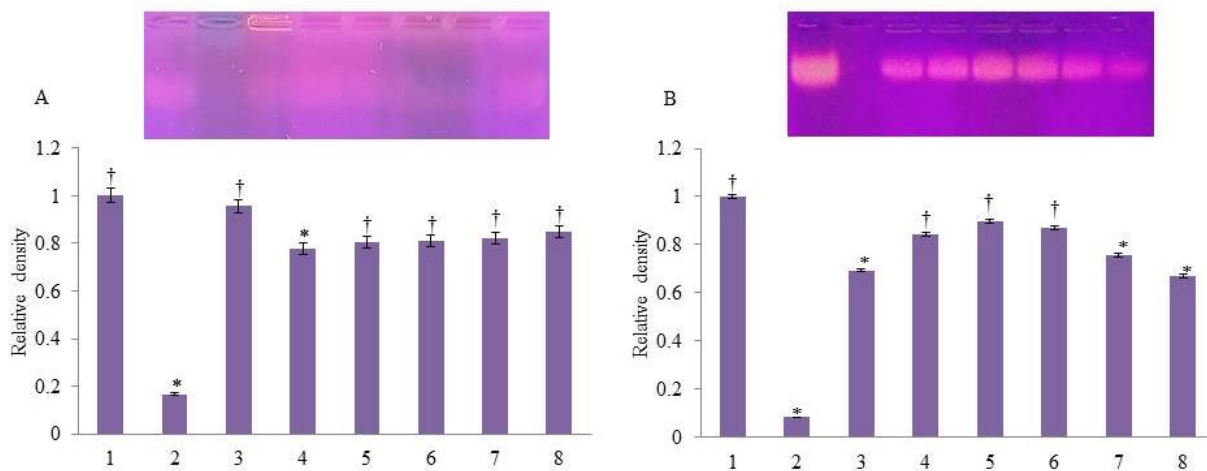

**Figure S30.** Protective effect of Juniper EO against peroxyl (A) and hydroxyl (B) radicals-induced DNA damage. DNA from salmon sperm (lane 1, negative control), DNA damage control (lane 2, positive control), quercetin (lane 3, 100 µg/mL, standard), essential oils in concentrations of 25, 50, 100, 200, and 400 µg/mL (lanes 4, 5, 6, 7, and 8). \* $p < 0.05$  when compared with the negative control group † $p < 0.05$  when compared with the positive control group.

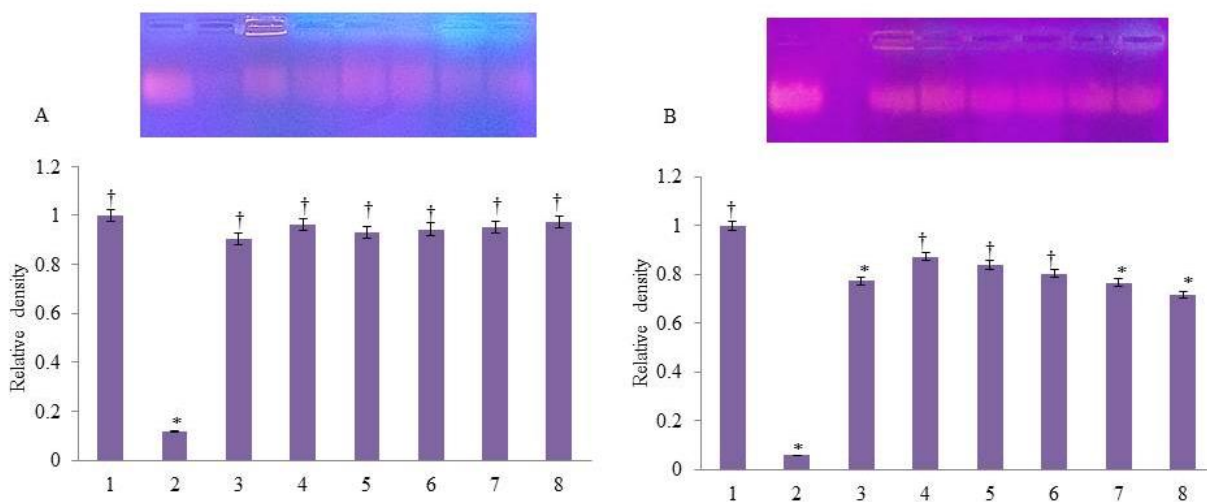

**Figure S31.** Protective effect of Birch EO against peroxyl (A) and hydroxyl (B) radicals-induced DNA damage. DNA from salmon sperm (lane 1, negative control), DNA damage control (lane 2, positive control), quercetin (lane 3, 100 µg/mL, standard), essential oils in concentrations of 25, 50, 100, 200, and 400 µg/mL (lanes 4, 5, 6, 7, and 8). \* $p < 0.05$  when compared with the negative control group † $p < 0.05$  when compared with the positive control group.

standard), essential oils in concentrations of 25, 50, 100, 200, and 400  $\mu\text{g/mL}$  (lanes 4, 5, 6, 7, and 8). \* $p < 0.05$  when compared with the negative control group † $p < 0.05$  when compared with the positive control group.

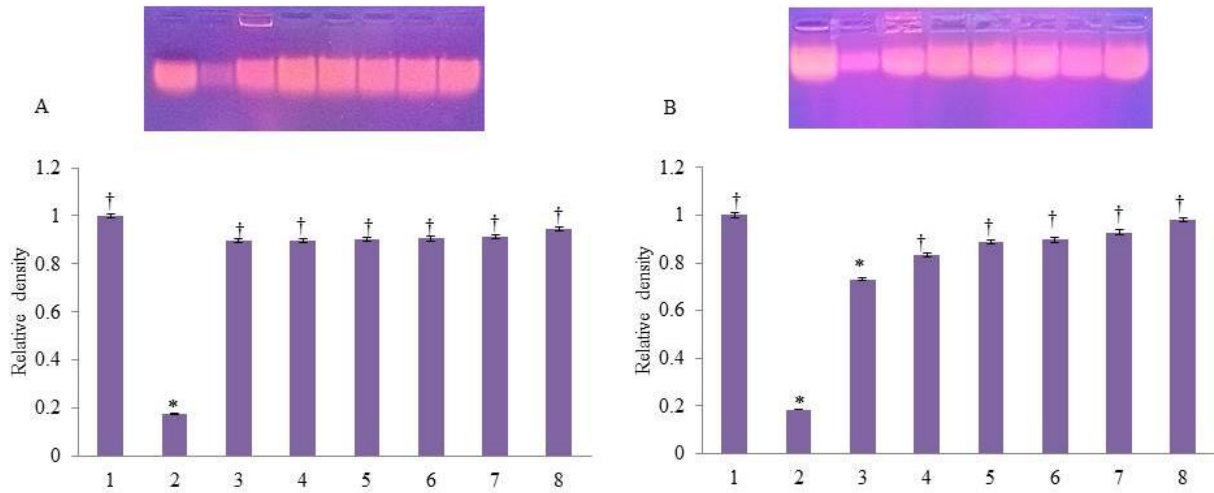

**Figure S32.** Protective effect of Fennel EO against peroxyl (A) and hydroxyl (B) radicals-induced DNA damage. DNA from salmon sperm (lane 1, negative control), DNA damage control (lane 2, positive control), quercetin (lane 3, 100  $\mu\text{g/mL}$ , standard), essential oils in concentrations of 25, 50, 100, 200, and 400  $\mu\text{g/mL}$  (lanes 4, 5, 6, 7, and 8). \* $p < 0.05$  when compared with the negative control group † $p < 0.05$  when compared with the positive control group.

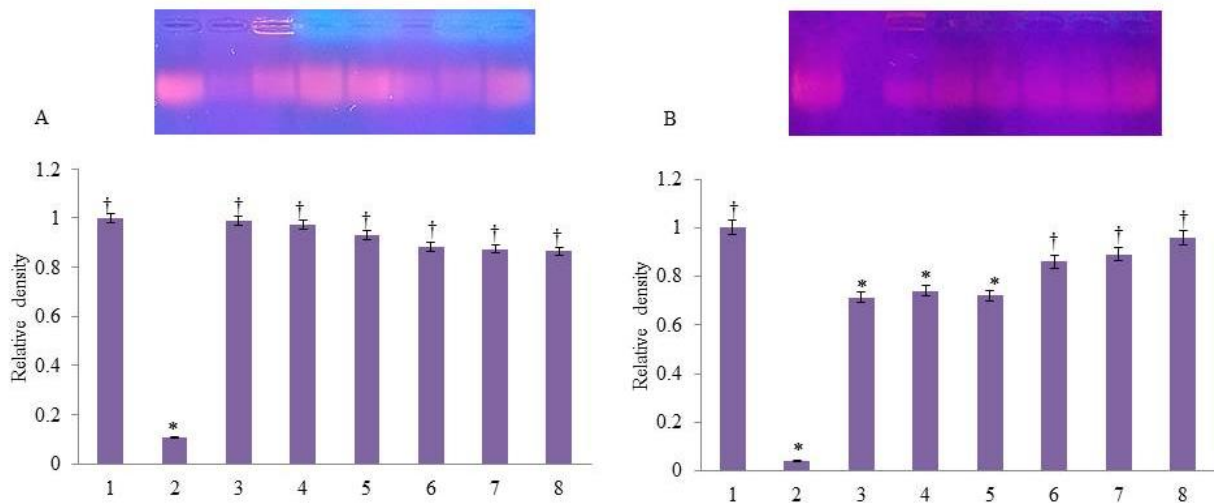

**Figure S33.** Protective effect of Cedar fruit EO against peroxyl (A) and hydroxyl (B) radicals-induced DNA damage. DNA from salmon sperm (lane 1, negative control), DNA damage control (lane 2, positive control), quercetin (lane 3, 100  $\mu\text{g/mL}$ , standard), essential oils in concentrations of 25, 50, 100, 200, and 400  $\mu\text{g/mL}$  (lanes 4, 5, 6, 7, and 8). \* $p < 0.05$  when compared with the negative control group † $p < 0.05$  when compared with the positive control group.

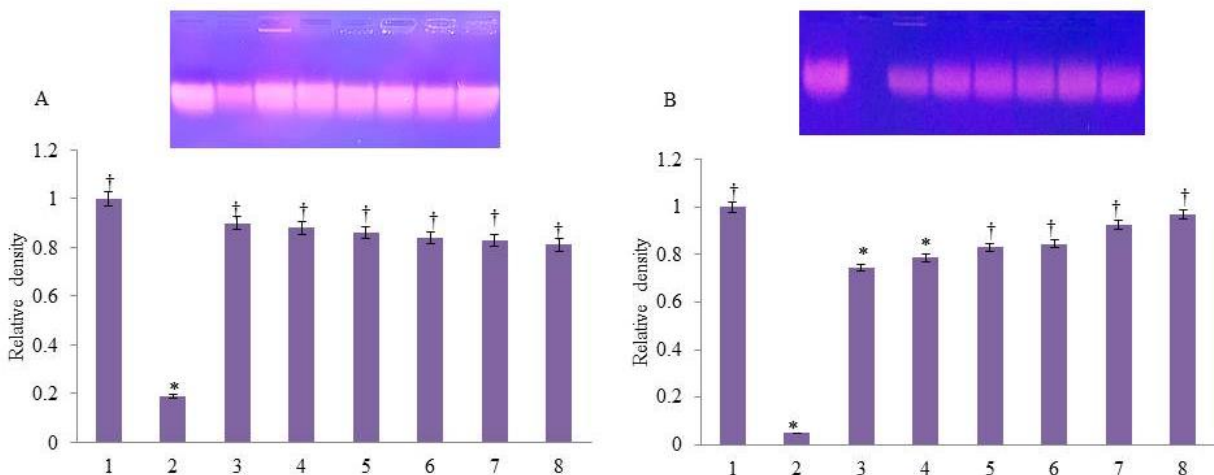

**Figure S34.** Protective effect of Lemon EO against peroxy (A) and hydroxyl (B) radicals-induced DNA damage. DNA from salmon sperm (lane 1, negative control), DNA damage control (lane 2, positive control), quercetin (lane 3, 100  $\mu\text{g/mL}$ , standard), essential oils in concentrations of 25, 50, 100, 200, and 400  $\mu\text{g/mL}$  (lanes 4, 5, 6, 7, and 8). \* $p < 0.05$  when compared with the negative control group † $p < 0.05$  when compared with the positive control group.

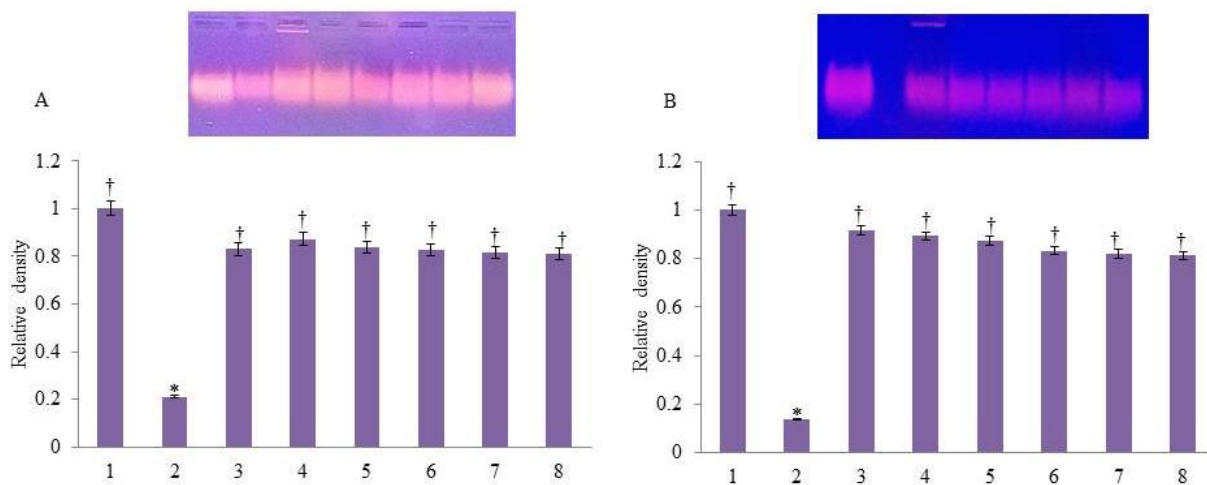

**Figure S35.** Protective effect of Roman chamomile EO against peroxy (A) and hydroxyl (B) radicals-induced DNA damage. DNA from salmon sperm (lane 1, negative control), DNA damage control (lane 2, positive control), quercetin (lane 3, 100  $\mu\text{g/mL}$ , standard), essential oils in concentrations of 25, 50, 100, 200, and 400  $\mu\text{g/mL}$  (lanes 4, 5, 6, 7, and 8). \* $p < 0.05$  when compared with the negative control group † $p < 0.05$  when compared with the positive control group.

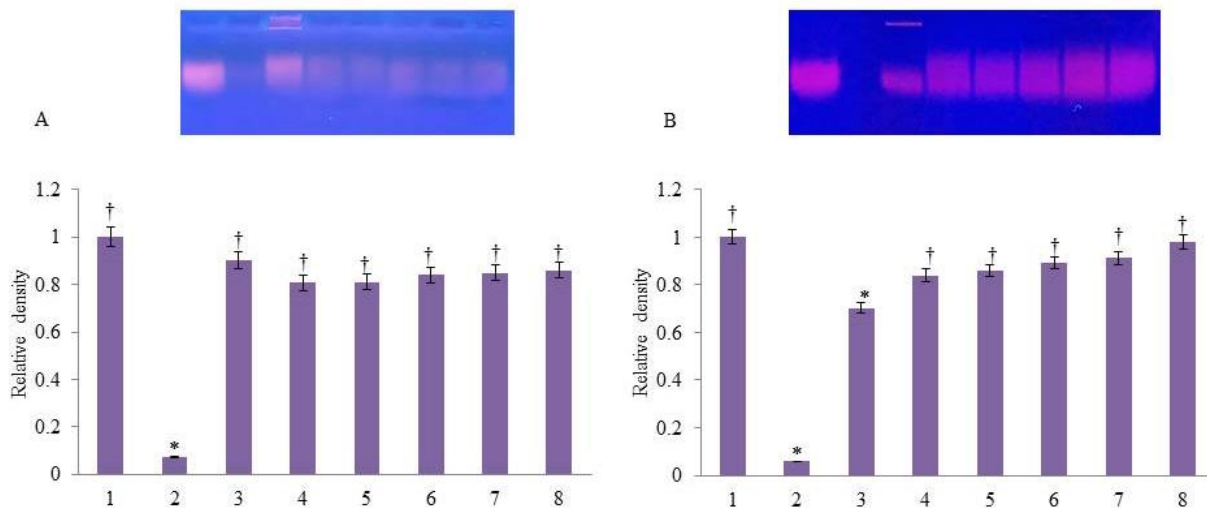

**Figure S36.** Protective effect of Savory EO against peroxy (A) and hydroxyl (B) radicals-induced DNA damage. DNA from salmon sperm (lane 1, negative control), DNA damage control (lane 2, positive control), quercetin (lane 3, 100  $\mu\text{g/mL}$ , standard), essential oils in concentrations of 25, 50, 100, 200, and 400  $\mu\text{g/mL}$  (lanes 4, 5, 6, 7, and 8). \* $p < 0.05$  when compared with the negative control group † $p < 0.05$  when compared with the positive control group.

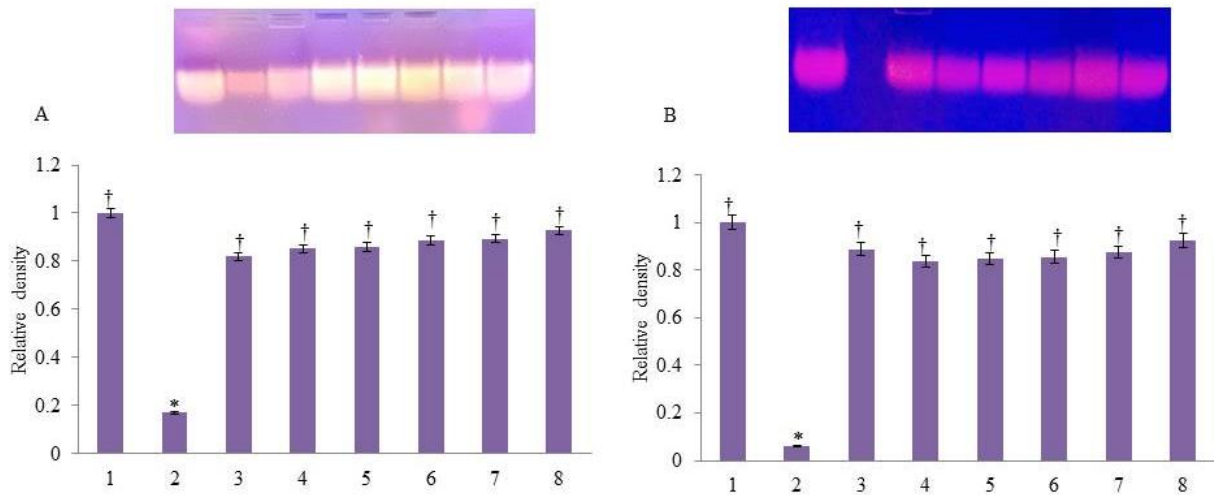

**Figure S37.** Protective effect of Rosemary EO against peroxyl (A) and hydroxyl (B) radicals-induced DNA damage. DNA from salmon sperm (lane 1, negative control), DNA damage control (lane 2, positive control), quercetin (lane 3, 100 µg/mL, standard), essential oils in concentrations of 25, 50, 100, 200, and 400 µg/mL (lanes 4, 5, 6, 7, and 8). \* $p < 0.05$  when compared with the negative control group † $p < 0.05$  when compared with the positive control group.

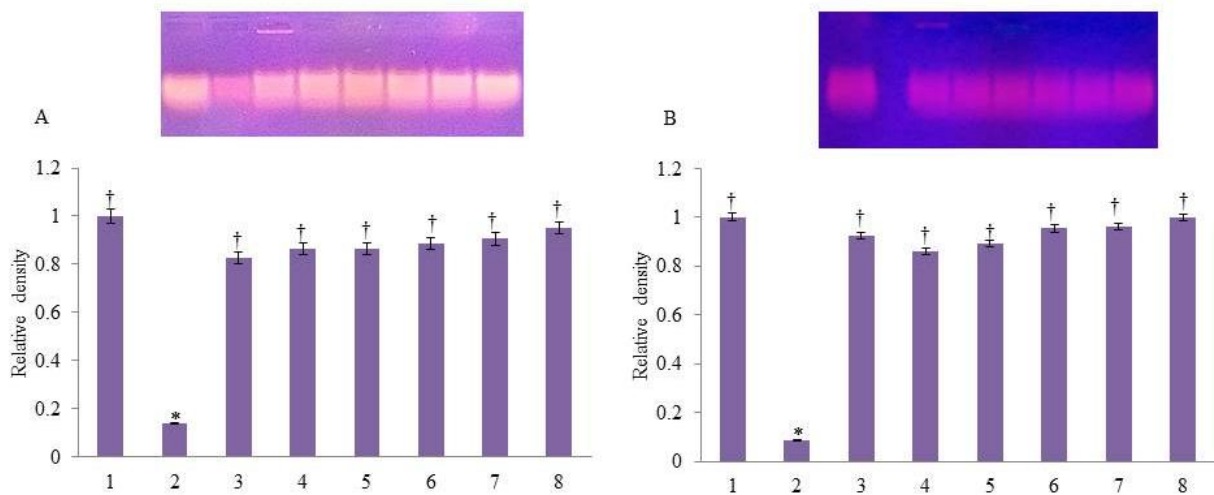

**Figure S38.** Protective effect of *Eucalyptus globulus* EO against peroxyl (A) and hydroxyl (B) radicals-induced DNA damage. DNA from salmon sperm (lane 1, negative control), DNA damage control (lane 2, positive control), quercetin (lane 3, 100 µg/mL, standard), essential oils in concentrations of 25, 50, 100, 200, and 400 µg/mL (lanes 4, 5, 6, 7, and 8). \* $p < 0.05$  when compared with the negative control group † $p < 0.05$  when compared with the positive control group.

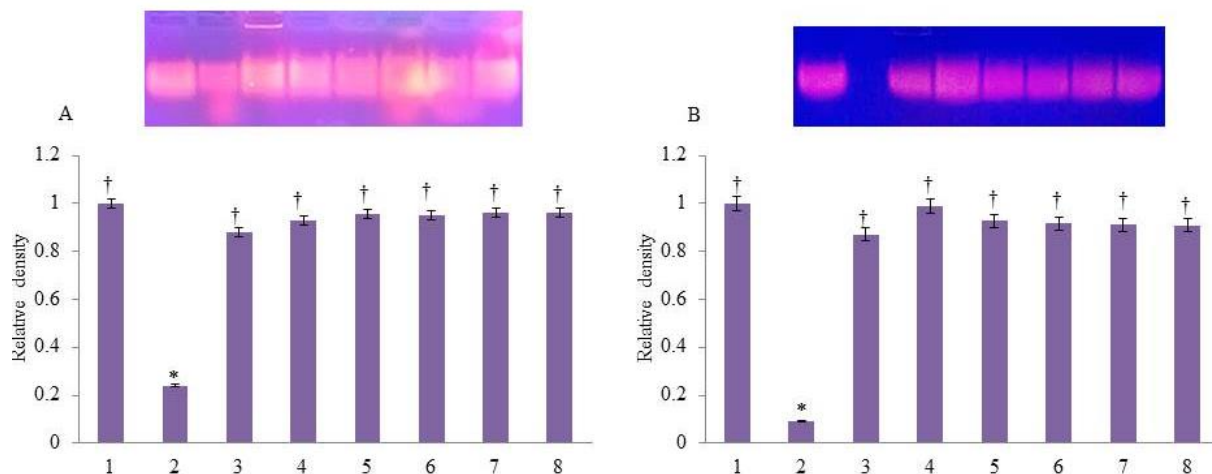

**Figure S39.** Protective effect of Orange sweet EO against peroxyl (A) and hydroxyl (B) radicals-induced DNA damage. DNA from salmon sperm (lane 1, negative control), DNA damage control (lane 2, positive control), quercetin (lane 3, 100

µg/mL, standard), essential oils in concentrations of 25, 50, 100, 200, and 400 µg/mL (lanes 4, 5, 6, 7, and 8). \*p < 0.05 when compared with the negative control group †p < 0.05 when compared with the positive control group.

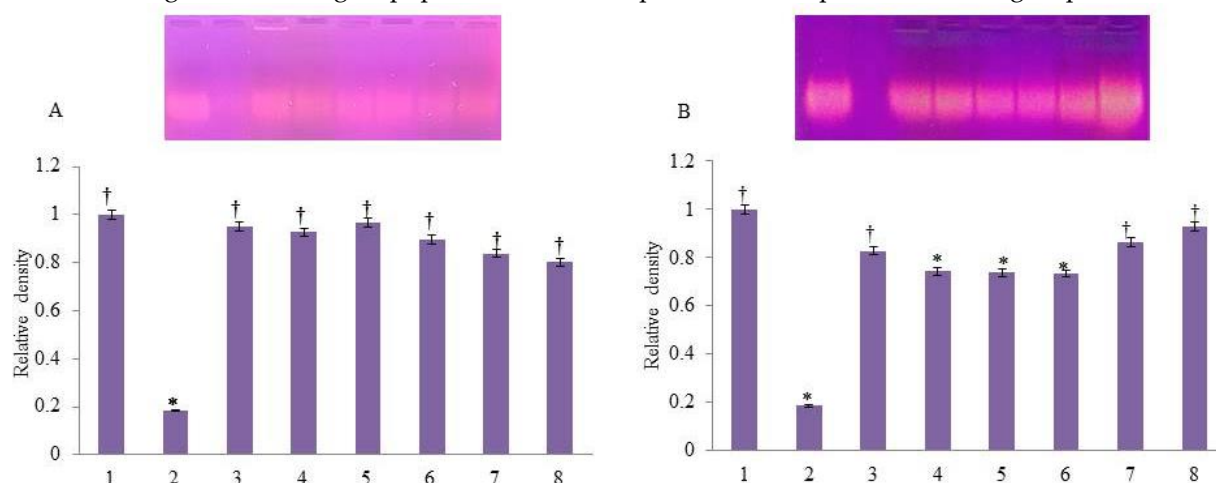

**Figure S40.** Protective effect of Niaouly EO against peroxyl (A) and hydroxyl (B) radicals-induced DNA damage. DNA from salmon sperm (lane 1, negative control), DNA damage control (lane 2, positive control), quercetin (lane 3, 100 µg/mL, standard), essential oils in concentrations of 25, 50, 100, 200, and 400 µg/mL (lanes 4, 5, 6, 7, and 8). \*p < 0.05 when compared with the negative control group †p < 0.05 when compared with the positive control group.

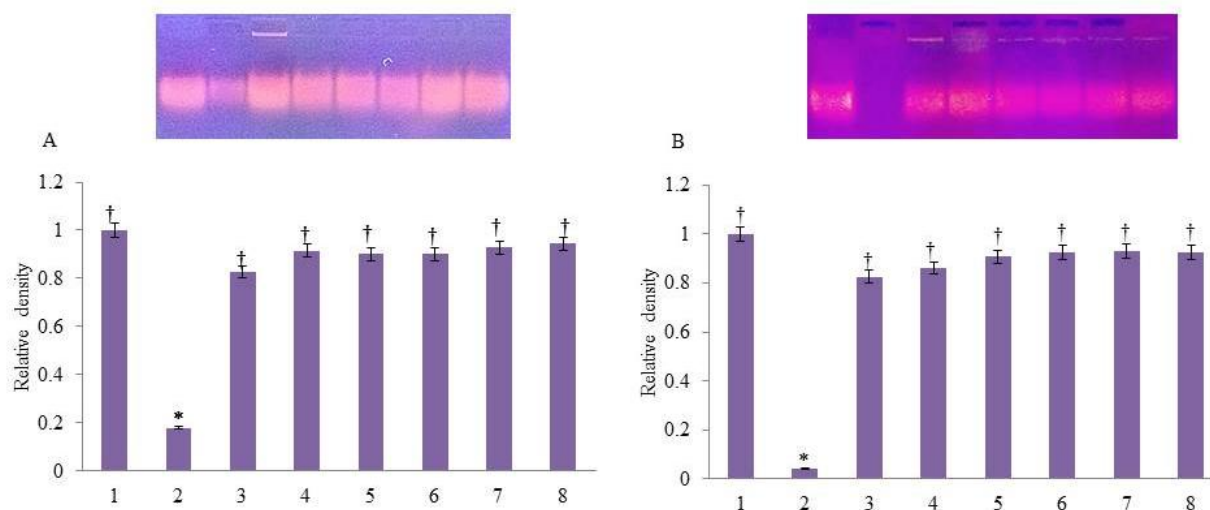

**Figure S41.** Protective effect of Artemisia EO against peroxyl (A) and hydroxyl (B) radicals-induced DNA damage. DNA from salmon sperm (lane 1, negative control), DNA damage control (lane 2, positive control), quercetin (lane 3, 100 µg/mL, standard), essential oils in concentrations of 25, 50, 100, 200, and 400 µg/mL (lanes 4, 5, 6, 7, and 8). \*p < 0.05 when compared with the negative control group †p < 0.05 when compared with the positive control group.

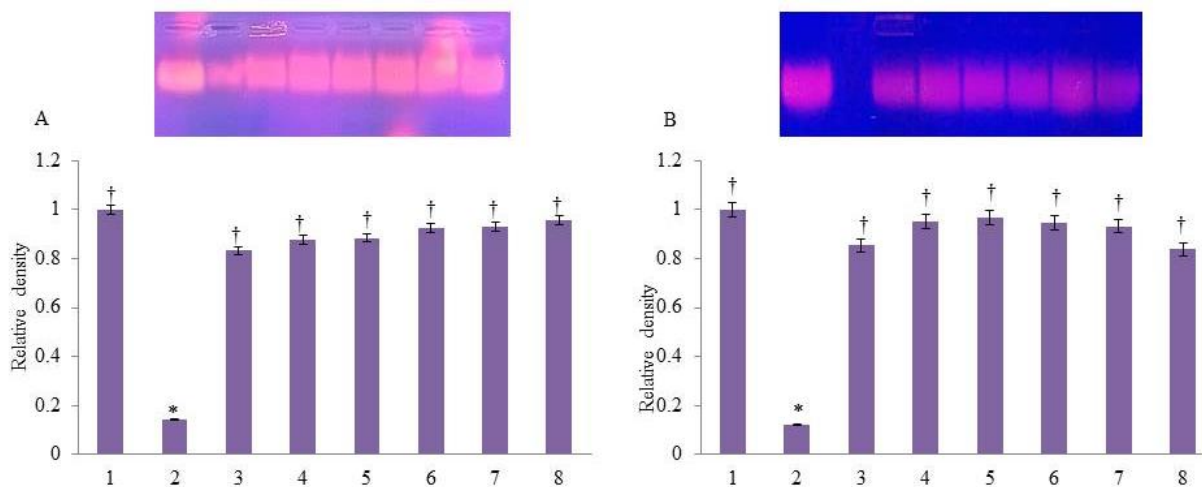

**Figure S42.** Protective effect of Cajeput EO against peroxy (A) and hydroxyl (B) radicals-induced DNA damage. DNA from salmon sperm (lane 1, negative control), DNA damage control (lane 2, positive control), quercetin (lane 3, 100  $\mu\text{g/mL}$ , standard), essential oils in concentrations of 25, 50, 100, 200, and 400  $\mu\text{g/mL}$  (lanes 4, 5, 6, 7, and 8). \* $p < 0.05$  when compared with the negative control group † $p < 0.05$  when compared with the positive control group.

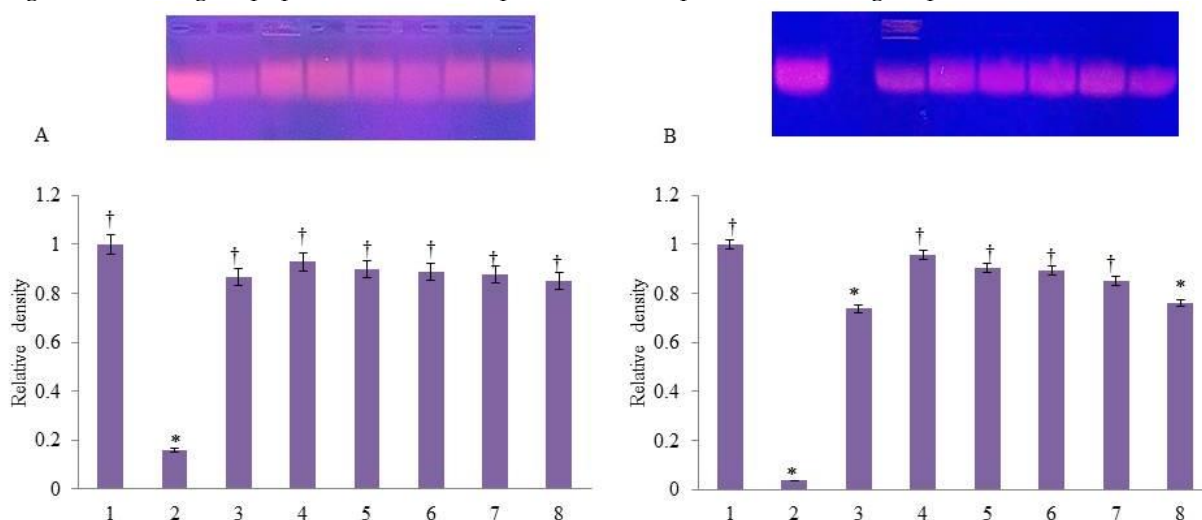

**Figure S43.** Protective effect of Black pepper EO against peroxy (A) and hydroxyl (B) radicals-induced DNA damage. DNA from salmon sperm (lane 1, negative control), DNA damage control (lane 2, positive control), quercetin (lane 3, 100  $\mu\text{g/mL}$ , standard), essential oils in concentrations of 25, 50, 100, 200, and 400  $\mu\text{g/mL}$  (lanes 4, 5, 6, 7, and 8). \* $p < 0.05$  when compared with the negative control group † $p < 0.05$  when compared with the positive control group.

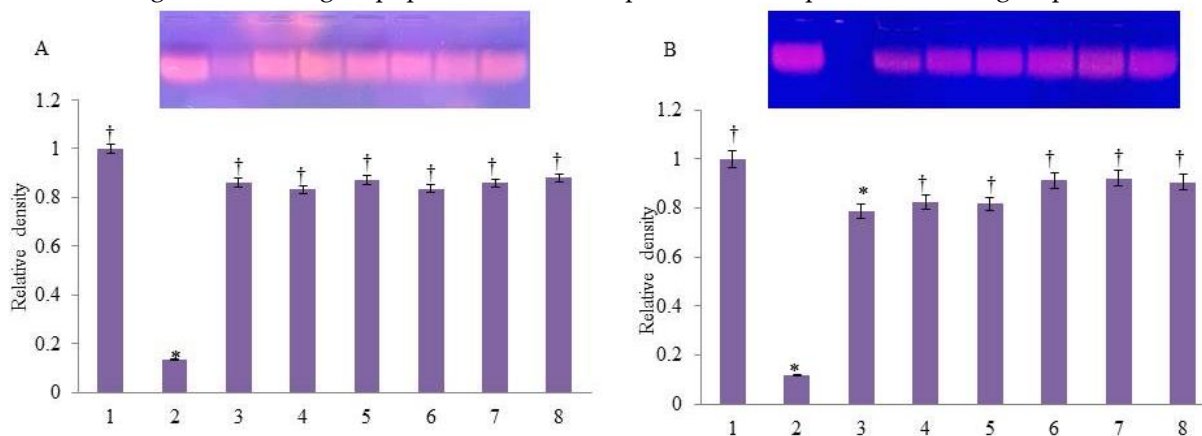

**Figure S44.** Protective effect of White thyme EO against peroxy (A) and hydroxyl (B) radicals-induced DNA damage. DNA from salmon sperm (lane 1, negative control), DNA damage control (lane 2, positive control), quercetin (lane 3, 100  $\mu\text{g/mL}$ , standard), essential oils in concentrations of 25, 50, 100, 200, and 400  $\mu\text{g/mL}$  (lanes 4, 5, 6, 7, and 8). \* $p < 0.05$  when compared with the negative control group † $p < 0.05$  when compared with the positive control group.

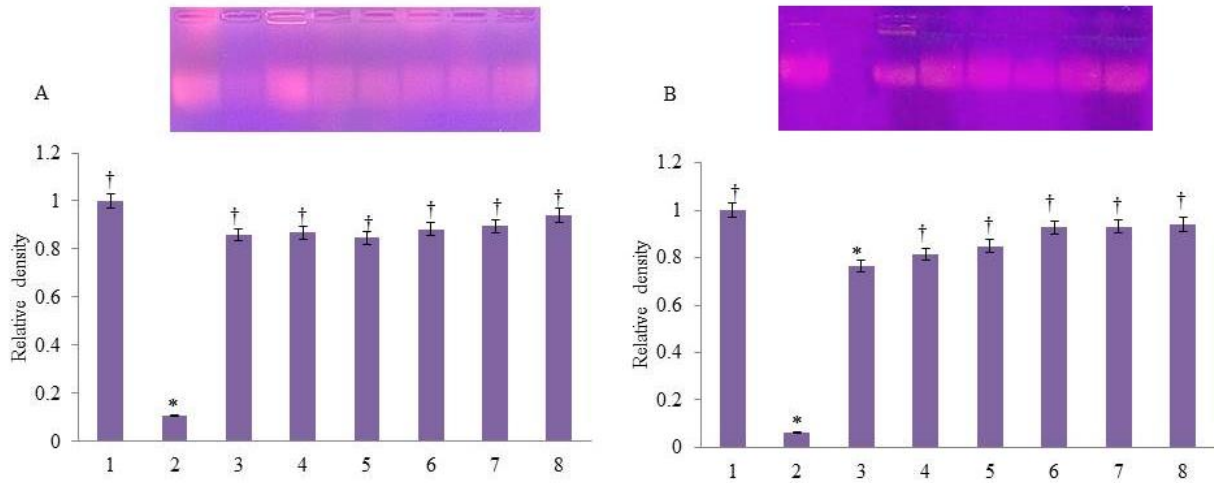

**Figure S45.** Protective effect of Marjoram EO against peroxyl (A) and hydroxyl (B) radicals-induced DNA damage. DNA from salmon sperm (lane 1, negative control), DNA damage control (lane 2, positive control), quercetin (lane 3, 100  $\mu\text{g/mL}$ , standard), essential oils in concentrations of 25, 50, 100, 200, and 400  $\mu\text{g/mL}$  (lanes 4, 5, 6, 7, and 8). \* $p < 0.05$  when compared with the negative control group † $p < 0.05$  when compared with the positive control group.

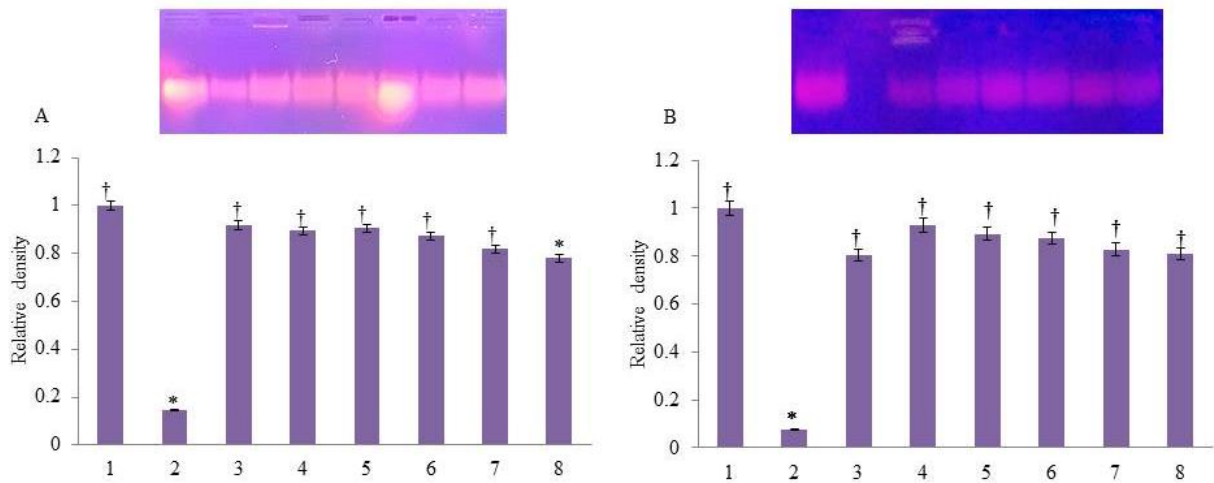

**Figure S46.** Protective effect of Clove EO against peroxyl (A) and hydroxyl (B) radicals-induced DNA damage. DNA from salmon sperm (lane 1, negative control), DNA damage control (lane 2, positive control), quercetin (lane 3, 100  $\mu\text{g/mL}$ , standard), essential oils in concentrations of 25, 50, 100, 200, and 400  $\mu\text{g/mL}$  (lanes 4, 5, 6, 7, and 8). \* $p < 0.05$  when compared with the negative control group † $p < 0.05$  when compared with the positive control group.

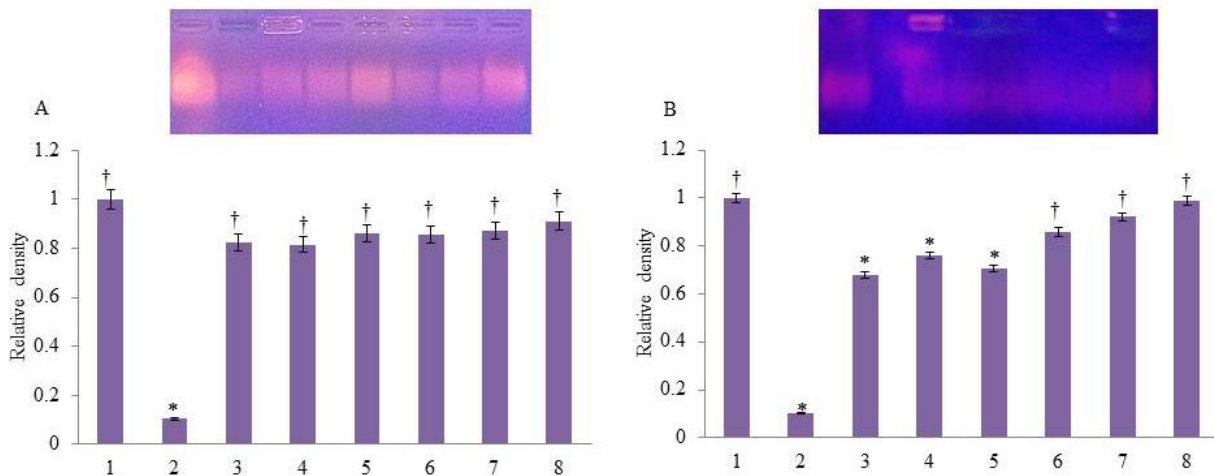

**Figure S47.** Protective effect of Cypress EO against peroxyl (A) and hydroxyl (B) radicals-induced DNA damage. DNA from salmon sperm (lane 1, negative control), DNA damage control (lane 2, positive control), quercetin (lane 3, 100  $\mu\text{g/mL}$ , standard), essential oils in concentrations of 25, 50, 100, 200, and 400  $\mu\text{g/mL}$  (lanes 4, 5, 6, 7, and 8). \* $p < 0.05$  when compared with the negative control group † $p < 0.05$  when compared with the positive control group.

standard), essential oils in concentrations of 25, 50, 100, 200, and 400  $\mu\text{g/mL}$  (lanes 4, 5, 6, 7, and 8). \* $p < 0.05$  when compared with the negative control group † $p < 0.05$  when compared with the positive control group.

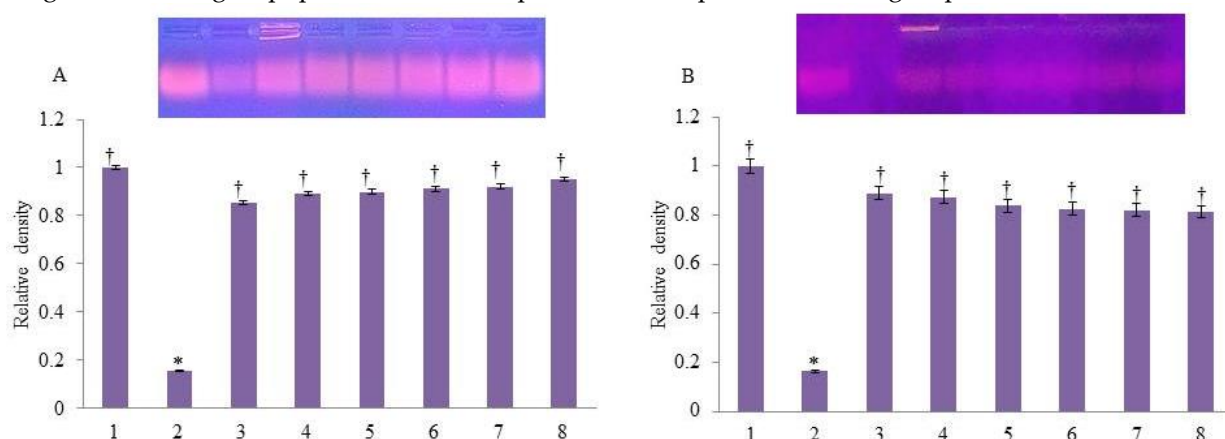

**Figure S48.** Protective effect of Nutmeg natural EO against peroxyl (A) and hydroxyl (B) radicals-induced DNA damage. DNA from salmon sperm (lane 1, negative control), DNA damage control (lane 2, positive control), quercetin (lane 3, 100  $\mu\text{g/mL}$ , standard), essential oils in concentrations of 25, 50, 100, 200, and 400  $\mu\text{g/mL}$  (lanes 4, 5, 6, 7, and 8). \* $p < 0.05$  when compared with the negative control group † $p < 0.05$  when compared with the positive control group.

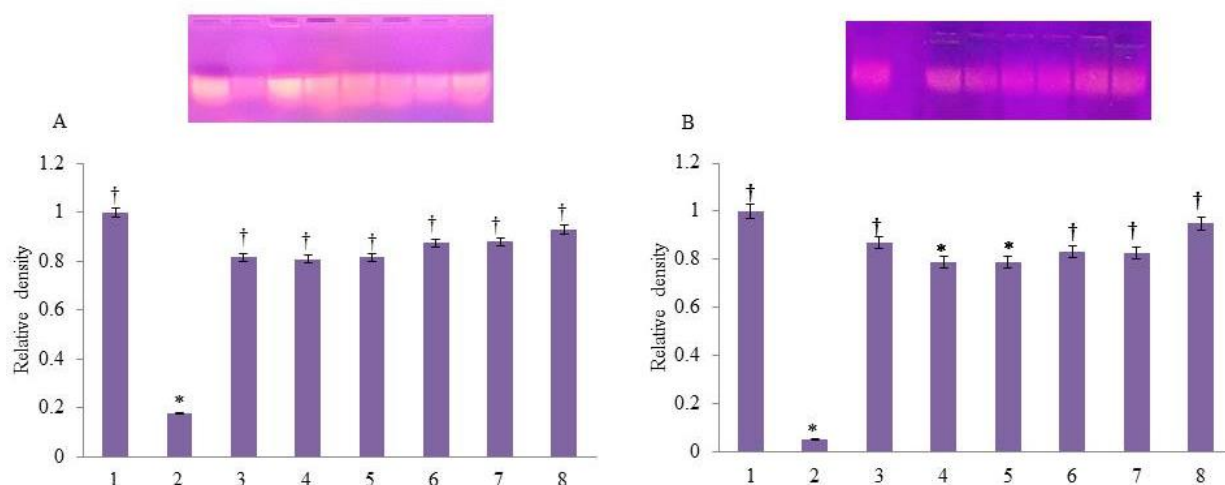

**Figure S49.** Protective effect of Peppermint EO against peroxyl (A) and hydroxyl (B) radicals-induced DNA damage. DNA from salmon sperm (lane 1, negative control), DNA damage control (lane 2, positive control), quercetin (lane 3, 100  $\mu\text{g/mL}$ , standard), essential oils in concentrations of 25, 50, 100, 200, and 400  $\mu\text{g/mL}$  (lanes 4, 5, 6, 7, and 8). \* $p < 0.05$  when compared with the negative control group † $p < 0.05$  when compared with the positive control group.

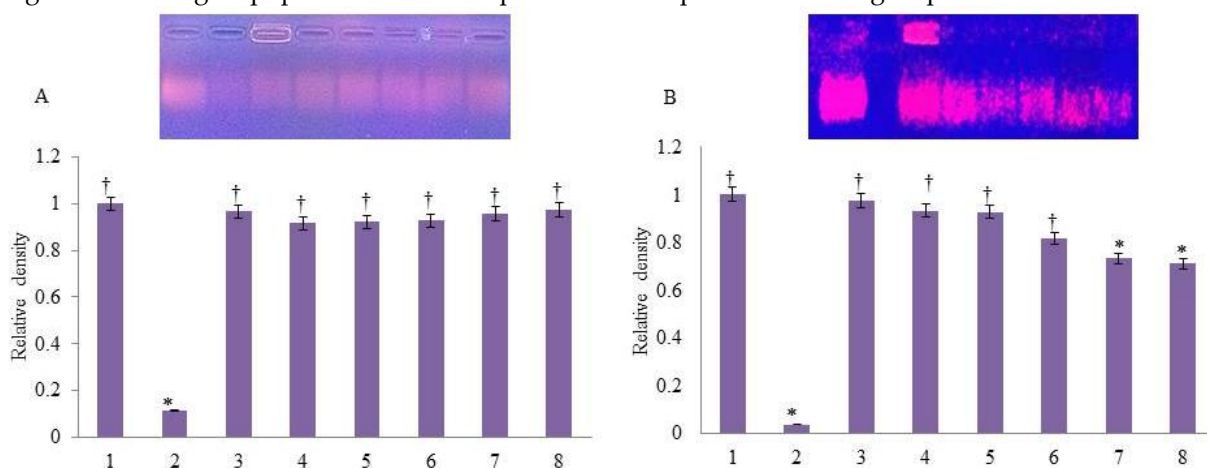

**Figure S50.** Protective effect of Verbena EO against peroxyl (A) and hydroxyl (B) radicals-induced DNA damage. DNA from salmon sperm (lane 1, negative control), DNA damage control (lane 2, positive control), quercetin (lane 3, 100  $\mu\text{g/mL}$ , standard), essential oils in concentrations of 25, 50, 100, 200, and 400  $\mu\text{g/mL}$  (lanes 4, 5, 6, 7, and 8). \* $p < 0.05$  when compared with the negative control group † $p < 0.05$  when compared with the positive control group.

standard), essential oils in concentrations of 25, 50, 100, 200, and 400  $\mu\text{g/mL}$  (lanes 4, 5, 6, 7, and 8). \* $p < 0.05$  when compared with the negative control group † $p < 0.05$  when compared with the positive control group.

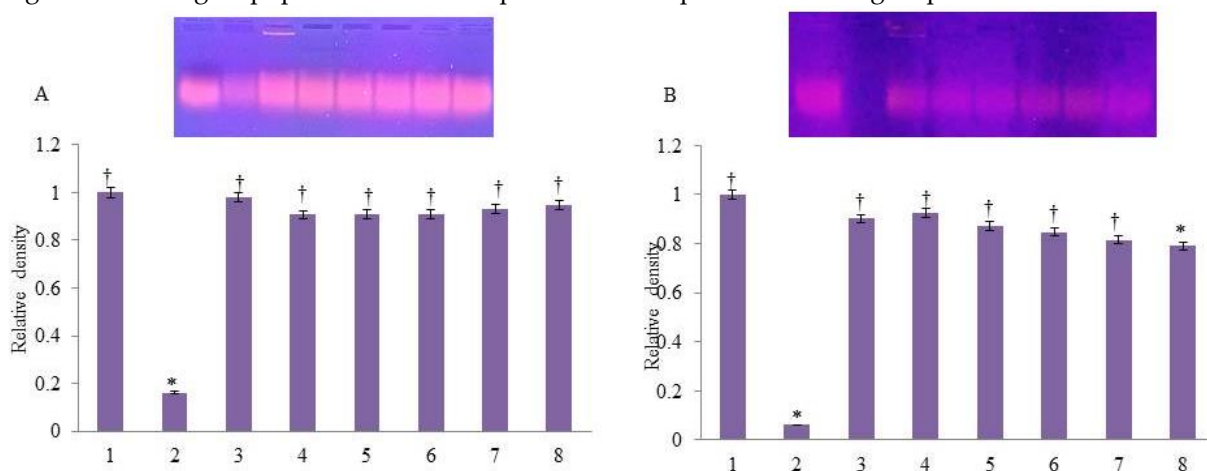

**Figure S51.** Protective effect of Basil EO against peroxyl (A) and hydroxyl (B) radicals-induced DNA damage. DNA from salmon sperm (lane 1, negative control), DNA damage control (lane 2, positive control), quercetin (lane 3, 100  $\mu\text{g/mL}$ , standard), essential oils in concentrations of 25, 50, 100, 200, and 400  $\mu\text{g/mL}$  (lanes 4, 5, 6, 7, and 8). \* $p < 0.05$  when compared with the negative control group † $p < 0.05$  when compared with the positive control group.

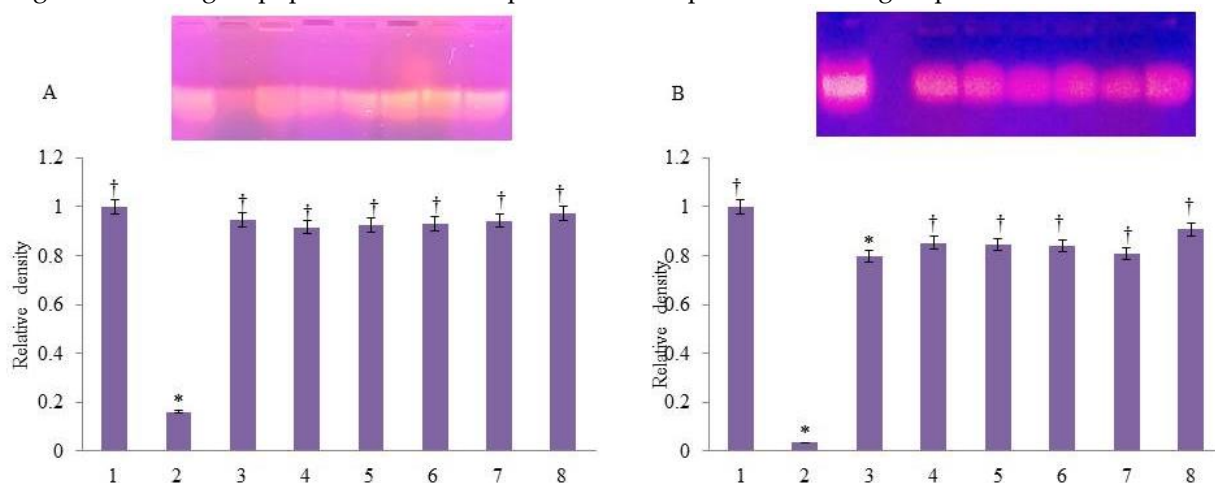

**Figure S52.** Protective effect of Palmarosa EO against peroxyl (A) and hydroxyl (B) radicals-induced DNA damage. DNA from salmon sperm (lane 1, negative control), DNA damage control (lane 2, positive control), quercetin (lane 3, 100  $\mu\text{g/mL}$ , standard), essential oils in concentrations of 25, 50, 100, 200, and 400  $\mu\text{g/mL}$  (lanes 4, 5, 6, 7, and 8). \* $p < 0.05$  when compared with the negative control group † $p < 0.05$  when compared with the positive control group.

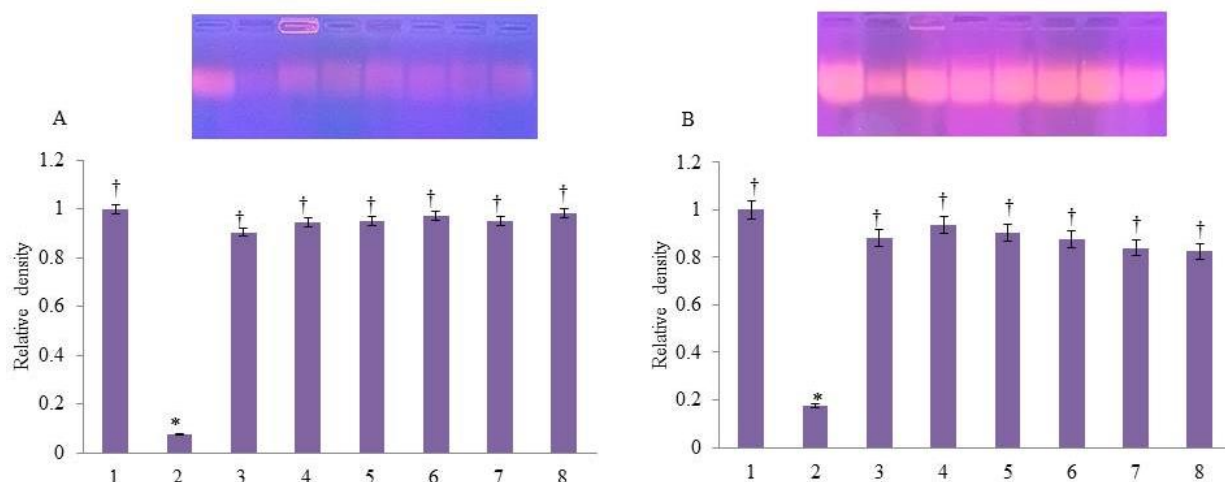

**Figure S53.** Protective effect of Laurel EO against peroxyl (A) and hydroxyl (B) radicals-induced DNA damage. DNA from salmon sperm (lane 1, negative control), DNA damage control (lane 2, positive control), quercetin (lane 3, 100  $\mu\text{g/mL}$ , standard), essential oils in concentrations of 25, 50, 100, 200, and 400  $\mu\text{g/mL}$  (lanes 4, 5, 6, 7, and 8). \* $p < 0.05$  when compared with the negative control group † $p < 0.05$  when compared with the positive control group.

standard), essential oils in concentrations of 25, 50, 100, 200, and 400 µg/mL (lanes 4, 5, 6, 7, and 8). \*p < 0.05 when compared with the negative control group †p < 0.05 when compared with the positive control group.

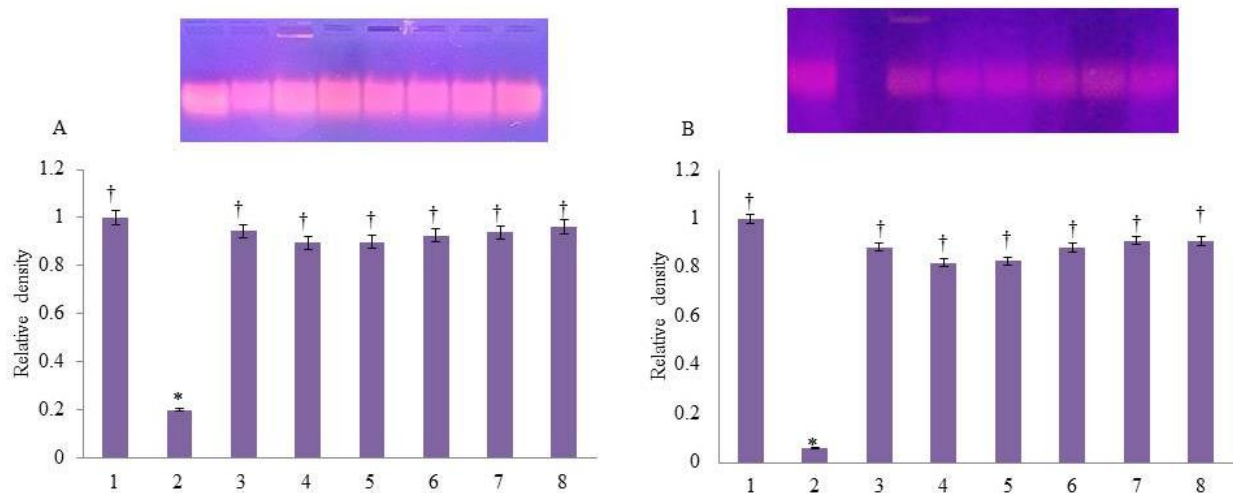

**Figure S54.** Protective effect of Narural anise pure EO against peroxyl (A) and hydroxyl (B) radicals-induced DNA damage. DNA from salmon sperm (lane 1, negative control), DNA damage control (lane 2, positive control), quercetin (lane 3, 100 µg/mL, standard), essential oils in concentrations of 25, 50, 100, 200, and 400 µg/mL (lanes 4, 5, 6, 7, and 8). \*p < 0.05 when compared with the negative control group †p < 0.05 when compared with the positive control group.

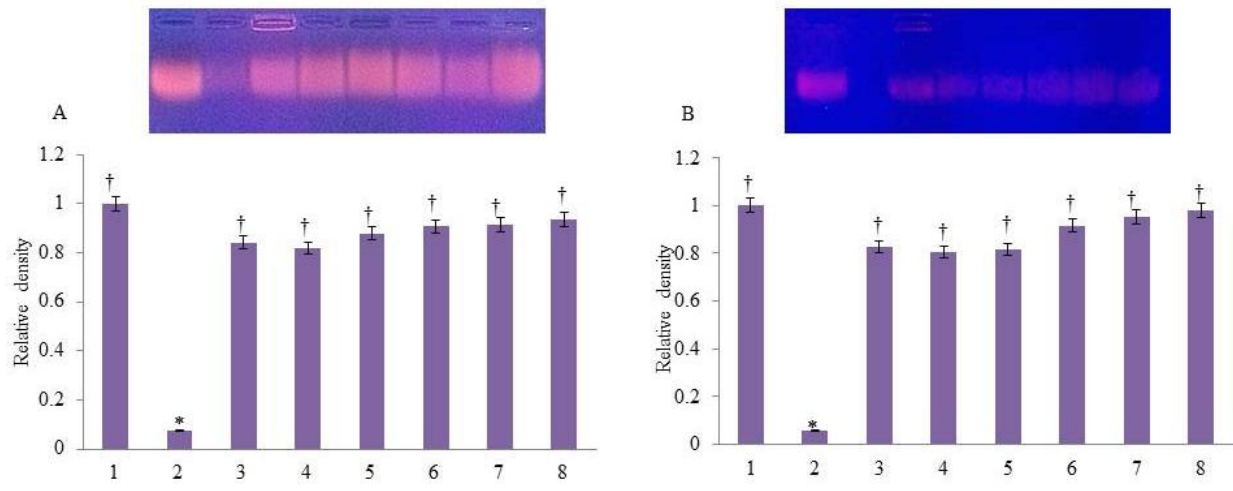

**Figure S55.** Protective effect of Incense EO against peroxyl (A) and hydroxyl (B) radicals-induced DNA damage. DNA from salmon sperm (lane 1, negative control), DNA damage control (lane 2, positive control), quercetin (lane 3, 100 µg/mL, standard), essential oils in concentrations of 25, 50, 100, 200, and 400 µg/mL (lanes 4, 5, 6, 7, and 8). \*p < 0.05 when compared with the negative control group †p < 0.05 when compared with the positive control group.

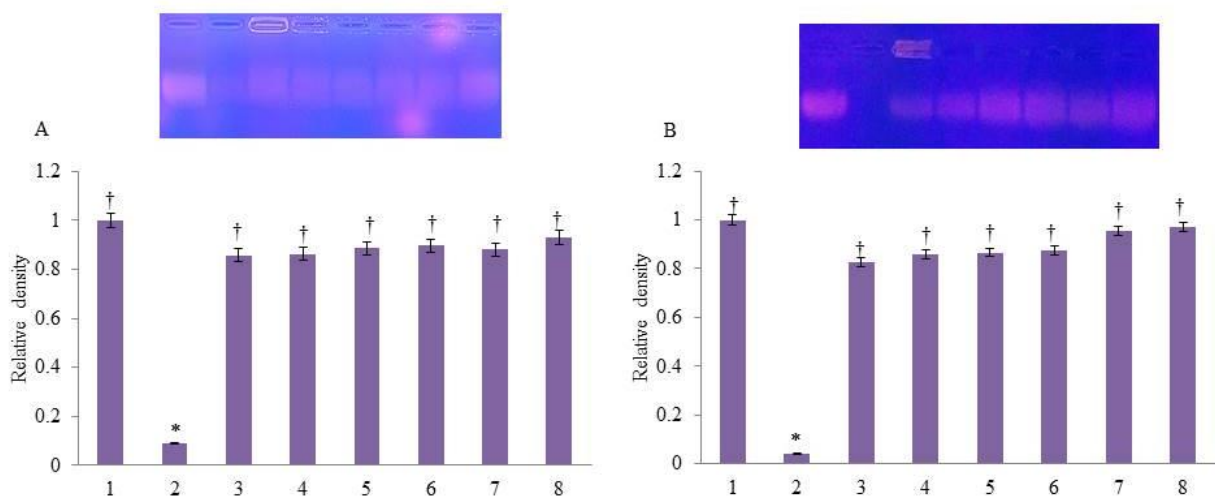

**Figure S56.** Protective effect of *Mentha suaveolens* EO against peroxy (A) and hydroxyl (B) radicals-induced DNA damage. DNA from salmon sperm (lane 1, negative control), DNA damage control (lane 2, positive control), quercetin (lane 3, 100  $\mu\text{g/mL}$ , standard), essential oils in concentrations of 25, 50, 100, 200, and 400  $\mu\text{g/mL}$  (lanes 4, 5, 6, 7, and 8). \* $p < 0.05$  when compared with the negative control group  $^{\dagger}p < 0.05$  when compared with the positive control group.

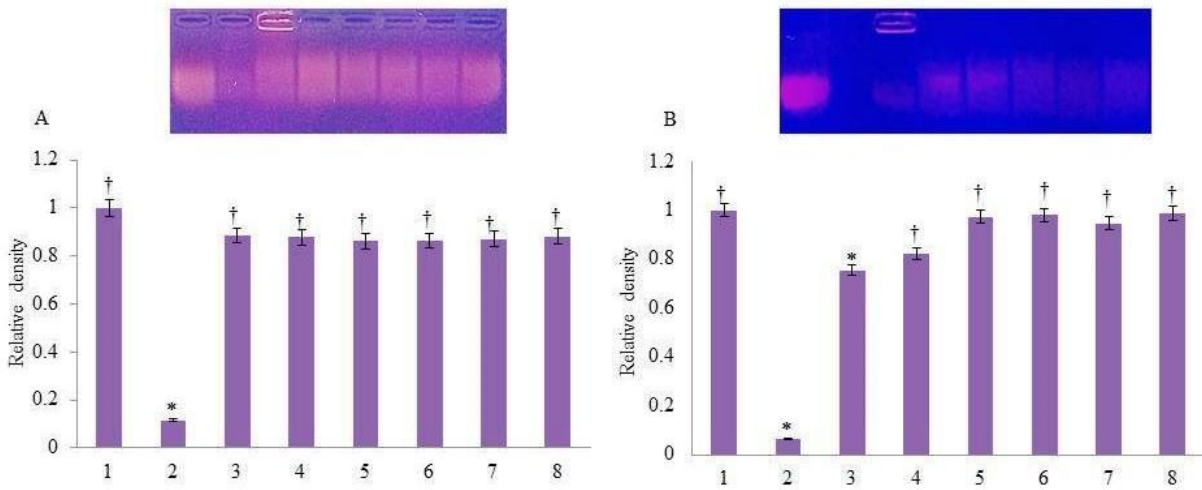

**Figure S57.** Protective effect of *Coridothymus capitatus* EO against peroxy (A) and hydroxyl (B) radicals-induced DNA damage. DNA from salmon sperm (lane 1, negative control), DNA damage control (lane 2, positive control), quercetin (lane 3, 100  $\mu\text{g/mL}$ , standard), essential oils in concentrations of 25, 50, 100, 200, and 400  $\mu\text{g/mL}$  (lanes 4, 5, 6, 7, and 8). \* $p < 0.05$  when compared with the negative control group  $^{\dagger}p < 0.05$  when compared with the positive control group.

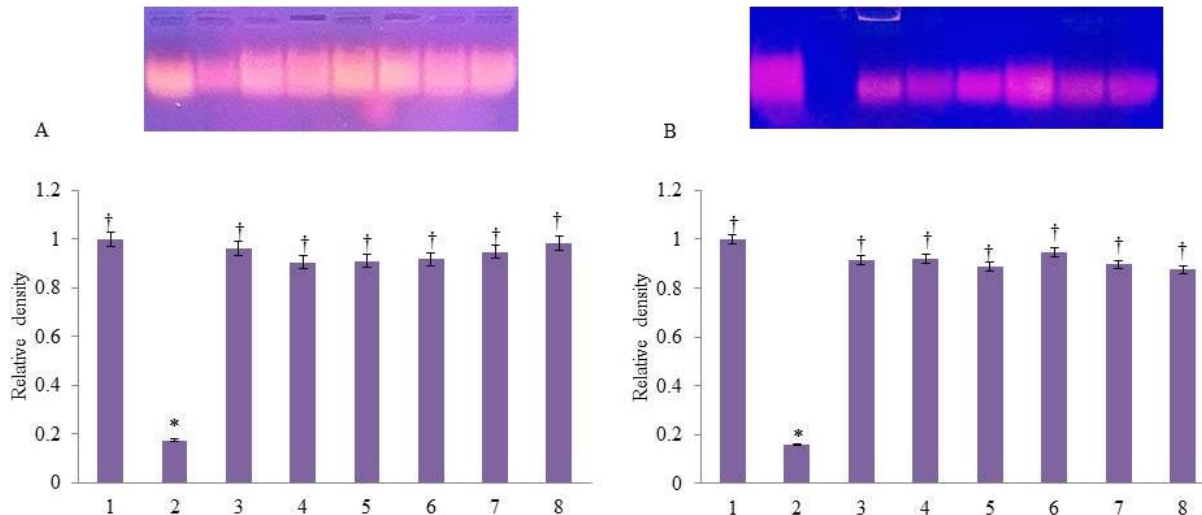

**Figure S58.** Protective effect of *Thymus vulgaris* EO against peroxy (A) and hydroxyl (B) radicals-induced DNA damage. DNA from salmon sperm (lane 1, negative control), DNA damage control (lane 2, positive control), quercetin (lane 3, 100  $\mu\text{g/mL}$ , standard), essential oils in concentrations of 25, 50, 100, 200, and 400  $\mu\text{g/mL}$  (lanes 4, 5, 6, 7, and 8). \* $p < 0.05$  when compared with the negative control group  $^{\dagger}p < 0.05$  when compared with the positive control group.

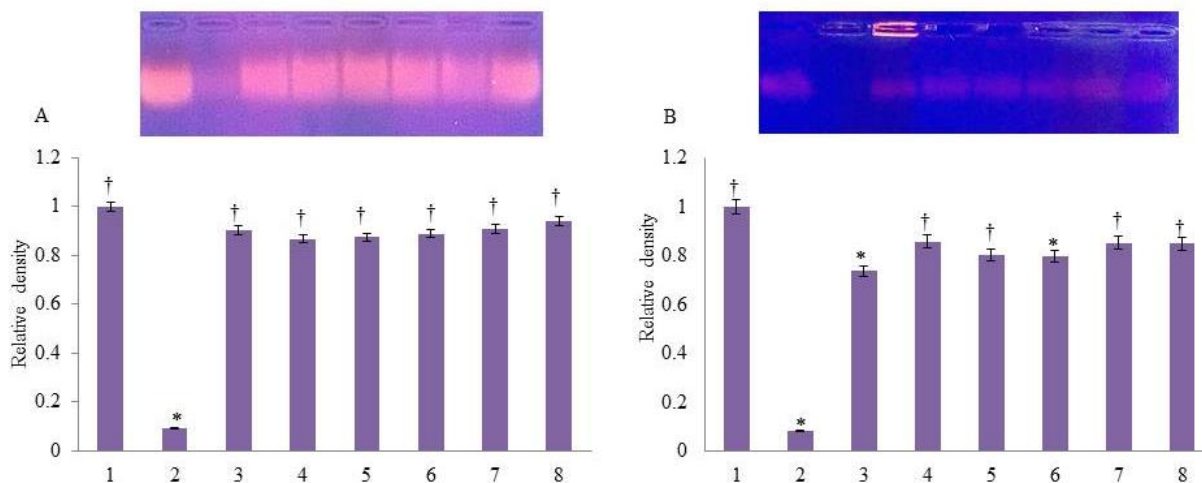

**Figure S59.** Protective effect of *Origanum hirtum* EO against peroxyl (A) and hydroxyl (B) radicals-induced DNA damage. DNA from salmon sperm (lane 1, negative control), DNA damage control (lane 2, positive control), quercetin (lane 3, 100 µg/mL, standard), essential oils in concentrations of 25, 50, 100, 200, and 400 µg/mL (lanes 4, 5, 6, 7, and 8). \* $p < 0.05$  when compared with the negative control group † $p < 0.05$  when compared with the positive control group.

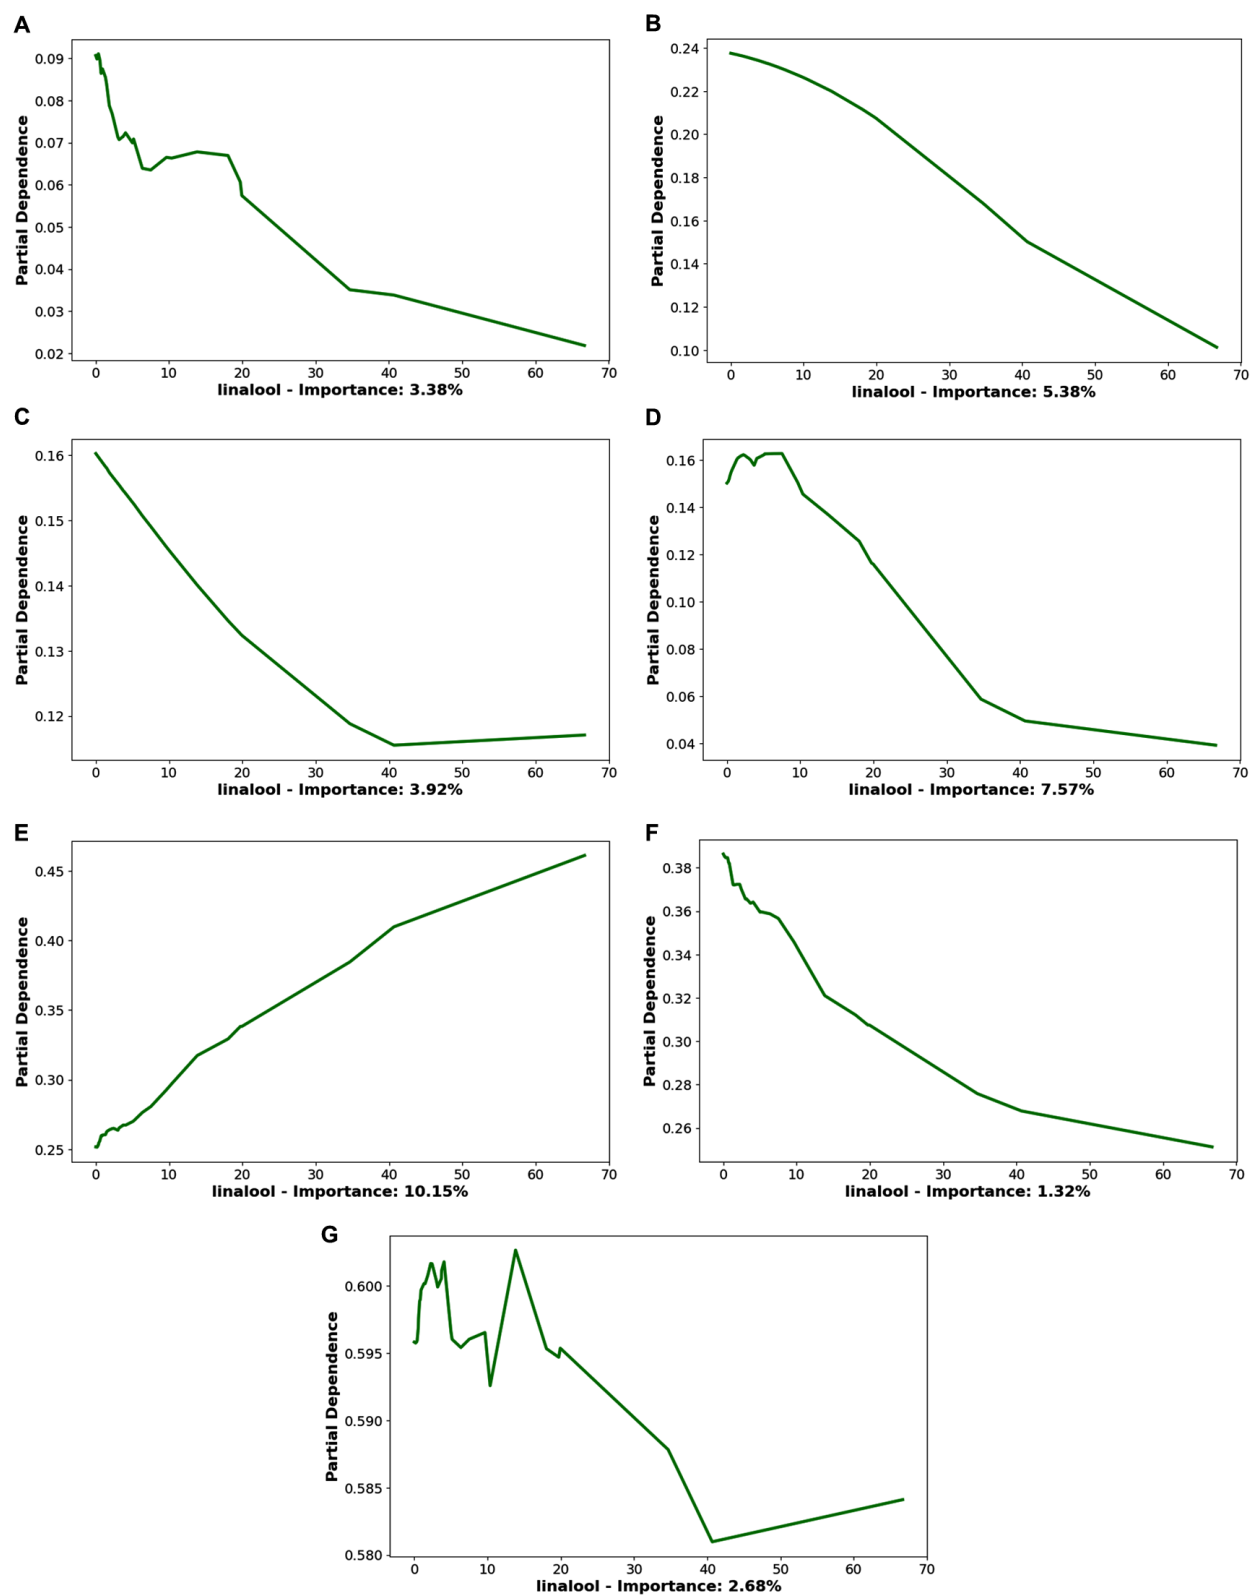

**Figure S60.** Partial dependence graphs of **limonene** in the model of  $M^{n+}$  (A),  $DPPH^{\bullet}$  (B),  $LOO^{\bullet}$  (C),  $ABTS^{\bullet+}$  (D),  $OH^{\bullet}$  (E),  $ROO-RBD_{50}$  (F),  $HO-RBD_{50}$  (G).

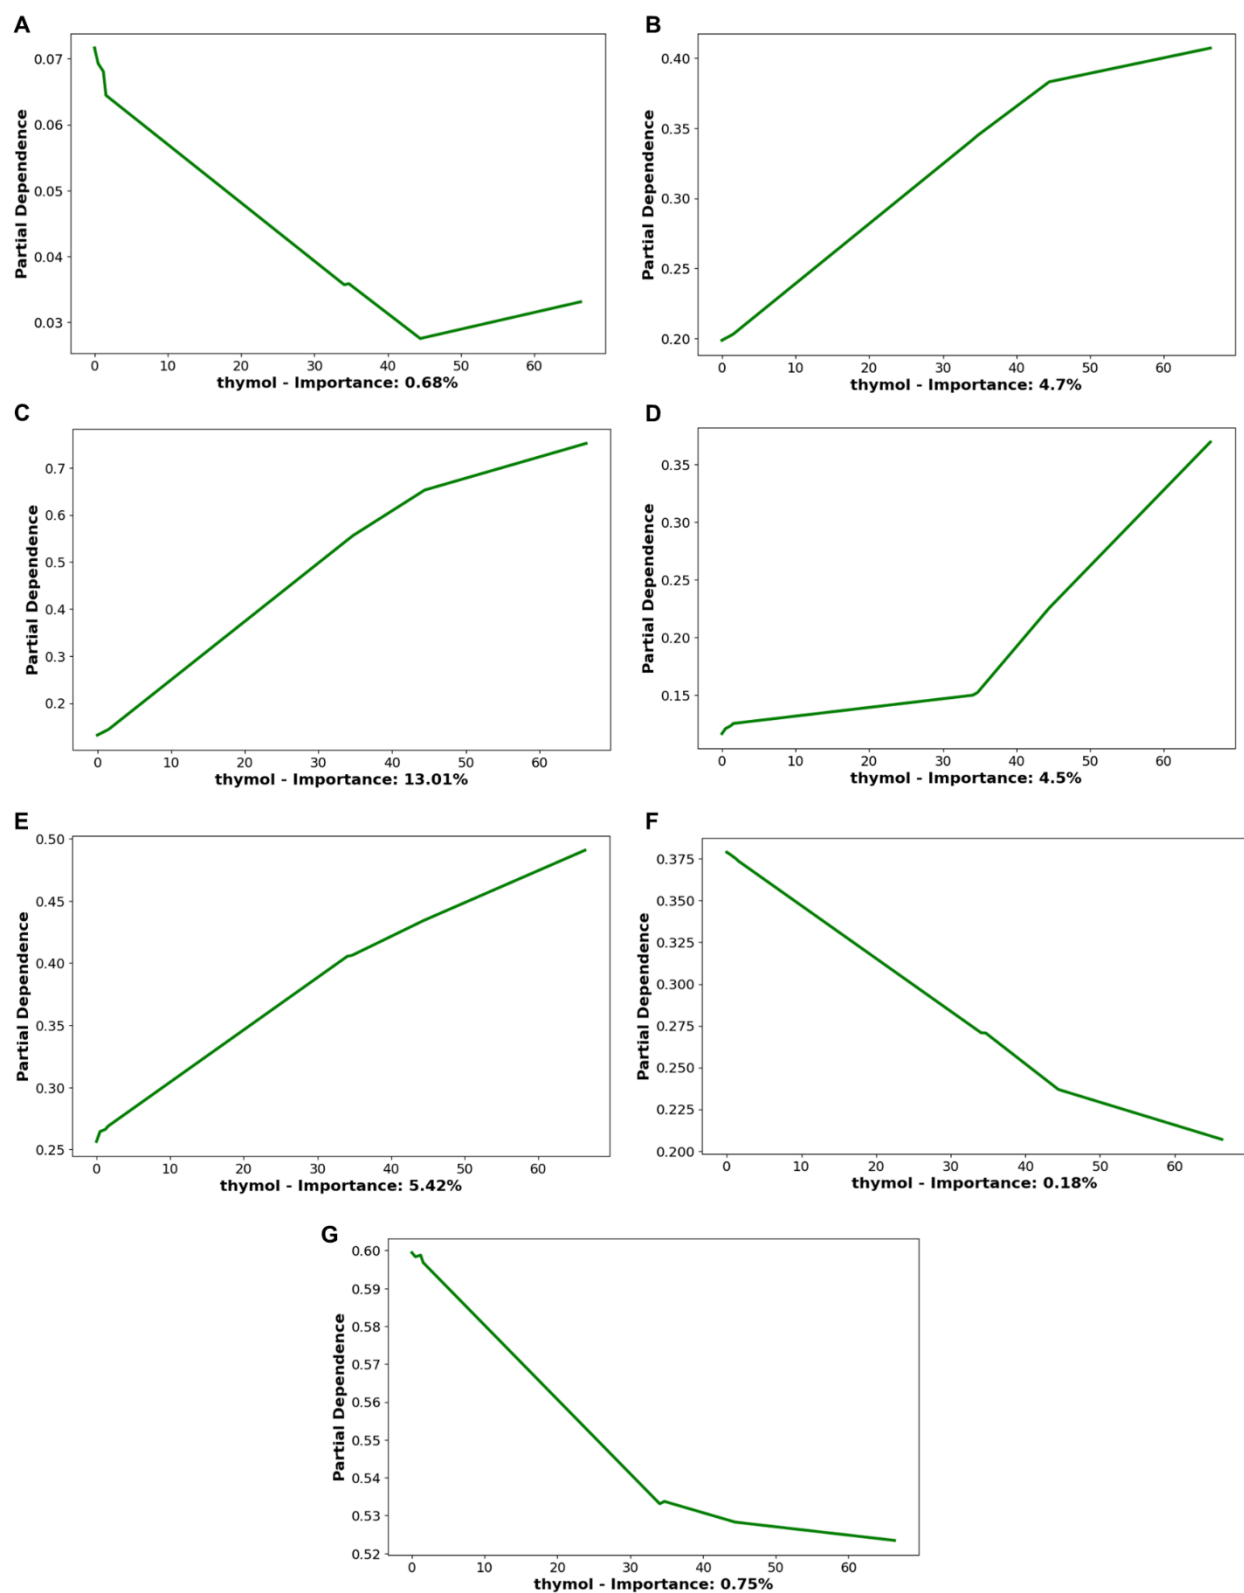

**Figure S61.** Partial dependence graphs of **thymol** in the model of  $M^{n+}$  (A),  $DPPH^\bullet$  (B),  $LOO^\bullet$  (C),  $ABTS^{\bullet+}$  (D),  $OH^\bullet$  (E),  $ROO\text{-}RBD_{50}$  (F),  $HO\text{-}RBD_{50}$  (G).

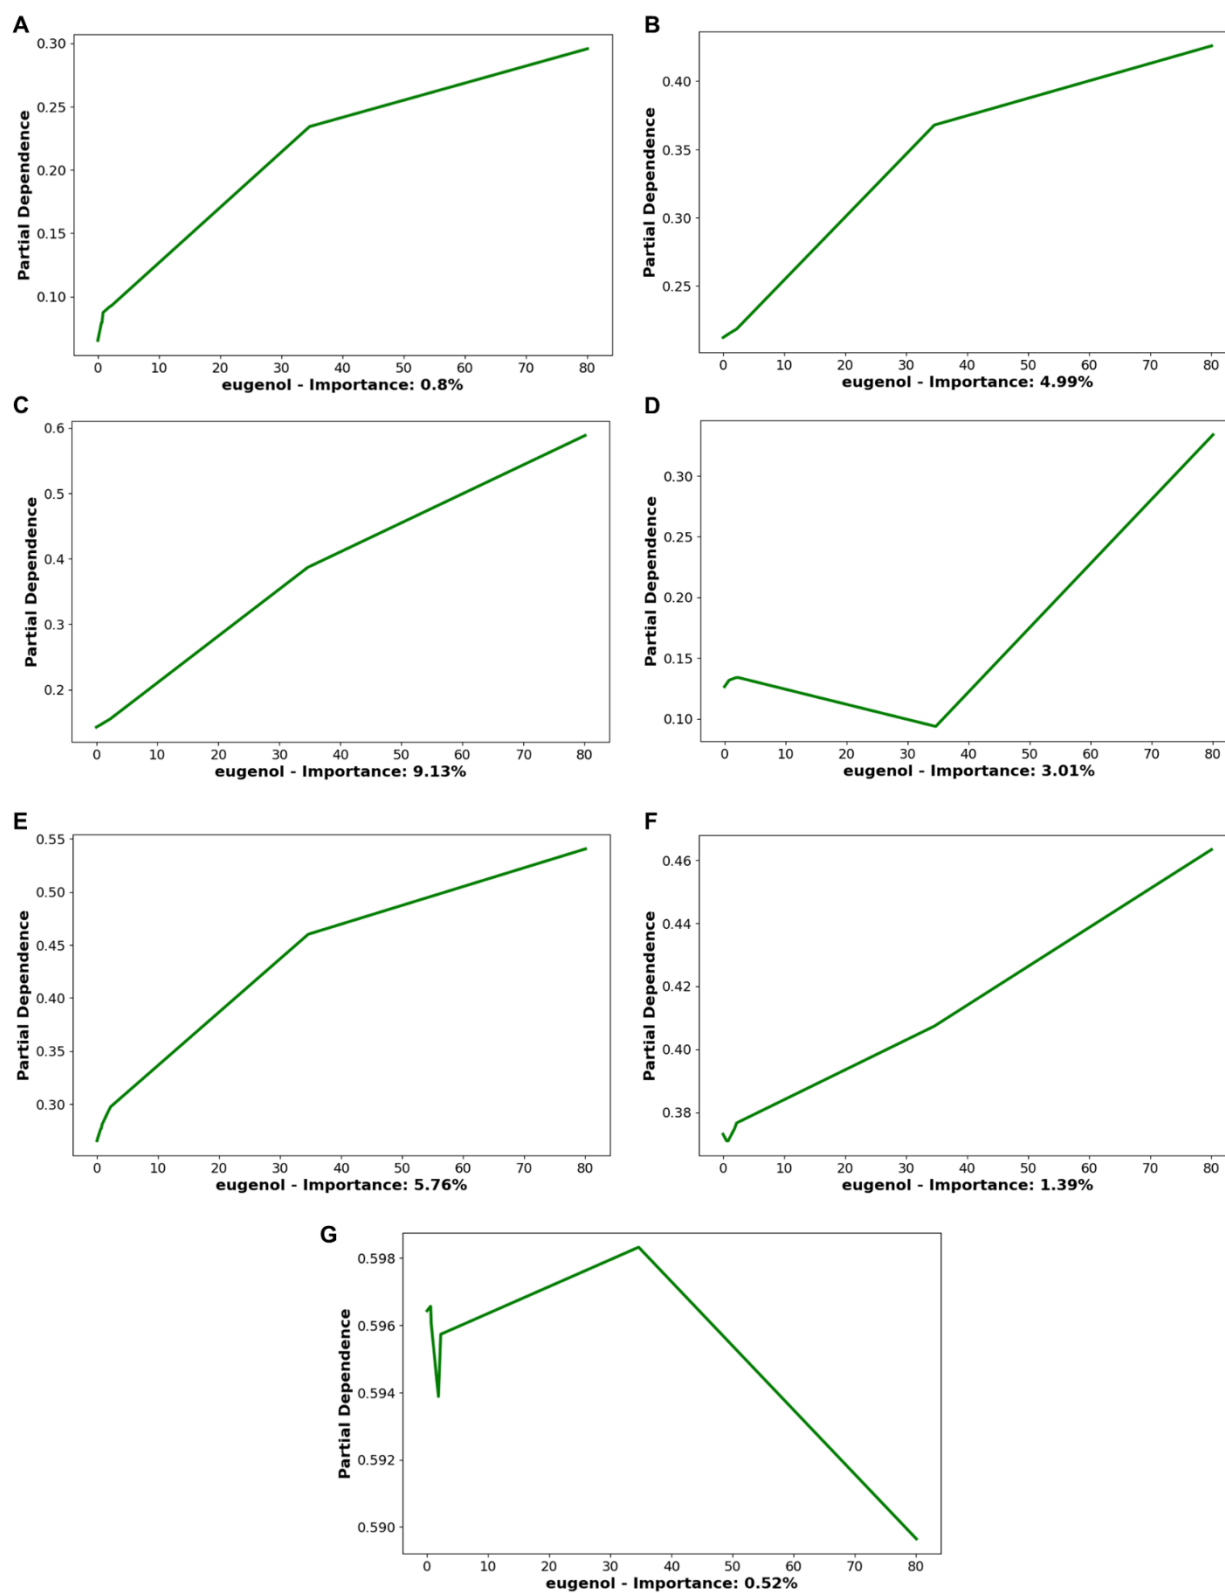

**Figure S62.** Partial dependence graphs of **eugenol** in the model of  $M^{n+}$  (A),  $DPPH^{\bullet}$  (B),  $LOO^{\bullet}$  (C),  $ABTS^{\bullet+}$  (D),  $OH^{\bullet}$  (E),  $ROO-RBD_{50}$  (F),  $HO-RBD_{50}$  (G).

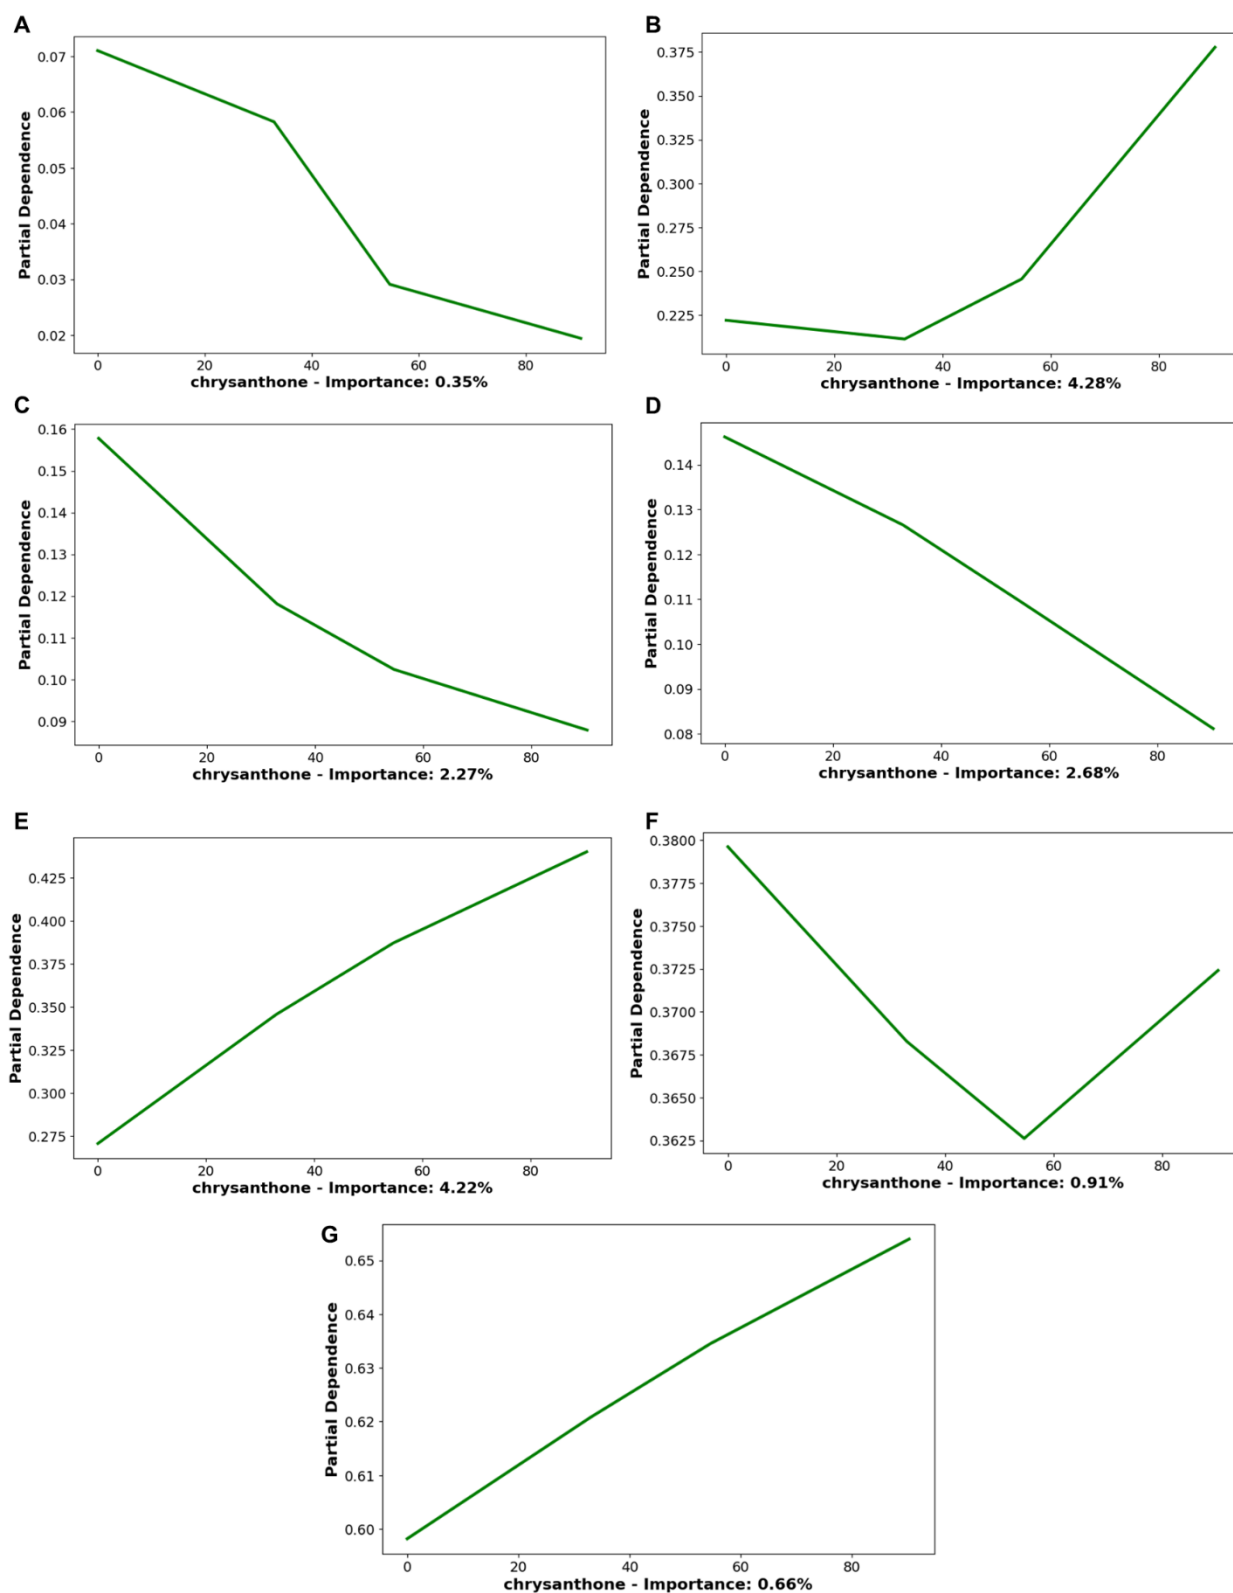

**Figure S63.** Partial dependence graphs of **chrysanthone** in the model of  $M^{n+}$  (A),  $DPPH^\bullet$  (B),  $LOO^\bullet$  (C),  $ABTS^{\bullet+}$  (D),  $OH^\bullet$  (E),  $ROO-RBD_{50}$  (F),  $HO-RBD_{50}$  (G).

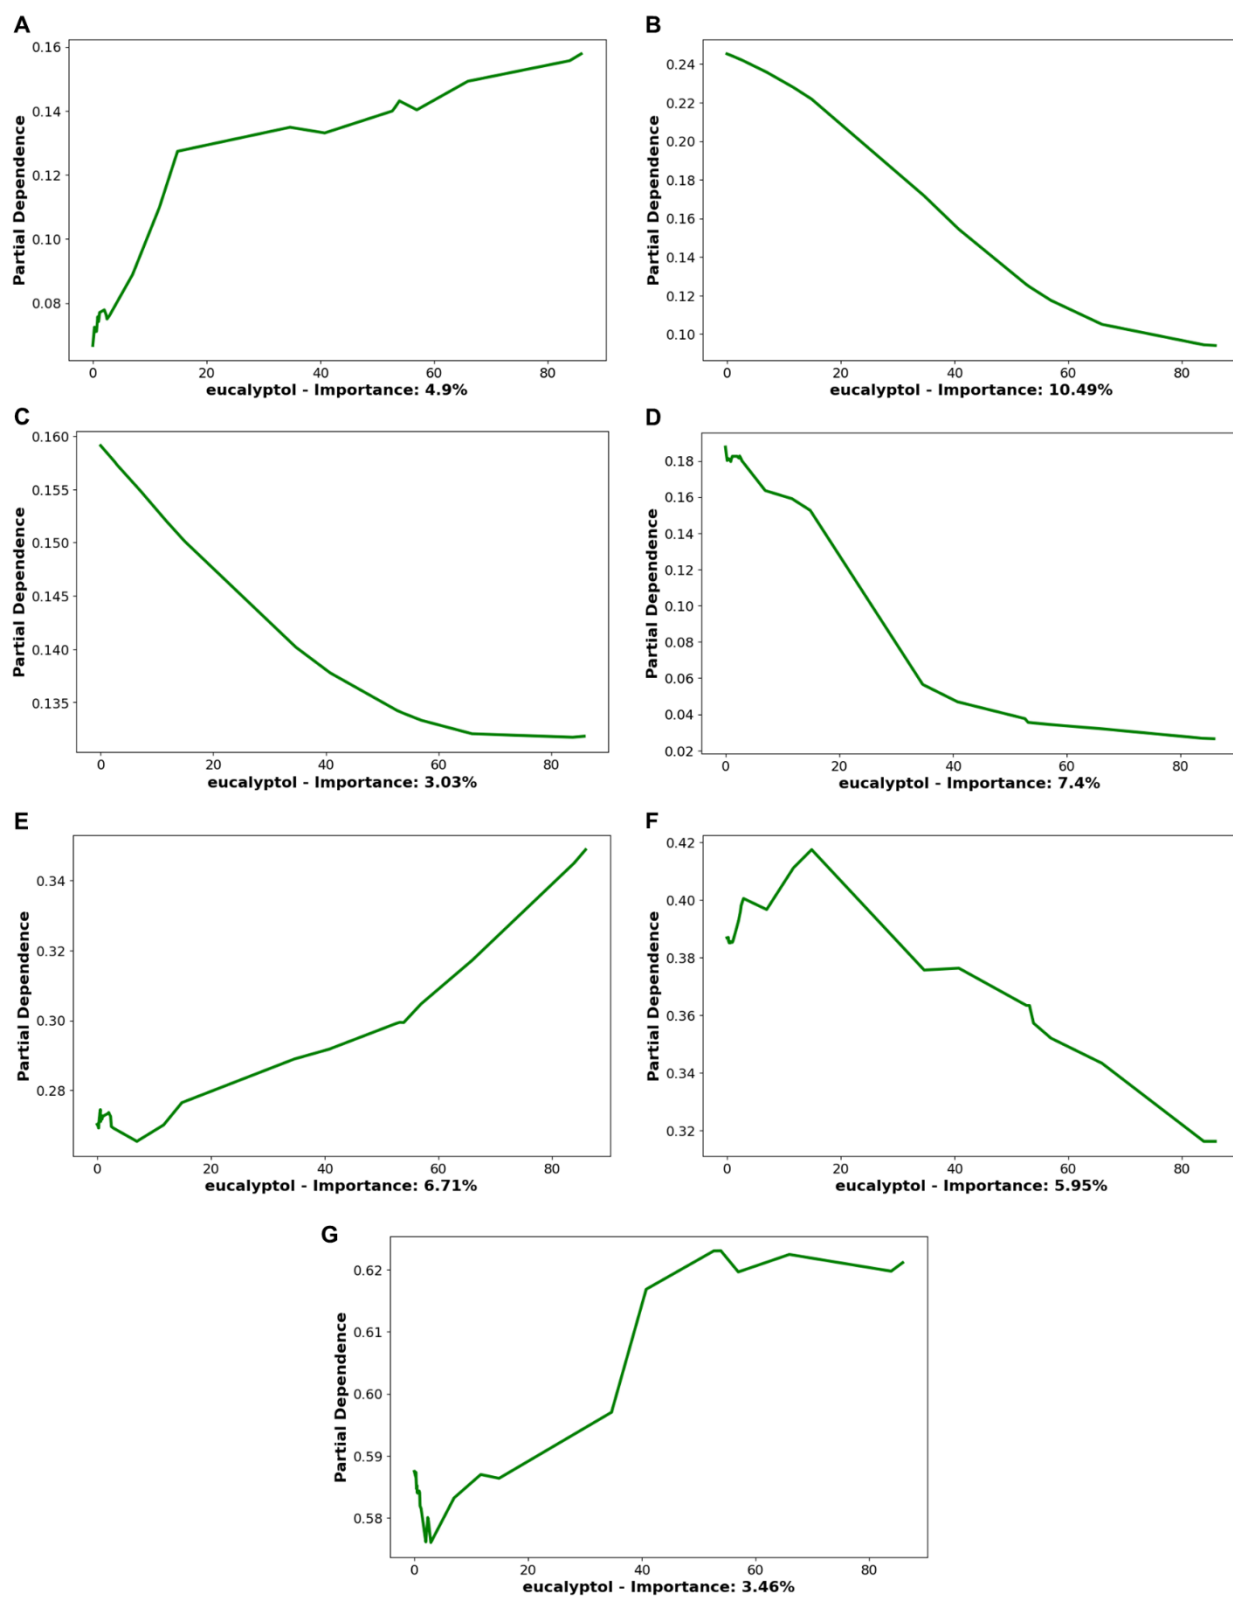

**Figure S64.** Partial dependence graphs of **chrysanthone** in the model of  $M^{n+}$  (A),  $DPPH^{\bullet}$  (B),  $LOO^{\bullet}$  (C),  $ABTS^{\bullet+}$  (D),  $OH^{\bullet}$  (E),  $ROO-RBD_{50}$  (F),  $HO-RBD_{50}$  (G).

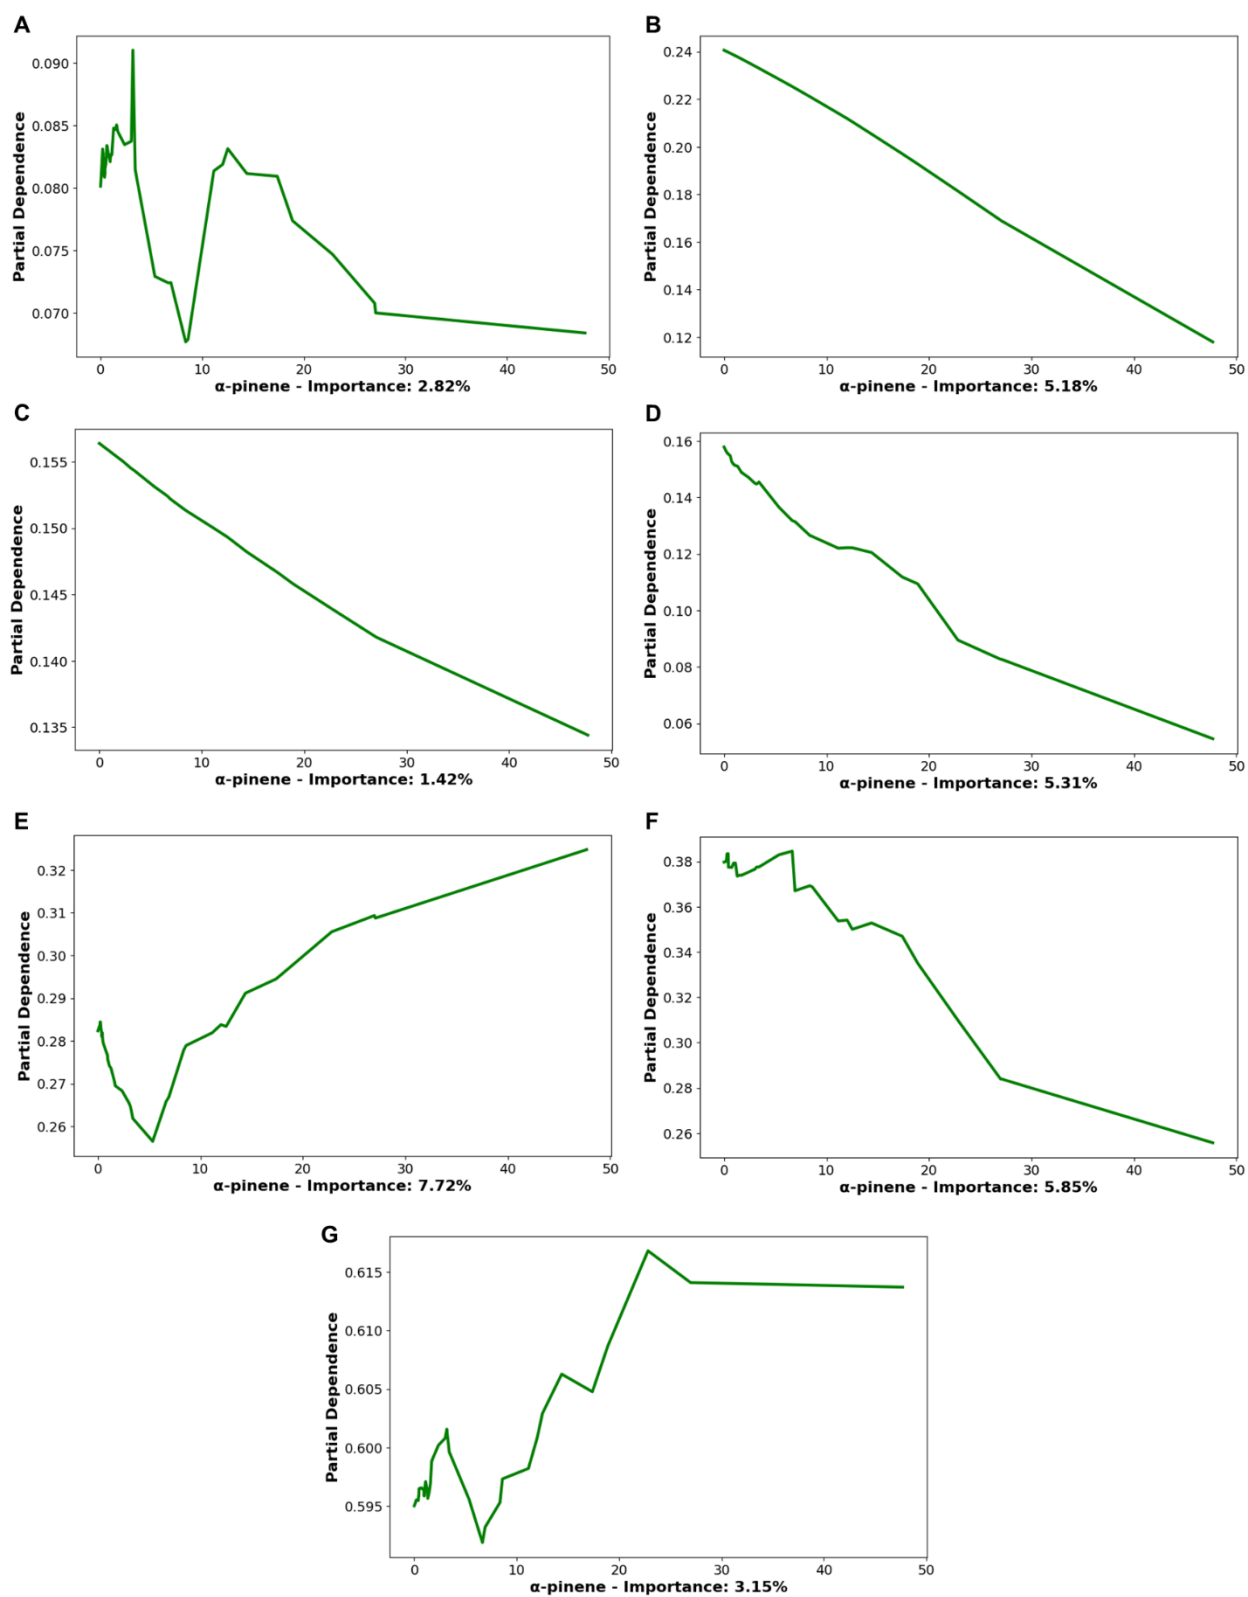

**Figure S65.** Partial dependence graphs of  $\alpha$ -pinene in the model of  $M^{n+}$  (A),  $DPPH^{\bullet}$  (B),  $LOO^{\bullet}$  (C),  $ABTS^{\bullet+}$  (D),  $OH^{\bullet}$  (E),  $ROO-RBD_{50}$  (F),  $HO-RBD_{50}$  (G).

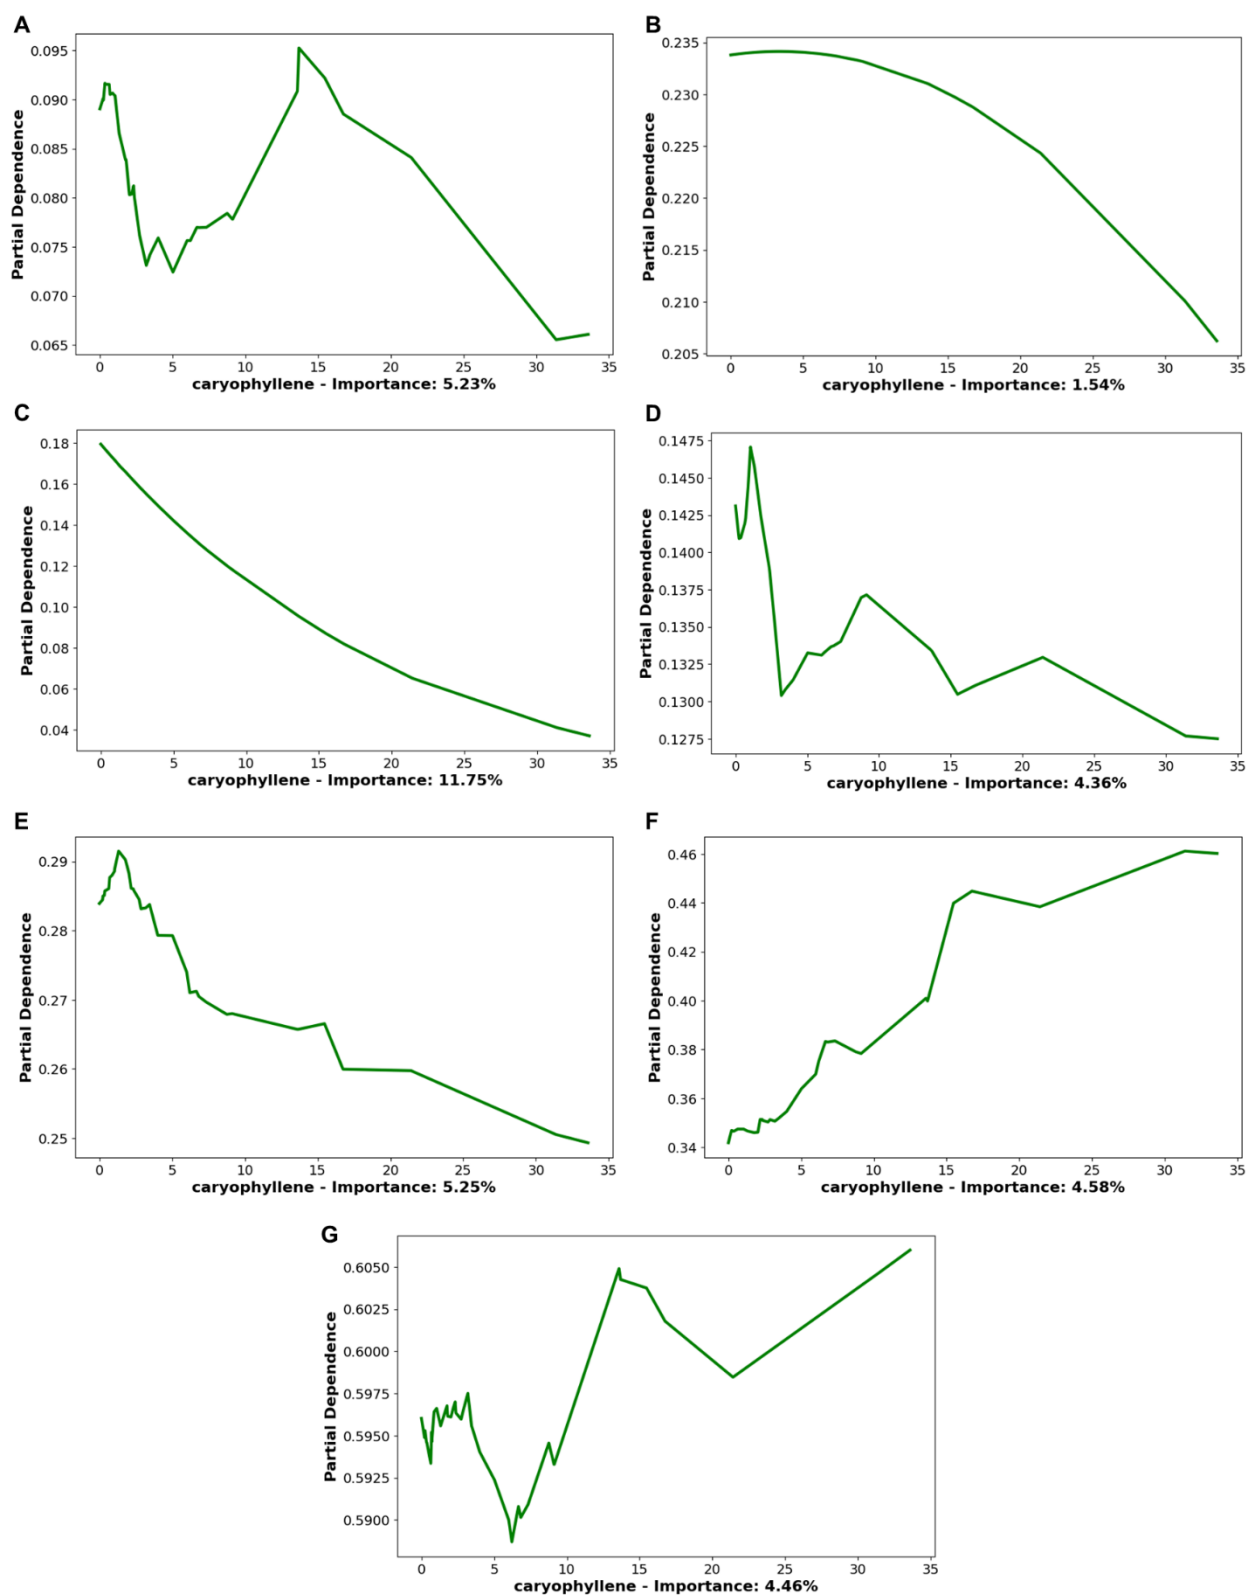

**Figure S66.** Partial dependence graphs of **caryophyllene** in the model of  $M^{n+}$  (A),  $DPPH^{\bullet}$  (B),  $LOO^{\bullet}$  (C),  $ABTS^{\bullet+}$  (D),  $OH^{\bullet}$  (E),  $ROO-RBD_{50}$  (F),  $HO-RBD_{50}$  (G).

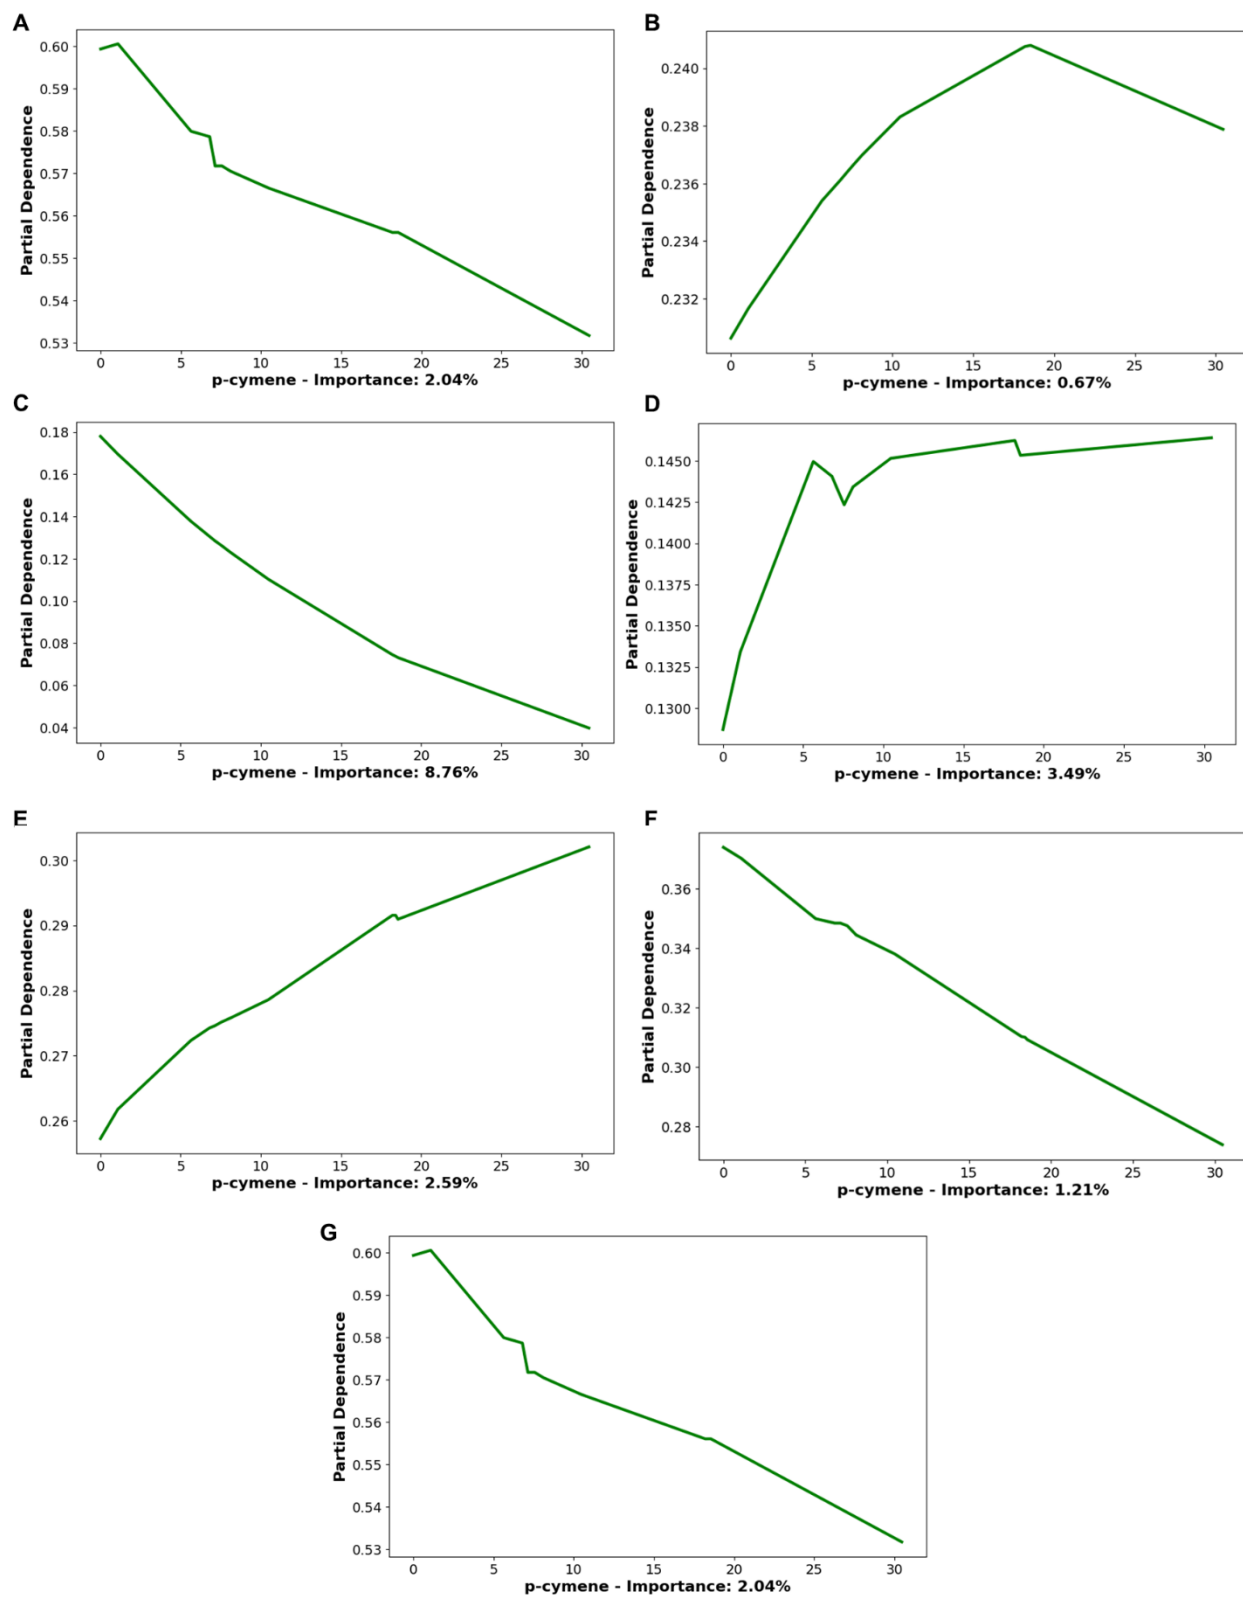

**Figure S67.** Partial dependence graphs of *p*-cymene in the model of  $M^{n+}$  (A),  $DPPH^{\bullet}$  (B),  $LOO^{\bullet}$  (C),  $ABTS^{\bullet+}$  (D),  $OH^{\bullet}$  (E),  $ROO-RBD_{50}$  (F),  $HO-RBD_{50}$  (G).

## Results

### ABTS cation radical neutralizing activity of EOs

According to the overall EC<sub>50</sub> concentration range against ABTS<sup>•+</sup>, one may presume that EOs were generally more potent against ABTS<sup>•+</sup> related to DPPH<sup>•</sup> and LOO<sup>•</sup>. Indeed, even fourteen EOs, namely Red thyme, Oregano, *Coridothymus capitatus*, Savory, Cedar leaves, *Origanum hirtum*, Rosemary, White thyme, *Mentha suaveolens*, *Thymus vulgaris*, *Origanum hirtum*, Lemongrass, Clove, and Birch EOs showed 76.67- (Red thyme) to 0.18-fold (Birch) better affinity for ABTS<sup>•+</sup> (and subsequently for OH<sup>•</sup>), whereas only four of them, *viz.* Ylang-ylang, Cade, CCP, and Laurel EOs were more potent against DPPH<sup>•</sup> (and thus for LOO<sup>•</sup>). Moreover, upon assigning the Laurel EO and *Mentha suaveolens* EO missing EC<sub>50</sub>s equal to 1 µg/mL, a correlation  $[EC_{50}] \text{ ABTS}^{•+} = 0.9284 \times [EC_{50}] \text{ DPPH}^{•} - 0.0236$  ( $r^2 = 0.8467$ ) was obtained, even though the neutralizations of DPPH<sup>•</sup> and ABTS<sup>•+</sup> are mechanistically different.

On the other hand, a brief analysis of EOs ABTS<sup>•+</sup>/LOO<sup>•</sup> relations revealed that an even number of EOs had a higher affinity for ABTS<sup>•+</sup> than for LOO<sup>•</sup>, and *vice versa*. Hence, nine EOs, namely Birch, *Mentha suaveolens*, Oregano, Clove, Cedar Leaves, *Origanum hirtum*, White thyme, Red thyme, and *Coridothymus capitatus* EOs showed 5.71- (Birch EO) to 0.39-fold (*Coridothymus capitatus* EO) better affinity for ABTS<sup>•+</sup>, whereas nine EOs, namely Cade, Ceylon cinnamon peel, Lemongrass, *Thymus vulgaris*, Nutmeg natural, Ylang-ylang, Laurel, Savory, and Rosemary EOs were 2.77- (Cade EO) to 0.26-fold (Rosemary EO) more potent against LOO<sup>•</sup>, yet with poorer correlation:  $[EC_{50}] \text{ LOO}^{•} = 0.7667 \times [EC_{50}] \text{ ABTS}^{•+} + 0.0632$  ( $r^2 = 0.74$ ).

### Antigenotoxic activity *in vitro*

EOs with increasing dose-dependent potency to protect DNA from ROO<sup>•</sup> and OH<sup>•</sup>

As for ROO<sup>•</sup>, in the concentration of 25 µg/mL, the listed EOs displayed the ROO-RBDs in the range of 0.805 (Eucalyptus EO) to 0.959 (Lavander EO) units, with an average ROO-RBD of 0.860, thus generally exerting lower average protective ability than Q (the average ROO-RBD equal to 0.880). At the same concentration, EOs protected DNA from damage induced by OH<sup>•</sup> with OH-RBDs in the range of 0.600 (Bergamot EO) to 0.959 (Camphor EO) units, and an average HO-RBD of 0.819, thus being slightly less potent than Q (an average OH-RBD of 0.823). Adding a 2-fold higher concentration of EOs endowed with the ROO-RBDs range of 0.812 (Savory EO) to 0.985 (Tea Tree EO) units, with the average ROO-RBD of 0.880, thus matching the protectivity of Q. As for OH<sup>•</sup>, a rise of DNA protection was evident 0.973 (*Coridothymus capitatus* EO). Furthermore, by matching the standard's concentration, EOs behaved just slightly more protectively than Q when considering ROO<sup>•</sup>, with an average ROO-RBD of 0.890 found in the range of 0.828 (Eucalyptus EO) to 0.988 (Lavander EO) units. On the other hand, they were notably more protective against the damage caused by OH<sup>•</sup>, with the HO-RBDs range of 0.735 (Siberian pine EO) to 0.891 (*Coridothymus capitatus* EO) units, and an average HO-RBD of 0.878. Somehow expected, with double-folding the standard's concentration, and with a ROO-RBD range of 0.847 (Eucalyptus EO) to 0.997 (Lavander EO), EOs achieved a very good level of protection against ROO<sup>•</sup>, better than Q, with an average ROO-RBD of 0.910. The level of protection was even more emphasized for OH<sup>•</sup>, being neutralized in the HO-RBD range from 0.809 (Palmarosa EO) to 0.974 (Cade EO) and with an average HO-RBD of 0.906 units. As already stated, the maximum protection of the DNA against ROO<sup>•</sup> was achieved with the EOs concentration of 400 µg/mL, by exerting the ROO-RBDs from 0.860 (Savory EO) to 0.996 (Myrtle EO) units, with the average RBD of 0.996. The same conclusion is valued for the OH<sup>•</sup>, for which the HO-RBD range was from 0.838 (Siberian pine EO) to 0.999 (*Eucalyptus globulus* EO) and the average HO-RBD was 0.937 units.

By analyzing only ROO-RBDs, no clear picture of EOs potency was gained. However, according to the ROO-RBD<sub>50</sub> values, the most potent protector of DNA was the Ginger EO sample (ROO-RBD<sub>50</sub> equal to 8.24 µg/mL), whereas the least potent one was Marjoram EO (ROO-RBD<sub>50</sub> equal to 324.83 µg/mL). Both EOs also notably neutralized the OH<sup>•</sup> radical with the OH-RBD<sub>50</sub>s of 56.34 and 60.02 µg/mL, respectively, but were discarded from further considerations due to no potency against single previously investigated species. On the other hand, the most prominent scavenger of OH<sup>•</sup> was *Coridothymus capitatus*, with the HO-RBD<sub>50</sub> equal to 24.26 µg/mL, thus correlating with the matching potency against 2'-deoxy-D-ribose (EC<sub>50</sub> = 0.22 µg/mL), but it was surprisingly not so potent against ROO<sup>•</sup>, as judged by the ROO-RBD<sub>50</sub> equal to 215.90 µg/mL, despite having high potency against LOO<sup>•</sup> (EC<sub>50</sub> of 0.232 µg/mL). The least active one was Lavander, characterized by the HO-RBD<sub>50</sub> of 209.76 µg/mL (at the same time exerting ROO-RBD<sub>50</sub> of 44.10 µg/mL). However, due to the failure against either Mn<sup>2+</sup> (*Coridothymus capitatus* and Lavander) or DPPH<sup>•</sup>, LOO<sup>•</sup>, ABTS<sup>•+</sup>, and OH<sup>•</sup> (Lavander), distinct EOs were discarded from future experiments.

EOs with decreasing dose-dependent potency to protect from ROO• and OH•

While counteracting the ROO•, in the lowest concentration, the listed EOs displayed the ROO-RBDs in the range of 0.843 (Grapefruit EO) to 0.945 (Red thyme EO) units, with the average ROO-RBD of 0.894, thus greatly surpassing the potency of Q. A more profound potency than Q was noticed against OH•, for which the EOs exerted HO-RBDs in the range of 0.843 (Coriander EO) to 0.997 (Red thyme EO) units, with the average HO-RBD of 0.924. Present in 2-fold lower quantity than Q, the EOs potencies against ROO• were found in the ROO-RBDs range of 0.836 (Grapefruit EO) to 0.923 (Red thyme EO) units, and with the descending average ROO-RBD of 0.889, still more potent than Q. As for OH•, EOs' HO-RBDs were in the range of 0.828 (Coriander EO) to 0.961 (Clary sage EO) units, with the average HO-RBD of 0.895. A trend of DNA protection decrease by listed EOs against either of radicals, toward below the potency of Q, continued with reaching the concentration of Q: the ROO-RBDs range has been 0.819 (Grapefruit EO) to 0.916 (Red thyme EO) units, while the average ROO-RBD was 0.874 the HO-RBDs range has been 0.805 (Coriander EO) to 0.938 (Clary sage EO) units, while the average HO-RBD was also 0.874. Surpassing 2-fold the concentration of Q, listed EOs even more severely lost their protective features against either ROO• or OH•, by means of an average ROO-RBD of 0.847 found in the ROO-RBDs range of 0.775 (Grapefruit EO) to 0.902 (Red thyme EO), as well as by virtue of an average HO-RBD of 0.816 found in the HO-RBDs range of 0.743 (Coriander EO) to 0.850 (Black pepper EO). Finally, in the highest of concentrations, the minimum of DNA protection was achieved, for either ROO• or OH•, by exerting the ROO-RBDs from 0.765 (Grapefruit EO) to 0.859 (Chamomile Morocco EO) units, and the average ROO-RBD of 0.821, as well as by displaying HO-RBDs from 0.713 (Coriander EO) to 0.813 (Roman chamomile EO) units, and the average HO-RBD of 0.784.

Within, the most potent preventer of ROO•-induced DNA damage was Grapefruit EO with the ROO-RBD<sub>50</sub> equal to 126.74 µg/mL, yet displaying better selectivity for OH•, as judged by the OH-RBD<sub>50</sub> of 103.10 µg/mL. Still, distinct EO has been previously only shown as a good chelator of M<sup>n+</sup> and was thus not considered a candidate for further elaboration. Within a sub-group, the least active ROO• scavenger was Clary sage EO, with the ROO-RBD<sub>50</sub> of 176.43 µg/mL, again more selective toward OH•, evident by the OH-RBD<sub>50</sub> equal to 168.31 µg/mL. However, Clary sage EO showed virtually no affinity for DPPH•, LOO•, ABTS••, M<sup>n+</sup>, and OH•. Considering OH•, the most potent sample was Roman chamomile EO, with the OH-RBD<sub>50</sub> = 65.90 µg/mL but with the undetermined ROO-RBD<sub>50</sub> and only moderately active against M<sup>n+</sup>. The least active OH• salmon DNA-level scavenger was the aforementioned Clary sage EO.

EOs with increasing and decreasing dose-dependent potency to protect DNA from ROO• and OH•, respectively

EOs labeled as Sage Oil, Garlic, Cade, Cedar leaves, Pine silvestre natural, Juniper, Birch, Orange sweet, Cajeput, Nutmeg natural, Verbena, Basil, Laurel, *Thymus vulgaris*, and *Origanum hirtum*, protected with more power the DNA from the damage induced by ROO• but were losing gradually the effectiveness against OH• with the increase of concentration applied.

Thus, while restraining the ROO•, the lowest-concentrated samples fitted in the range of ROO-RBDs from 0.788 (Juniper EO) to 0.962 (Birch EO) units, with the average ROO-RBD of 0.877, acting with lower potency than Q. The range of OH-RBDs was from 0.842 (Juniper EO) to 0.986 (White thyme EO) units, with an average OH-RBD of 0.910, for which the EOs were averagely more potent than Q. The affinity toward ROO• increased doubling the concentration of EOs, with ROO-RBD being on average 0.888 units. While matching Q in terms of concentration, listed EOs continued suppressing the ROO• (ROO-RBDs from 0.809 [Juniper EO] to 0.973 [Laurel EO] units, with the average ROO-RBD of 0.903), on one side, but were further losing the ability to fight the OH• (OH-RBDs from 0.803 [Birch EO] to 0.944 [Cajeput EO] units, with an average OH-RBD of 0.866), on the other. The disparity between the ROO•/OH• affinities enlarged with further concentration increment, having EOs highly potent against the ROO• (ROO-RBDs from 0.821 [Juniper EO] to 0.960 [Orange sweet EO] units, with the average ROO-RBD of 0.924) and weakly potent against the OH• (OH-RBDs from 0.731 [Verbena EO] to 0.944 [Cajeput EO] units, with an average OH-RBD of 0.827). In that sense, the maximal difference in the potency in favor of ROO• came with the maximal concentration of 400 µg/mL, where the 0.953/0.784 ratio was achieved between the average ROO-RBD and OH-RBD values (the ROO-RBDs ranged from 0.872 [Pine silvestre natural EO] to 0.984 [Laurel EO] the OH-RBDs ranged from 0.668 [Juniper EO] to 0.908 [Orange sweet EO]).

Among the subgroup, the Cedar leaves EO neutralized both ROO• and OH• (ROO-RBD<sub>50</sub> = 96.44 µg/mL OH-RBD<sub>50</sub> = 150.16 µg/mL), not surprising owing to the potency against the LOO• (EC<sub>50</sub> = 0.600 µg/mL) and OH• while protecting 2'-deoxy-D-ribose (EC<sub>50</sub> = 0.270 µg/mL). Still, Cedar leaves EO has been able to neutralize DPPH• and ABTS•• but not to chelate M<sup>n+</sup> as well, and was thus discarded from further consideration. The least potent scavenger of ROO• was *Thymus vulgaris* EO (ROO-RBD<sub>50</sub> = 232.47 µg/mL), likewise demonstrating a low affinity for OH• (OH-RBD<sub>50</sub> = 200.03 µg/mL), but with no inability to chelate M<sup>n+</sup>. Regarding the neutralization of OH•, Laurel EO showed some potential with the OH-RBD<sub>50</sub> equal to 78.70 µg/mL, but had no satisfactory dose-dependent profile for calculating the ROO-RBD<sub>50</sub>. A similar scenario was found

for Pine silvestre natural EO as the least active OH• scavenger (OH-RBD<sub>50</sub> = 213.01 µg/mL). The remaining EOs within this subgroup besides some perspective as judged by ROO-RBD<sub>50</sub> and OH-RBD<sub>50</sub> values, had no potency against M<sup>n+</sup>, DPPH•, LOO•, ABTS•<sup>+</sup>, and OH•.

EOs with decreasing and increasing dose-dependent potency to protect DNA from ROO• and OH•, respectively.

The remaining 6 EOs, namely Ylang-ylang, Cardamom, Mandarin, Cedar Fruit, Lemon, and Niaouly, with the increase of concentration, exerted decreased abilities to protect the DNA from the damage induced by ROO• but showed increasing effectiveness against OH•.

Thus, in the lowest concentration, the listed EOs counteracted the ROO• by means of the ROO-RBDs in the range of 0.840 (YY EO) to 0.971 (Cedar fruit EO) units, and an average ROO-RBD of 0.899, acting more potent than Q. While considering the protection against OH•, it occurred in between the 0.740 (Cedar fruit EO) and 0.878 (Ylang-ylang EO) µg/mL, characterized by an average of OH-RBD equal to 0.794 µg/mL. A second trial was endowed in the ROO-RBDs range of 0.831 (YY EO) to 0.964 (Lavander EO) units, yielding a descending average ROO-RBD of 0.888, during which EOs were still more potent than Q. Oppositely, the range of OH-RBDs was 0.721 (YY EO) to 0.895 (Lavander EO), with increasing average OH-RBD equal to 0.800 µg/mL. A similar trend continued during the third trial, as well, with the ROO-RBDs range of 0.811 (YY EO) to 0.896 (Niaouly EO) units, and the average ROO-RBD of 0.856, after which EOs lost their potency related to Q. As for OH-RBDs, they were in between the 0.732 (Niaouly EO) and 0.908 (YY EO), while the average value was 0.827, just slightly better than Q's. In the concentration of 200 µg/mL, listed EOs continued to lose the effectiveness against ROO•, as judged by an average ROO-RBD of 0.836 extracted from the range of 0.809 (YY EO) to 0.873 (Cedar fruit EO). In the same concentration, EOs on average overpowered Q with an average OH-RBD of 0.890, found between 0.843 (Mandarin EO) and 0.931 (YY EO) RBD units. As indicated, the lowest level of DNA protection from ROO• by discussed EOs was displayed in their highest concentration of 400 µg/mL, where ROO-RBDs ranged from 0.801 (Niaouly EO) to 0.913 (Cardamom EO) units, with an average of 0.839. On the other hand, the highest concentration applied resulted in the highest level of DNA protection from OH• by discussed EOs, where HO-RBDs ranged from 0.879 (Mandarin EO) to 0.968 (Lemon EO) units, with an average of 0.940.

Within the cluster of EOs, the highest potency to neutralize the ROO• was exerted by Cedar fruit EO, as judged by the ROO-RBD<sub>50</sub> equal to 54.50 µg/mL. The particular oil was also acceptably active against the OH• (OH-RBD<sub>50</sub> of 95.01 µg/mL), but was in the initial testing only potent to chelate the M<sup>n+</sup>. The worst protector of DNA against ROO• was Mandarin EO (ROO-RBD<sub>50</sub> = 197.55 µg/mL), still undetermined by means of potencies OH-RBD<sub>50</sub> and M<sup>n+</sup>, DPPH•, LOO•, ABTS•<sup>+</sup>, and OH•. Of the OH•-active ones at the level of DNA, again the best one was the Cedar fruit EO, whereas the weakest one was the Cardamom EO (OH-RBD<sub>50</sub> = 202.89 µg/mL), yet undetermined by means of ROO-RBD<sub>50</sub> and neutralization potencies of DPPH•, LOO•, ABTS•<sup>+</sup>, M<sup>n+</sup>, and OH•. The Lemon EO behaved similarly to Cardamom EO, dough with slightly higher potency toward OH• (OH-RBD<sub>50</sub> = 136.18 µg/mL) and with some potential to chelate M<sup>n+</sup>. The most interesting oil within the sub-group was YY EO, having ROO-RBD<sub>50</sub> of 64.14 µg/mL and OH-RBD<sub>50</sub> equal to 64.14 µg/mL (Figure 2), thus being among all the previously discussed sub-groups/extracts, the second one alongside the CCP EO with exceptional affinity to likewise neutralize DPPH•, LOO•, ABTS•<sup>+</sup>, M<sup>n+</sup>, and OH•. Therefore, YY EO was thus last selected for the *in vivo* administration.

#### Liver redox status

##### The *r*TBARS concentrations

In the lowest of concentration the protective response was less intensive (Table 4: III *vs.* I and V *vs.* I, 74.19 and 81.05% of the *r*TBARS concentration measured in the negative control, III *vs.* II and VI *vs.* II, 41.82 and 45.68% of the *r*TBARS concentration caused by CCl<sub>4</sub>). The more intensive protection was in the concentration of 200 mg/kg bwt (Table 4: IV *vs.* I and VII *vs.* I, 33.87 and 37.90% of the *r*TBARS concentration measured in the negative control, IV *vs.* II and VII *vs.* II, 19.00 and 21.36% of the *r*TBARS concentration caused by CCl<sub>4</sub>),

##### The *r*SOD catalytic activities

With such a low quantity of redox stress inducer, both EOs again replied very well even at a minimal dosage (Table 4: III *vs.* I, and VI *vs.* I, 93.93 and 91.65% of the catalytic activity of *r*SOD, respectively III *vs.* II, and VI *vs.* II, 1.79- and 1.75-fold higher catalytic activity of *r*SOD, respectively) and were very efficient in the medium (Table 4: IV *vs.* I and VII *vs.* I, 96.20 and 96.96% of the *r*SOD concentration, IV *vs.* II and VII *vs.* II, 1.84- and 1.85-fold higher *r*SOD).

### The *r*CAT catalytic activities

The lowest-concentrated formulations of either YY EO or CCP EO did not fully manage to compensate for the harmful effect of CCl<sub>4</sub> but were still able to increase the catalytic activity of *r*CAT, thus giving the signs of liver recovery (Table 4: III *vs.* I and VI *vs.* I, 65.30 and 60.48% of the *r*CAT basal catalytic activity III *vs.* II and VI *vs.* II, 1.12 and 1.05-fold higher catalytic activity of *r*CAT than caused by CCl<sub>4</sub>). Seemingly insignificant, these results agreed with the prediction for YY EO and CCP EO obtained while neutralizing the ABTS<sup>••</sup> (Table 1) that even the lowest concentrations of distinct EOs could be beneficial for CAT. The 200-folding YY EO and CCP EO dosages were more efficient (Table 4: IV *vs.* I and VI *vs.* I, 93.69 and 92.46% of the *r*CAT basal catalytic activity, IV *vs.* II and VI *vs.* II, 1.61 and 1.59-fold higher *r*CAT catalytic activity).

### The *r*GSH concentrations

The counteraction with either YY EO or CCP EO resulted in just mild hepatoprotection (Table 4: III *vs.* I and VI *vs.* I, 48.88 and 53.19% of the basal *r*GSH concentration III *vs.* II and VI *vs.* II, 1.08- and 1.17-fold higher *r*GSH concentration than caused by CCl<sub>4</sub>, respectively), but hepatoprotective features against CCl<sub>4</sub> became more expressed with the increase of concentrations (200 and 400 mg/kg, Table 4: IV *vs.* I and VII *vs.* I, 52.61 and 62.84% of the basal *r*GSH concentration IV *vs.* II and VII *vs.* II, 1.16- and 1.17-fold higher *r*GSH concentration than caused by CCl<sub>4</sub> V *vs.* I and VIII *vs.* I, 62.84 and 90.94% of the basal *r*GSH, V *vs.* II and VIII *vs.* II, 1.17- and 2.01-fold higher *r*GSH concentration than caused by CCl<sub>4</sub>).

### The hepatocytes toxicity status

#### The *r*AST and *r*ALT catalytic activities

It was interesting to observe that both *r*AST and *r*ALT were the sensitive indicators of YY EO and CCP EO as xenobiotics, given that the lowest of EOs concentrations provoked the strongest cellular responses (Table 5: III *vs.* I and VI *vs.* I, 7.64- and 2.61-fold over the basal *r*AST catalytic activity III *vs.* II and VI *vs.* II, 64.14 and 34.23% of the catalytic activity of *r*AST caused by CCl<sub>4</sub> III *vs.* I and VI *vs.* I, 2.49- and 2.20-fold over the basal *r*ALT catalytic activity III *vs.* II and VI *vs.* II, 43.63 and 38.52% of the catalytic activity of *r*ALT caused by CCl<sub>4</sub>). The lowest-concentration YY EO administration caused a more severe cellular response than CCP EO. Hepatocytes, however, adapted to the remedies with the concentrations increase, evident by the gradual decrease of enzymes' catalytic activities (Table 5: IV *vs.* I, and VII *vs.* I, 3.09- and 2.52-fold over the basal *r*AST catalytic activity IV *vs.* II and VII *vs.* II, 40.50 and 33.02% of the catalytic activity of *r*AST caused by CCl<sub>4</sub> IV *vs.* I and VII *vs.* I, 1.14- and 1.42-fold over the basal *r*ALT catalytic activity IV *vs.* II and VII *vs.* II, 19.90 and 24.74% of the catalytic activity of *r*ALT caused by CCl<sub>4</sub>).

#### The *r*ALP and $\gamma$ -GT catalytic activities

Hence, considering the catalytic activities of *r*ALP, YY EO was more effective than CCP EO while lowering them in the lowest (Table 5: III *vs.* I and VI *vs.* I, 1.72- and 1.96-fold over the basal *r*ALP catalytic activity III *vs.* II and VI *vs.* II, 84.01 and 95.55% of the catalytic activity of *r*ALP caused by CCl<sub>4</sub>) and medium concentration (III *vs.* I and VI *vs.* I, 1.48- and 1.82-fold over the basal *r*ALP catalytic activity III *vs.* II and VI *vs.* II, 71.94 and 88.75% of the catalytic activity of *r*ALP caused by CCl<sub>4</sub>) than for CCP EO.

As for  $\gamma$ -GT, it was CCP EO that lowered the catalytic activity of the enzyme with more potency than YY EO in all concentrations (Table 5: III *vs.* I, and VI *vs.* I, 3.06- and 2.81-fold over the basal  $\gamma$ -GT catalytic activity III *vs.* II and VI *vs.* II, 61.91 and 57.01% of the catalytic activity of  $\gamma$ -GT caused by CCl<sub>4</sub> IV *vs.* I, and VII *vs.* I, 1.93- and 1.83-fold over the basal  $\gamma$ -GT catalytic activity IV *vs.* II and VII *vs.* II, 39.00 and 37.00 % of the catalytic activity of  $\gamma$ -GT caused by CCl<sub>4</sub> V *vs.* I, and VIII *vs.* I, 1.32- and 1.21-fold over the basal  $\gamma$ -GT catalytic activity V *vs.* II and VIII *vs.* II, 26.78 and 24.55% of the catalytic activity of  $\gamma$ -GT caused by CCl<sub>4</sub>) for which some organ selectivity was confirmed.

### Kidneys redox status

#### The *r*TBARS concentrations

The lowest concentrations of YY EO and CCP EO were not so efficient in counteracting CCl<sub>4</sub> (Table 6: III *vs.* I, and VI *vs.* I, 8.95- and 6.44-fold higher than the basal *r*TBARS value III *vs.* II, and VI *vs.* II, 2.21- and 1.59 higher than the *r*TBARS value induced by CCl<sub>4</sub>, respectively), whereas in the medium concentration, CCP EO was more potent, even to the certain point restoring the kidneys membrane (Table 6: IV *vs.* I, and VII *vs.* I, 8.65- and 6.35-fold higher than the basal *r*TBARS value IV *vs.* II, and VII *vs.* II, 2.14-fold higher than the *r*TBARS value induced by CCl<sub>4</sub> and 99.00% of *r*TBARS concentration induced by CCl<sub>4</sub>, respectively).

### The *rSOD* catalytic activities

EOs were of notable efficiency while restoring the catalytic activity of *rSOD*, which has not been too high after the application of  $\text{CCl}_4$ , only 1.20-fold increased related to the basal value (Table 6: group II vs. group I), this time indirectly pointing to the high-intensity lipid peroxidation of nephrons' cell membrane. Thus, the lowest and medium dosages of either YY EO or CCP EO were considerably efficient (Table 6: III vs. I, and VI vs. I, 83.37 and 80.63% of the catalytic activity of *rSOD*, respectively III vs. II, and VI vs. II, 1.37- and 1.32-fold higher catalytic activity of *rSOD* IV vs. I and VII vs. I, 86.89 and 84.54% of the *rSOD* concentration, IV vs. II and VII vs. II, 1.42- and 1.38-fold higher *rSOD*).

### The *rCAT* catalytic activities

An excess of  $\text{rH}_2\text{O}_2$  in kidneys, caused by  $\text{CCl}_4$  and confirmed by a significant decrease in the catalytic activity of *rCAT* (Table 6: II vs. I, 30.76% of the *rCAT* catalytic activity), seemed to be efficiently neutralized by either of EOs assessed. Even in the lowest of concentrations, the *rCAT*'s catalytic activity was restored in a great manner (Table 6: III vs. I and VI vs. I, 86.10 and 89.10% of the *rCAT* basal catalytic activity III vs. II and VI vs. II, 2.80 and 2.90-fold higher catalytic activity of *rCAT* than caused by  $\text{CCl}_4$ ). Starting from 200 mg/kg bwt, YY EO was slightly more potent than CCP EO (Table 6: IV vs. I and VI vs. I, 97.36 and 96.12% of the *rCAT* basal catalytic activity, IV vs. II and VI vs. II, 3.16 and 3.12-fold higher *rCAT* catalytic activity).

### The *rGSH* concentration

An evaluation of EOs impact on kidneys' *rGSH*, revealed that they have been capable of restoring the marker's concentration downregulated by  $\text{CCl}_4$  (Table 6: II vs. I, 49.70% of basal concentration. In the lowest of concentrations, both EOs restored in more than 50% (Table 6: III vs. I and VI vs. I, 62.25 and 53.56% of the basal *rGSH* concentration III vs. II and VI vs. II, 1.25- and 1.08-fold higher *rGSH* concentration than caused by  $\text{CCl}_4$ , respectively), more than 70% in the mid concentration (Table 6: IV vs. I and VII vs. I, 80.29 and 70.31% of the basal *rGSH* concentration IV vs. II and VII vs. II, 1.62- and 1.41-fold higher *rGSH* concentration than caused by  $\text{CCl}_4$ ) whereas the maximal dosage restored it almost entirely (Table 6: V vs. I and VIII vs. I, 93.94 and 99.09% of the basal V vs. II and VIII vs. II, 1.17- and 2.01-fold higher *rGSH* concentration than caused by  $\text{CCl}_4$ ).

### Chronic kidney disease markers

#### The *rXO* catalytic activities

Still, the *rXO*'s catalytic activity was well downregulated by either YY EO or Ceylon cinnamon peel EO, with lower intensities in the 1 and 200 mg/kg btw concentrations (Table 6: III vs. I, and VI vs. I, 2.07- and 1.82-fold higher than the basal catalytic activity of *rXO* III vs. II, and VI vs. II, 75.26 and 66.05% of the *rXO* catalytic activity induced by  $\text{CCl}_4$  IV vs. I, and VII vs. I, 1.69- and 1.61-fold higher than the basal catalytic activity of *rXO* IV vs. II, and VII vs. II, 61.13 and 58.31% of the *rXO* catalytic activity induced by  $\text{CCl}_4$  respectively), but with the high intensity in 400 mg/kg bwt concentrations (Table 6: V vs. I, and VIII vs. I, 1.18- and 1.40-fold higher than the basal catalytic activity of *rXO* V vs. II, and VIII vs. II, 42.71 and 50.61% of the *rXO* catalytic activity induced by  $\text{CCl}_4$ ).

#### The *rXO* catalytic activities

The lowest and mid concentrations of either YY EO or CCP EO managed to just alleviate the damage caused by  $\text{CCl}_4$  (Table 7: III vs. I and VI vs. I, 3.30- and 2.54-fold higher *rNOX* catalytic activity than the basal value III vs. II and VI vs. II, 89.88 and 69.26% *rNOX* catalytic activity caused by  $\text{CCl}_4$  IV vs. I and VII vs. I, 1.51- and 1.42-fold higher *rNOX* catalytic activity than the basal value IV vs. II and VII vs. II, 41.05 and 38.72% *rNOX* catalytic activity caused by  $\text{CCl}_4$ ), while homeostasis was nearly restored with the administration of the highest doses (Table 7: V vs. I and VIII vs. I, 1.30- and 1.19-fold higher *rNOX* catalytic activity than the basal value III vs. II and VI vs. II, 35.41 and 32.30% *rNOX* catalytic activity caused by  $\text{CCl}_4$ ).

#### The *rNO* concentrations

Still, both YY EO and CCP EOas supplements managed to restore the *rNO* concentration in great manner even in lowest and medium concentrations administered (Table 7: III vs. I and VI vs. I, 69.49 and 54.43% of the basal *rNO* concentration III vs. II and VI vs. II, 1.81- and 1.42-fold higher *rNO* concentration than caused by  $\text{CCl}_4$  IV vs. I and VII vs. I, 92.80 and 70.18% of the basal *rNO* concentration IV vs. II and VII vs. II, 2.48- and 1.83-fold higher *rNO* concentration than caused by  $\text{CCl}_4$ ).

## The GPx catalytic activities

As expected, both EOs managed to gradually restore *rGPx*'s catalytic activity with the rise of concentration (Table 7: III *vs.* I and VI *vs.* I, 60.00 and 72.00% of the basal *rGPx* catalytic activity III *vs.* II and VI *vs.* II, 1.25- and 1.50-fold higher *rGPx* catalytic activity than caused by CCl<sub>4</sub> IV *vs.* I and VII *vs.* I, 80.00 and 84.00% of the basal *rGPx* catalytic activity IV *vs.* II and VII *vs.* II, 1.67- and 1.75-fold higher *rGPx* catalytic activity than caused by CCl<sub>4</sub> V *vs.* I and VIII *vs.* I, 96.00 and 88.00% of the basal *rGPx*, V *vs.* II and VIII *vs.* II, 1.17- and 2.01-fold higher *rGPx* catalytic activity than caused by CCl<sub>4</sub>), where YY EO acted better.

## EOs antigenotoxic activity *in vivo*

### Antigenotoxicity in liver

The counter-treatment with 1 mg/kg bwt of Ylang-ylang EO significantly reduced the liver DNA damage caused by CCl<sub>4</sub>, as verified by 2.72-fold higher total comet score (TCS) value related to negative control (Table 8, III *vs.* I), 48.45% of the TCS found for CCl<sub>4</sub> (Table 8, III *vs.* II), and the percentage reduction level (%R) of 62.7%. At the same concentration, CCP EO was slightly more efficient (Table 8, VI *vs.* I, 2.51-fold higher TS III *vs.* II, 44.57% of the TCS found for CCl<sub>4</sub>, and the %R of 67.4%. The 200-fold higher concentration of YY EO reduced the level of CCl<sub>4</sub>-induced DNA damage as associated with the 2.17-fold higher TCS than found for the negative control (Table 8, IV *vs.* I), 38.62% of the TS of CCl<sub>4</sub> (Table 8, IV *vs.* II), and a %R of 74.7%, whereas the comparable concentration of CCP EO yielded the TCS 1.9-fold higher than in the negative control (Table 8, VII *vs.* I) and 33.76% of the value found for CCl<sub>4</sub>, still inducing better %R of 80.60%.

### Antigenotoxicity in kidneys

The potential protective activity of selected EOs against the CCl<sub>4</sub>-induced DNA damage was in the end assessed in the kidney cells of albino Wistar rats (Table 9) and again compared to either negative control group, in which most of the comets showed no DNA damage (type T<sub>0</sub>) and a few of them indicated very low damage (type T<sub>1</sub>) (Table 9, I), or CCl<sub>4</sub> alone, which significantly increased a TSC in kidney cells as compared with the CCl<sub>4</sub>-free group (Table 9, II *vs.* I), all because of large-damage comets (*viz.* types T<sub>3</sub> and T<sub>4</sub>) presence.

Canceling out the CCl<sub>4</sub>'s harmful effect on kidneys' DNA by means of YY EO application at the lowest dose was evident upon observing the significant reduction in the DNA damage as indicated in the TCS value 2.50-fold higher than in the hazardous agent-free group (Table 9, III *vs.* I), 39.37% of the TSC value of CCl<sub>4</sub> (Table 9, III *vs.* II), and a %R of 71.9%. The matching action of CCP EO endowed with the 2.01-fold higher TCS level than measured in olive oil sample (Table 9, VI *vs.* I), 31.65% of TSC compared to the single treatment of CCl<sub>4</sub> (Table 9, VI *vs.* II), and %R of 81.1%, again with better potency than YY EO in the lowest concentration. Further, highly emphasized antagonistic features of YY EO related to CCl<sub>4</sub> were noted after being co-administered at 200 mg/kg bwt, causing a 1.95-fold higher TCS than the basal value (Table 9, IV *vs.* I), decrease in the TCS from 138.7 (CCl<sub>4</sub> alone) to 42.5 (Table 9, IV *vs.* II) and a %R of 82.3%. The equivalent dosage of CCP EO produced the 1.54-fold TCS increment related to native value (Table 9, VII *vs.* I), a reduced the value of TCS by 4.13-fold than for CCl<sub>4</sub> (Table 9, II *vs.* VII), and a %R of 89.9%, retaining its supremacy compared to YY EO. Differently to liver, CCP EO was more potent than YY EO in the highest of concentration. Still, both EOs even more pronouncedly decrease protected the DNA, lowering the TCSs to the 1.69 and 1.31-fold higher values than basal ones (Table 9, V *vs.* I and VIII *vs.* I), to the 26.53 and 20.55% of TCSs observed for CCl<sub>4</sub> (Table 9, V *vs.* II and VIII *vs.* II), and causing the %Rs equal to 87.2 and 94.4%, respectively.

Canceling out the CCl<sub>4</sub>'s harmful effect on kidneys' DNA by means of YY EO application at the lowest dose was evident upon observing the significant reduction in the DNA damage as indicated in the TCS value 2.50-fold higher than in the hazardous agent-free group (Table 9, III *vs.* I), 39.37% of the TSC value of CCl<sub>4</sub> (Table 9, III *vs.* II), and a %R of 71.9%. The matching action of CCP EO endowed with the 2.01-fold higher TCS level than measured in olive oil sample (Table 9, VI *vs.* I), 31.65% of TSC compared to the single treatment of CCl<sub>4</sub> (Table 9, VI *vs.* II), and %R of 81.1%, again with better potency than YY EO in the lowest concentration. Further, highly emphasized antagonistic features of YY EO related to CCl<sub>4</sub> were noted after being co-administered at 200 mg/kg bwt, causing a 1.95-fold higher TCS than the basal value (Table 9, IV *vs.* I), decrease in the TCS from 138.7 (CCl<sub>4</sub> alone) to 42.5 (Table 9, IV *vs.* II) and a %R of 82.3%. The equivalent dosage of CCP EO produced the 1.54-fold TCS increment related to native value (Table 9, VII *vs.* I), a reduced the value of TCS by 4.13-fold than for CCl<sub>4</sub> (Table 7, II *vs.* VII), and a %R of 89.9%, retaining its supremacy compared to YY EO.
